# Supplementary material for: Longer-term needs of stroke survivors with communication difficulties living in the community: a systematic review and thematic synthesis of qualitative studies
Source: PubMed Central journal article supplement — BMJ Open. 2017 Oct 6;7(10):e017944. doi: 10.1136/bmjopen-2017-017944 (PMC5640038; doi:10.1136/bmjopen-2017-017944), 2017-10-06
Supplement: bmjopen-2017-017944.draft_revisions.pdf [file bmjopen-2017-017944.draft_revisions.pdf]

# BMJ Open

BMJ Open is committed to open peer review. As part of this commitment we make the peer review history of every article we publish publicly available.

When an article is published we post the peer reviewers' comments and the authors' responses online. We also post the versions of the paper that were used during peer review. These are the versions that the peer review comments apply to.

The versions of the paper that follow are the versions that were submitted during the peer review process. They are not the versions of record or the final published versions. They should not be cited or distributed as the published version of this manuscript.

BMJ Open is an open access journal and the full, final, typeset and author-corrected version of record of the manuscript is available on our site with no access controls, subscription charges or pay-per-view fees (<http://bmjopen.bmj.com>).

If you have any questions on BMJ Open's open peer review process please email [editorial.bmjopen@bmj.com](mailto:editorial.bmjopen@bmj.com)

# BMJ Open

## Longer-term needs of stroke survivors with communication difficulties living in the community: A systematic review and thematic synthesis of qualitative studies.

|                                 |                                                                                                                                                             |
|---------------------------------|-------------------------------------------------------------------------------------------------------------------------------------------------------------|
| Journal:                        | <i>BMJ Open</i>                                                                                                                                             |
| Manuscript ID                   | bmjopen-2017-017944                                                                                                                                         |
| Article Type:                   | Research                                                                                                                                                    |
| Date Submitted by the Author:   | 26-May-2017                                                                                                                                                 |
| Complete List of Authors:       | Wray, Faye; University of Leeds, Leeds Institute of Health Sciences<br>Clarke, David; University of Leeds, Academic Unit of Elderly Care and Rehabilitation |
| <b>Primary Subject Heading</b>: | Rehabilitation medicine                                                                                                                                     |
| Secondary Subject Heading:      | Qualitative research, Communication, Health services research                                                                                               |
| Keywords:                       | Systematic review, Stroke < NEUROLOGY, aphasia, dysarthria, apraxia of speech                                                                               |
|                                 |                                                                                                                                                             |

SCHOLARONE™  
Manuscripts

1  
2  
3 Longer-term needs of stroke survivors with communication difficulties  
4  
5  
6 living in the community: A systematic review and thematic synthesis of  
7  
8 qualitative studies.  
9  
10

11  
12  
13  
14 Faye Wray\*<sup>1</sup> and David Clarke<sup>1</sup>  
15  
16

17  
18  
19 Word count: 5556  
20  
21  
22  
23  
24  
25  
26  
27  
28  
29  
30

31 Keywords: Stroke, Aphasia, Dysarthria, Apraxia of Speech, Systematic Review  
32  
33  
34  
35  
36  
37  
38

---

39 **CONTACT DETAILS**

- 40  
41  
42 ○ Mrs Faye Wray (\*corresponding author)

43  
44 Email: [ps10fdp@leeds.ac.uk](mailto:ps10fdp@leeds.ac.uk) Tel: 01274 382818  
45

46 Address: Academic Unit of Elderly Care and Rehabilitation, Leeds Institute for Health Sciences,  
47 Bradford Institute for Health Research, Temple Bank House, Bradford Royal Infirmary, BD9 6RJ  
48  
49

- 50  
51  
52 ○ Dr David Clarke

53  
54 Email: [d.j.clarke@leeds.ac.uk](mailto:d.j.clarke@leeds.ac.uk) Tel: 01274 383441  
55

56 Address: Academic Unit of Elderly Care and Rehabilitation, Leeds Institute for Health Sciences,  
57 Bradford Institute for Health Research, Temple Bank House, Bradford Royal Infirmary, BD9 6RJ  
58  
59  
60

## ABSTRACT

**Objective:** To review and synthesise qualitative literature relating to the longer-term needs of community dwelling stroke survivors with communication difficulties including aphasia, dysarthria and apraxia of speech.

**Design:** Systematic review and thematic synthesis.

**Method:** We included studies employing qualitative methodology which focused upon the perceived or expressed needs, views or experiences of stroke survivors with communication difficulties in relation to the day to day management of their condition following hospital discharge. We searched MEDLINE, EMBASE, PsycINFO, CINAHL, The Cochrane Library and IBSS and undertook grey literature searches. Studies were assessed for methodological quality by two researchers independently and the findings were combined using thematic synthesis.

**Results:** Thirty-two studies were included in the thematic synthesis. The synthesis reveals the ongoing difficulties stroke survivors can experience in coming to terms with the loss of communication and in adapting to life with a communication difficulty. Whilst some were able to adjust, others struggled to maintain their social networks and to participate in activities which were meaningful to them. The challenges experienced by stroke survivors with communication difficulties persisted for many years post-stroke. Four themes relating to longer-term need were developed: Managing communication outside of the home, creating a meaningful role, creating or maintaining a support network and taking control and actively moving forward with life.

**Conclusions:** Understanding the experiences of stroke survivors with communication difficulties is vital for ensuring that longer-term care is designed according to their needs. Wider psychosocial factors must be considered in the rehabilitation of people with post-stroke communication difficulties. Self-management interventions may be appropriate to help this sub-group of stroke survivors manage their condition in the longer-term; however, such approaches must be designed to help survivors to manage the unique psychosocial consequences of post-stroke communication difficulties.

## ARTICLE SUMMARY

### Strengths and limitations of this study

- This is the first systematic review and synthesis of qualitative studies which have included stroke survivors with communication difficulties.
- By synthesising qualitative literature, a greater level of conceptual or theoretical understanding can be gained than by looking at one study in isolation.
- Thematic synthesis is a robust method of synthesis which draws together information from qualitative literature in order to make reasoned recommendations for future intervention development.
- Many of the studies identified did not describe the role of the researcher which may impact upon the data collected and the findings of the synthesis.
- The impact of publication bias in qualitative literature is difficult to assess.

## INTRODUCTION

The global burden of stroke is set to rise. It is predicted that by 2030, there will be 12 million stroke deaths, 70 million stroke survivors and 200 million disability adjusted life years lost due to stroke worldwide <sup>1</sup>. In England, it is estimated that 300 000 people are living with moderate to severe disability following stroke <sup>2</sup>. The disabilities stroke survivors face are complex and there is a high prevalence of unmet need in the years following acute onset <sup>3</sup>. Qualitative research has identified that the transition between hospital and community services is difficult and that many stroke survivors feel unsupported and abandoned in the longer-term <sup>4-6</sup>. Although the importance of supporting stroke survivors in the longer-term has been recognised by policymakers, the precise format and content of such support has yet to be established <sup>2 7 8</sup>. Developing an evidence-based care pathway which meets the complex needs of individuals and families coping with the aftermath of stroke remains a challenge <sup>9-11</sup>.

Up to one third of survivors will experience communication difficulties post-stroke including aphasia, dysarthria or apraxia of speech <sup>12-15</sup> resulting in difficulties with language comprehension, speech production and difficulties with reading and writing. Research suggests that this sub-group of stroke survivors may have particularly poor longer-term outcome <sup>16</sup>, for example, stroke survivors with aphasia living in the community have reduced quality of life compared to those without and participate in fewer activities of daily living <sup>17</sup>. This sub-group are also more likely to suffer from depression <sup>18</sup> and have reduced social interactions <sup>19</sup>. Although stroke survivors with communication difficulties may benefit from longer-term support, the needs of this population in relation to longer-term care have not been explored.

Qualitative research provides in-depth accounts of the views, meanings and experiences of patients and is increasingly seen as an important contributor to complex intervention development <sup>20-22</sup>. In the wider stroke literature systematic reviews and syntheses of qualitative literature have been undertaken <sup>23-25</sup>. However, Walsh et al. <sup>25</sup> and Satink et al. <sup>24</sup> noted the lack of studies involving stroke survivors

1  
2  
3 with communication difficulties and therefore it is unclear if the findings from such  
4 reviews can be generalised to this population. More recently researchers have  
5 developed strategies to ensure that, wherever possible, those with communication  
6 difficulties can be included in qualitative research<sup>26-28</sup>. There is a growing body of  
7 research in this field which highlights the stroke survivor's perspective on living with  
8 a communication difficulty<sup>29</sup>. However, to date there has been no systematic review  
9 and synthesis of these studies.  
10  
11  
12  
13  
14  
15  
16  
17

18 Systematic reviews of qualitative research draw together study findings, allowing a  
19 greater level of conceptual or theoretical understanding than can be gained by  
20 looking at one study in isolation<sup>30 31</sup>. Qualitative synthesis aims to go beyond a  
21 descriptive summary or aggregation of study findings and create an overall  
22 interpretation of the literature. This review uses thematic synthesis<sup>32</sup> which clearly  
23 distinguishes between synthesis at a descriptive and interpretive level. Two types of  
24 themes are developed: descriptive themes which are a summary of findings across  
25 included studies and analytical themes which translate or interpret study findings  
26 with regards to the research question. By creating an overall interpretation of the  
27 literature in relation to a particular research focus, the findings can inform future  
28 intervention development, clinical practice and policy<sup>30 31</sup>. In order to design a  
29 longer-term care strategy for stroke survivors with communication difficulties, it is  
30 important to synthesise qualitative research findings to better understand the  
31 requirements for longer-term care from the patients' perspective. The current review  
32 aimed to explore the needs of stroke survivors with communication difficulties in  
33 relation to longer-term care.  
34  
35  
36  
37  
38  
39  
40  
41  
42  
43  
44  
45  
46  
47  
48  
49  
50  
51  
52  
53  
54  
55  
56  
57  
58  
59  
60

## METHOD

A systematic review and thematic synthesis<sup>32</sup> of qualitative literature relating to the needs of stroke survivors with communication difficulties living in the community was undertaken. A review protocol was developed but was not registered or published.

### Eligibility criteria

*Study design:* Studies published in English, employing qualitative methodology and qualitative methods of data analysis.

*Population:* Adults (aged 16+) with communication difficulties following stroke (aphasia, dysarthria or apraxia of speech).

*Outcomes:* The perceived or expressed needs, views or experiences of stroke survivors with communication difficulties in relation to the day-to-day management of their condition following hospital discharge (including studies in which carers, friends or relatives shared their perspectives upon the needs, views or experiences of stroke survivors). Studies were excluded where the focus was upon the delivery or evaluation of a specific communication intervention.

### Search terms

Search terms were developed with an information specialist using an iterative process including scoping searches and repeated piloting. In traditional reviews of effectiveness, methods and filters for identifying randomised controlled trials are well established. However, qualitative research is often indexed inconsistently across databases and is difficult to pick up using free text search terms due to the use of creative titles and focus upon findings (as opposed to methods) in abstracts<sup>33</sup>. This poses difficulties when identifying qualitative research systematically<sup>34-36</sup>. Some argue for the use of a broader approach by not including filters in relation to qualitative methodology<sup>37</sup>. However, in this case a qualitative filter<sup>38</sup> was applied due to the unmanageable numbers of citations (48 000) initially returned. This potential limitation was addressed by ensuring that multiple search strategies were



1  
2  
3 used. Search terms were initially developed and run in Ovid Medline and then  
4 adapted according to the capabilities of each database. A copy of the search terms  
5 is available in the online supplementary information.  
6  
7  
8  
9

### 10 11 **Information sources**

12  
13 The following databases of published literature were searched: MEDLINE, EMBASE,  
14 PsycINFO, CINAHL, The Cochrane Library, International Bibliography of the Social  
15 Sciences (IBSS) and AMED. To limit publication bias, the following grey literature  
16 sources were searched: Index to Theses (UK dissertations and Theses), ProQuest  
17 (international dissertations and theses) and Web of Science conference proceedings.  
18 Searches were conducted week commencing 2<sup>nd</sup> February (Week 5, 2015) and  
19 databases were searched from inception. To ensure that the search was  
20 comprehensive, other search strategies were also implemented including; 1)  
21 Reviewing the reference lists of studies meeting inclusion criteria, 2) reverse citation  
22 search of studies meeting inclusion criteria and 3) reference list check and reverse  
23 citation search of an existing systematic review of qualitative literature in stroke care  
24  
25  
26  
27  
28  
29  
30  
31  
32  
33  
34  
35  
36  
37  
38  
39  
40  
41  
42  
43  
44  
45  
46  
47  
48  
49  
50  
51  
52  
53  
54  
55  
56  
57  
58  
59  
60

### **Study selection and data extraction**

Studies were screened and selected firstly based upon title and abstract review and then selected following full text review. Title and full text screening and selection was performed independently by the first author and another researcher for all studies. Discrepancies were resolved by consensus with the second and third authors.

Data extracted included study aim(s), participant characteristics (age, gender, type of communication difficulty, time post-stroke), sample size, country, study setting and methodology (method of data collection, method of analysis). Findings of included studies were also used to inform the thematic synthesis (see data synthesis). Double data extraction was completed for 30% of the included studies and compared to ensure agreement levels were high.

## Quality assessment

There is substantial debate concerning the criteria that should be used to determine study quality in qualitative research<sup>40</sup>. The National Institute for Health and Care Excellence (NICE) public health guidance qualitative appraisal checklist<sup>41</sup> was used for assessment of methodological quality in the current review. NICE created the checklist based upon the broad issues which are generally accepted to affect validity in qualitative research<sup>41</sup>. The checklist comprises of 14 domains including theoretical rationale (appropriateness, clarity), study design, data collection, trustworthiness (role of the researcher, context, reliable methods), analysis (rigorous, rich data, reliable, convincing, relevance to aims), conclusions and ethics. The researcher may endorse the presence or absence of the domain characteristic or mark as unclear/not reported. The checklist also has an overall assessment of study quality which can be marked (++) 'All or most of the checklist criteria have been fulfilled, where they have not been fulfilled the conclusions are very unlikely to alter' or (+) 'Some of the checklist criteria have been fulfilled, where they have not been fulfilled, or not adequately described, the conclusions are unlikely to alter' or (-) 'Few or no checklist criteria have been fulfilled and the conclusions are likely or very likely to alter'. In addition to being completed by one researcher, quality assessment was performed by a second researcher for 30% of the included studies. Discrepancies were resolved by discussion and consensus by a third reviewer and remaining quality assessments were revised in line with the discussion to ensure consistency.

Quality assessment was not used to exclude studies but to highlight potential limitations of the research. Although all studies were included in the data synthesis, the findings of lower quality studies were reviewed to ensure that they did not contradict the findings of higher quality studies and to ensure that they did not make a disproportionate contribution to the development of the thematic synthesis.

## Data synthesis

There is no consensus on the most appropriate method for the synthesis of qualitative data<sup>34 42</sup> and a number of approaches have been developed including

1  
2  
3 qualitative meta-synthesis<sup>43</sup>, meta-ethnography<sup>30 31</sup> and thematic synthesis<sup>32 37</sup>. In  
4 this review studies were combined using thematic synthesis<sup>32 37</sup>. This method of  
5 synthesis was specifically formulated by the Evidence for Policy and Practice  
6 Information and Co-ordinating Centre (EPPI centre) to organise findings from  
7 qualitative literature to enable reasoned hypotheses about intervention need,  
8 appropriateness and acceptability<sup>44</sup>. Like meta-synthesis and meta-ethnography,  
9 thematic synthesis allows for a deeper exploration of findings which goes beyond  
10 narrative summary<sup>32 37</sup>. Unlike meta-synthesis and meta-ethnography, thematic  
11 synthesis transparently reports the descriptive and interpretive levels of synthesis;  
12 distinguishing between the 'data-driven' descriptive themes and 'theory-driven'  
13 analytical themes. In thematic synthesis, the review question provides the theoretical  
14 framework to drive the development of the analytical themes. This differs from other  
15 methods of synthesis (e.g. grounded theory or meta-ethnography) which focus upon  
16 theory generation without a pre-existing framework and without the explicit intention  
17 to inform intervention development<sup>30 45</sup>.  
18  
19  
20  
21  
22  
23  
24  
25  
26  
27  
28  
29  
30

31 Key findings (supported by relevant quotations) from each included study were  
32 extracted and free coded line by line using QSR NVivo software version 10. Groups  
33 of descriptive codes were formed based on similarities between the free codes.  
34 Through discussion with a second reviewer and a wider review team, the contents of  
35 each of the groups of descriptive codes were explored and further refined to create  
36 descriptive themes<sup>32 37</sup>. Analytical themes were developed through an iterative  
37 process which included discussion of the links between the descriptive themes and  
38 the implications of these upon the needs of stroke survivors with communication  
39 difficulties and future intervention development<sup>24 32 46</sup>. Analytical themes were  
40 developed with help from the wider review team and by gaining feedback on draft  
41 analytical themes from a peer review group in the research unit.  
42  
43  
44  
45  
46  
47  
48  
49  
50  
51  
52  
53  
54  
55  
56  
57  
58  
59  
60

## RESULTS

### [Figure 1: PRISMA flow diagram of study selection]

Thirty-two citations were identified which were eligible for inclusion in the review<sup>47-78</sup>. The PRISMA flow diagram of study selection is shown in figure 1. Once duplicates had been removed, 9496 records were screened for eligibility and full text was sought for 80 citations. 48 were excluded; 21 studies which did not focus upon the outcome of interest<sup>79-99</sup>, 11 studies which did not use qualitative methods or qualitative methods of data analysis<sup>100-110</sup>, 6 which were not original research (e.g. were commentaries or book reviews)<sup>111-116</sup>, 4 for which we were unable to obtain full text<sup>117-120</sup>, 3 which did not include the population of interest<sup>121-123</sup>, and 3 ongoing pieces of research for which the results were not yet available<sup>124-126</sup>.

### Study characteristics

Table 1 shows the characteristics of included studies.

The experiences of 518 stroke survivors with communication difficulties were reported. Studies reporting gender included 249 male and 220 female participants; ages ranged from 29 to 91. Sample sizes ranged from three<sup>59 103</sup> to fifty<sup>73 78</sup>. The majority of studies identified included participants with aphasia (29 out of 32). Only five studies reported including participants with dysarthria<sup>47-49 58 77</sup> and one study included participants with apraxia of speech<sup>47</sup>. The time post-stroke varied; the participants in 21 studies had a mean time post-stroke of more than 12 months and the participants in five studies had a mean time post-stroke of less than 12 months<sup>48 58 61 62 76</sup>.

**Table 1:** Characteristics of included studies

| Authors                     | Aim of study                                                                                                                                                                   | L&C difficulty                         | Size | Country   | Setting   | Age range | Gender               | Time post-stroke                            | Method of data collection                        | Time points    | Method of analysis                     | Overall assessment of methodological quality |
|-----------------------------|--------------------------------------------------------------------------------------------------------------------------------------------------------------------------------|----------------------------------------|------|-----------|-----------|-----------|----------------------|---------------------------------------------|--------------------------------------------------|----------------|----------------------------------------|----------------------------------------------|
| Baylor et al. <sup>47</sup> | To explore the similarities and differences in self-reported restrictions in communicative participation across different communication disorders in community-dwelling adults | Aphasia, Apraxia of Speech, Dysarthria | 44   | USA       | Community | 37-88     | 21 male<br>23 female | Mean 8.2 years (SD 7.4, range 0.5-24)       | Interview                                        | One interview  | Content analysis                       | -                                            |
| Brady et al. <sup>49</sup>  | To explore the impact of dysarthria on social participation following stroke                                                                                                   | Dysarthria                             | 24   | UK        | Community | 34-86     | 15 male<br>9 female  | Mean (months) 8 (SD 7, range 2-34)          | Interview                                        | One interview  | Grounded theory                        | +                                            |
| Brady et al. <sup>48</sup>  | To explore the perceptions of people with stroke-related dysarthria in relation to the management and rehabilitation of dysarthria                                             | Dysarthria                             | 24   | UK        | Community | 34-86     | 15 male<br>9 female  | Up to 3 years (mean not reported)           | Interview                                        | One interview  | Grounded theory                        | +                                            |
| Brown et al. <sup>51</sup>  | To explore from the perspectives of people with aphasia, the meaning of living successfully with Aphasia                                                                       | Aphasia                                | 25   | Australia | Community | 38-86     | 13 male<br>12 female | Mean (months): 71.5 (SD 62.3, range 24-299) | Interviews and participant generated photography | Two interviews | Interpretive phenomenological analysis | ++                                           |
| Brown et al. <sup>52</sup>  | To explore from the perspectives of family members of individuals with aphasia, the meaning of living successfully with aphasia                                                | Aphasia                                | 24   | Australia | Community | 40-87     | 9 male<br>15 female  | n/a                                         | Interview                                        | One interview  | Interpretive phenomenological analysis | ++                                           |
| Brown et al. <sup>50</sup>  | To explore the perspectives of 25 community dwelling individuals with chronic aphasia on the role of friendship in living successfully with aphasia                            | Aphasia                                | 25   | Australia | Community | 38-86     | 13 male<br>12 female | Mean (months): 71.5 (SD 62.3, range 24-299) | Interviews and participant generated photography | Two interviews | Thematic analysis                      | +                                            |

Table 1: Characteristics of included studies (continued)

| Authors                       | Aim of study                                                                                                                                                                                                       | L&C difficulty | Size | Country         | Setting   | Age range | Gender               | Time post-stroke                          | Method of data collection                                                                                       | Time points                                                                                    | Method of analysis                                                                         | Overall assessment of methodological quality |
|-------------------------------|--------------------------------------------------------------------------------------------------------------------------------------------------------------------------------------------------------------------|----------------|------|-----------------|-----------|-----------|----------------------|-------------------------------------------|-----------------------------------------------------------------------------------------------------------------|------------------------------------------------------------------------------------------------|--------------------------------------------------------------------------------------------|----------------------------------------------|
| Cruice et al. <sup>53</sup>   | To explore how older people with chronic aphasia who are living in the community describe their quality of life in terms of what contributes and what detracts from the quality in their current and future lives. | Aphasia        | 30   | Australia       | Community | 57-88     | 14 male<br>16 female | Mean (months): 41 (SD 25.6, range 10-108) | Interview                                                                                                       | One interview                                                                                  | Content analysis                                                                           | +                                            |
| Cyr <sup>54</sup>             | To investigate factors associated with resilience in individuals with aphasia                                                                                                                                      | Aphasia        | 9    | USA             | Community | 47-73     | ?                    | ?                                         | Interview                                                                                                       | One interview                                                                                  | Content analysis                                                                           | -                                            |
| Dalemans et al. <sup>55</sup> | To explore how people with aphasia perceive participation in society and to investigate influencing factors.                                                                                                       | Aphasia        | 13   | The Netherlands | Community | 45-71     | 7 male<br>6 female   | Range (years): 1-11                       | Interview and Diary                                                                                             | One interview. Diary kept for 2 weeks prior to interview.                                      | ?                                                                                          | ++                                           |
| Davidson et al. <sup>56</sup> | The aims were to describe everyday communication with friends for older people with and without aphasia and to examine the nature of actual friendship conversations involving a person with aphasia.              | Aphasia        | 15   | Australia       | Community | 64-80     | 7 male<br>8 female   | Mean (months) 42.13 (SD 27.70)            | Observation and communication diary (Phase One)<br>Qualitative interview data from simulated recall (Phase Two) | 3 separate observations for a total of 8 hours on one week<br>Diary kept on 5 consecutive days | Inductive interpretive analysis (Phase One)<br>Systematic qualitative analysis (Phase Two) | +                                            |

Table 1: Characteristics of included studies (continued)

| Authors                       | Aim of study                                                                                                                                                                                                                                                                                                                                                            | L&C difficulty | Size | Country   | Setting   | Age range | Gender              | Time post-stroke                   | Method of data collection | Time points                                                                                                                                                                                      | Method of analysis                                                                                                                    | Overall assessment of methodological quality |
|-------------------------------|-------------------------------------------------------------------------------------------------------------------------------------------------------------------------------------------------------------------------------------------------------------------------------------------------------------------------------------------------------------------------|----------------|------|-----------|-----------|-----------|---------------------|------------------------------------|---------------------------|--------------------------------------------------------------------------------------------------------------------------------------------------------------------------------------------------|---------------------------------------------------------------------------------------------------------------------------------------|----------------------------------------------|
| Davidson et al. <sup>57</sup> | To explore the insider perspective on the impact of aphasia on social communication and social relationships, and to explore components of the interactional function of everyday communication that are identified by older people with aphasia.                                                                                                                       | Aphasia        | 3    | Australia | Community | 69-84     | 1 male<br>2 female  | ?                                  | Interviews and Diary data | One qualitative interview, One stimulated recall interview regarding a previously videotaped recording of an interaction with a communication partner, Diary about communication kept for 7 days | Qualitative interview and stimulated recall interview:<br>Framework Analysis<br><br>Diary: analysed following guidance by Code (2003) | +                                            |
| Dickson et al. <sup>58</sup>  | To investigate the beliefs and experiences of people with dysarthria as a result of stroke in relation to their speech disorder, and to explore the perceived physical, personal and psychosocial impacts of living with dysarthria.                                                                                                                                    | Dysarthria     | 24   | UK        | Community | 34-86     | 15 male<br>9 female | Mean (months)<br>7.07 (range 2-34) | Interview                 | One interview                                                                                                                                                                                    | Grounded theory                                                                                                                       | +                                            |
| Dietz et al. <sup>59</sup>    | The aim of this phenomenological case study was to (a) explore the social role changes experienced by people with aphasia (PWA), (b) understand the use of communication strategies when attempting to reclaim previous roles, and (c) determine whether discrepancies existed between PWA and their potential proxies regarding social role change changes/adaptations | Aphasia        | 3    | USA       | Community | 41-85     | 2 male<br>1 female  | Range (months):<br>24-180          | Interview                 | One interview                                                                                                                                                                                    | Interpretative Phenomenological Analysis                                                                                              | +                                            |

**Table 1:** Characteristics of included studies (continued)

| Authors                       | Aim of study                                                                                                                                                                           | L&C difficulty | Size | Country         | Setting   | Age range | Gender               | Time post-stroke                           | Method of data collection                 | Time points                          | Method of analysis | Overall assessment of methodological quality |
|-------------------------------|----------------------------------------------------------------------------------------------------------------------------------------------------------------------------------------|----------------|------|-----------------|-----------|-----------|----------------------|--------------------------------------------|-------------------------------------------|--------------------------------------|--------------------|----------------------------------------------|
| Fotiadou et al. <sup>60</sup> | To explore the impact of stroke and aphasia on a persons relationships with family, friends and the wider network through analysing blogs written by people with aphasia               | Aphasia        | 10   | USA, UK, Turkey | Community | 29-69     | 4 male<br>6 female   | At least one year (mean not reported)      | Analysis of online blogs                  | n/a                                  | Framework analysis | ++                                           |
| Grohn et al. <sup>62</sup>    | To describe the experience of the first 3 months post-stroke in order to identify factors which facilitate successfully living with aphasia                                            | Aphasia        | 15   | Australia       | Community | 47-90     | 8 male<br>7 female   | 3 months ( $\pm 2$ weeks)                  | Interview                                 | 3 months post-stroke                 | Thematic analysis  | ++                                           |
| Grohn et al. <sup>61</sup>    | To describe the insiders perspective of what is important to living successfully with aphasia and changes that occur throughout the first year post-stroke                             | Aphasia        | 15   | Australia       | Community | 47-90     | 8 male<br>7 female   | 3, 6, 9, 12 months                         | Interviews                                | 3, 6, 9, 12 months post-stroke       | Thematic analysis  | ++                                           |
| Hinckley <sup>127</sup>       | The question "what does it take to live successfully with aphasia?" was posed and answers sought within already published accounts written by people living successfully with aphasia. | Aphasia        | 20   | ?               | Community | ?         | ?                    | ?                                          | Analysis of published personal narratives | N/A                                  | Thematic analysis  | +                                            |
| Howe et al. <sup>65</sup>     | To explore the environmental factors that hinder or support the community participation of adults with aphasia                                                                         | Aphasia        | 25   | Australia       | Community | 34-85     | 15 male<br>10 female | Mean (months) 66.6 (SD 34.4, range 10-137) | Interviews                                | One interview                        | Content analysis   | ++                                           |
| Howe et al. <sup>64</sup>     | To explore the environmental factors that hinder or support the community participation of adults with aphasia.                                                                        | Aphasia        | 10   | Australia       | Community | 35-72     | 6 male<br>4 female   | Mean (months) 97.1 (SD 29.2, range 51-155) | Observation                               | Approximately 3 hours of observation | Content analysis   | ++                                           |



Table 1: Characteristics of included studies (continued)

| Authors                             | Aim of study                                                                                                                                                                                                                                                                                                                      | L&C difficulty | Size | Country | Setting   | Age range | Gender               | Time post-stroke                  | Method of data collection | Time points     | Method of analysis | Overall assessment of methodological quality |
|-------------------------------------|-----------------------------------------------------------------------------------------------------------------------------------------------------------------------------------------------------------------------------------------------------------------------------------------------------------------------------------|----------------|------|---------|-----------|-----------|----------------------|-----------------------------------|---------------------------|-----------------|--------------------|----------------------------------------------|
| Johansson et al. <sup>66</sup>      | To explore how people with aphasia experience having conversations, how they handle communication difficulties and how they perceive their own and their communication partners use of communication strategies                                                                                                                   | Aphasia        | 11   | Sweden  | Community | 48-79     | 7 male<br>4 female   | Mean (months) 38 (range 13-75)    | Interviews                | One interview   | Content analysis   | ++                                           |
| Le Dorze and Brassard <sup>68</sup> | (1) To understand the consequences of aphasia in the terms used by aphasic persons and their friends and relatives to describe their experience of this communication disorder<br>(2) To qualitatively analyse and structure the different descriptions with the concepts of impairment, disability handicap and coping behaviour | Aphasia        | 9    | Canada  | Community | 44-69     | 5 male<br>4 female   | Mean (years) 5.5 (range 2-14)     | Interviews                | One interview   | Grounded Theory    | +                                            |
| Le Dorze et al. <sup>67</sup>       | To explore with a qualitative approach the experience of auditory comprehension problems from the perspective of aphasic persons and their family and friends                                                                                                                                                                     | Aphasia        | 24   | Canada  | Community | 33-71     | 10 male<br>14 female | Mean (months) 55.96 (range 4-147) | Focus group               | One focus group | Phenomenological   | -                                            |
| Le Dorze et al. <sup>69</sup>       | To explore the factors that facilitate or hinder participation according to people who live with aphasia                                                                                                                                                                                                                          | Aphasia        | 17   | Canada  | Community | 51-84     | 12 male<br>5 female  | Mean (years) 5.7 (range 2-18)     | Focus group               | One focus group | Content analysis   | +                                            |

Table 1: Characteristics of included studies (continued)

| Authors                           | Aim of study                                                                                                                                                               | L&C difficulty | Size | Country  | Setting   | Age range | Gender               | Time post-stroke                           | Method of data collection       | Time points                                                                                                                        | Method of analysis                  | Overall assessment of methodological quality |
|-----------------------------------|----------------------------------------------------------------------------------------------------------------------------------------------------------------------------|----------------|------|----------|-----------|-----------|----------------------|--------------------------------------------|---------------------------------|------------------------------------------------------------------------------------------------------------------------------------|-------------------------------------|----------------------------------------------|
| Matos et al. <sup>70</sup>        | To explore and understand the perspectives of Portuguese people with aphasia, family members and speech and language therapists                                            | Aphasia        | 14   | Portugal | Community | 41-80     | 11 male<br>3 female  | Mean (months)<br>27.57 (range 3-89)        | Group and individual interviews | Participants with mild to moderate aphasia were interviewed as a group and those with severe aphasia were interviewed individually | Thematic analysis                   | +                                            |
| Natterlund <sup>71</sup>          | To describe aphasic individuals' experiences of everyday activities and social support in daily life                                                                       | Aphasia        | 20   | Sweden   | Community | 32-70     | 14 male<br>6 female  | Mean (years)<br>6.52 (range 3 to 11 years) | Interview                       | One interview                                                                                                                      | Content analysis                    | ++                                           |
| Niemi and Johansson <sup>72</sup> | To describe and explore how persons with aphasia following stroke experience engaging in everyday occupations                                                              | Aphasia        | 6    | Finland  | Community | 46-75     | 3 male<br>3 female   | Mean (years)<br>2.5 (range 1-4)            | Interviews                      | 2-3 interviews over two months                                                                                                     | Empirical phenomenological analysis | +                                            |
| Parr <sup>73</sup>                | To describe the consequences and significance of long-term aphasia                                                                                                         | Aphasia        | 50   | UK       | Community | ?         | 28 male<br>22 female | Mean (years)<br>7.7 (range 5-21)           | Interview                       | One interview                                                                                                                      | Framework method                    | +                                            |
| Parr <sup>74</sup>                | To track the day-to-day life and experiences of people with severe aphasia, and to document levels of social inclusion and exclusion as they occurred in mundane settings. | Aphasia        | 20   | UK       | Community | 33-91     | 11 male<br>9 female  | Mean (years)<br>4.67 (range 0.9-15)        | Ethnography                     | Visited and observed 3 times in different domestic and care settings                                                               | Framework method                    | -                                            |

**Table 1:** Characteristics of included studies (continued)

| Authors                      | Aim of study                                                                                                                                                                                                                      | L&C difficulty         | Size | Country   | Setting   | Age range | Gender                                         | Time post-stroke                                            | Method of data collection          | Time points                                 | Method of analysis           | Overall assessment of methodological quality |
|------------------------------|-----------------------------------------------------------------------------------------------------------------------------------------------------------------------------------------------------------------------------------|------------------------|------|-----------|-----------|-----------|------------------------------------------------|-------------------------------------------------------------|------------------------------------|---------------------------------------------|------------------------------|----------------------------------------------|
| Pound <sup>75</sup>          | To investigate how people with aphasia understand friends and friendship                                                                                                                                                          | Aphasia                | 28   | UK        | Community | ?         | Phase one: 6 male 6 female<br><br>Phase two: ? | Phase one: Mean (years) 7.46 (range 1.5-20)<br>Phase two: ? | Interview                          | One interview per participant in each phase | Thematic analysis            | ++                                           |
| Pringle et al. <sup>76</sup> | To gain a greater understanding of the experience of returning home for stroke survivors and their carers.                                                                                                                        | Aphasia                | 4    | UK        | Community | ?         | ?                                              | 1 month                                                     | Interviews and self-report diaries | One interview and diary                     | Phenomenological approach    | -                                            |
| Runne <sup>77</sup>          | To examine the relationship between self-efficacy and a person's choice to participate in life roles involving communication by inviting the experts (i.e. people with speech and language disorders) to share their experiences. | Aphasia and Dysarthria | 5    | USA       | Community | 51-69     | 2 male<br>3 female                             | Mean (years) 8 (range 3-14)                                 | Interview                          | One interview                               | Thematic analysis            | -                                            |
| Worrall et al. <sup>78</sup> | The purpose of this study was to describe the goals of people with aphasia and to code the goals according to the ICF                                                                                                             | Aphasia                | 50   | Australia | Community | ?         | 24 male<br>26 female                           | Mean (months) 54.9 (SD 43.6)                                | Interview                          | One interview                               | Qualitative content analysis | +                                            |

Key: [ ? : Insufficient information]

## Methodological quality of included studies

Table 2 shows the results from the NICE public health qualitative appraisal checklist<sup>41</sup>. A table showing individual study ratings is included in the online supplementary material.

**Table 2:** Methodological quality of included studies

|                                            |                        |                      |                                     |
|--------------------------------------------|------------------------|----------------------|-------------------------------------|
| 1. Theoretical rationale: appropriateness  | Appropriate<br>32      | Inappropriate<br>0   | Not sure<br>0                       |
| 2. Theoretical rationale: clarity          | Clear<br>28            | Unclear<br>1         | Mixed<br>3                          |
| 3. Study design                            | Defensible<br>21       | Indefensible<br>4    | Not sure<br>7                       |
| 4. Data collection                         | Appropriately<br>30    | Inappropriately<br>1 | Not sure/inadequately reported<br>1 |
| 5. Trustworthiness: role of the researcher | Clearly described<br>5 | Unclear<br>2         | Not described<br>25                 |
| 6. Trustworthiness: context                | Clear<br>27            | Unclear<br>5         | Not Sure<br>0                       |
| 7. Trustworthiness: Reliable methods       | Reliable<br>29         | Unreliable<br>1      | Not sure<br>2                       |
| 8. Analysis: Rigorous                      | Rigorous<br>20         | Not rigorous<br>2    | Not sure/not reported<br>10         |
| 9. Analysis: Rich data                     | Rich<br>22             | Poor<br>8            | Not sure/not reported<br>2          |
| 10. Analysis: Reliable                     | Reliable<br>17         | Unreliable<br>1      | Not sure/not reported<br>14         |
| 11. Analysis: Convincing                   | Convincing<br>22       | Not convincing<br>5  | Not sure<br>5                       |
| 12. Analysis: Relevance to aims            | Relevant<br>28         | Irrelevant<br>0      | Partially Relevant<br>4             |
| 13. Conclusions                            | Adequate<br>28         | Inadequate<br>3      | Not sure<br>1                       |
| 14. Ethics                                 | Appropriate<br>20      | Inappropriate<br>1   | Not sure/not reported<br>11         |
| Overall assessment                         | ++<br>12               | +<br>14              | -<br>6                              |

1  
2  
3 The majority of studies performed well across the domains. Studies performed less  
4 well in domain 5 (Trustworthiness: role of the researcher). In this domain, only five  
5 out of 32 studies reflected upon the role of the researcher in the research<sup>51 61 64 65 72</sup>.  
6  
7 In just under half of the studies (14 out of 32) it was unclear if the methods used for  
8 the analysis were reliable (domain 10)<sup>48 49 56-59 64 66 71-74 76 78</sup>. Eight studies were  
9 classified as having 'poor' quality data in domain 9 (Analysis: Rich data) failing to  
10 provide enough depth and detail to provide convincing insight in to participants  
11 experiences<sup>47 53 54 67 68 70 76 78</sup>. In 11 studies the ethical implications of the research  
12 were not adequately reported<sup>47 52 56 57 59 63 67 68 73 77 78</sup>.  
13  
14  
15  
16  
17  
18  
19  
20

21 Six studies were scored in the lowest category for the overall assessment (-)<sup>47 54 67 74</sup>  
22<sup>76 77</sup>. Of these, three studies were very narrow in description and lacked richness in  
23 the data presented<sup>47 67 76</sup>. The remaining three studies<sup>54 74 77</sup> were problematic in  
24 their overall conclusions. 26 out of 32 studies were scored in the (+) or (++)  
25 categories, suggesting that they scored satisfactorily on most items of the checklist  
26 or where they had not, the conclusions of the study were unlikely to be altered.  
27  
28  
29  
30  
31  
32  
33  
34

### 35 **Thematic synthesis**

36  
37 The progression from descriptive to analytical themes is illustrated in figure 2. Free  
38 coding the findings of included studies produced 597 meaningful segments of data;  
39 these were grouped together according to similarity and new descriptive categories  
40 were created to capture the meaning of the grouped free codes. For example, free  
41 codes which captured emotions (such as loss, anger and sadness) related to the  
42 struggle to communicate were grouped to form the descriptive category 'Emotions  
43 associated with struggle to communicate'. The initial codes were grouped in to 22  
44 descriptive group categories. Meanings were refined and themes developed by  
45 reassessing the data contained within each category to create descriptive themes.  
46  
47 For example, an overlap in experiences was seen between the emotions associated  
48 with struggle to communicate and the self-identity category. This developed in to the  
49 descriptive theme of 'loss of communication and the loss of self-identity'. Although  
50 the current review aimed to identify the needs of stroke survivors with  
51  
52  
53  
54  
55  
56  
57  
58  
59  
60

1  
2  
3 communication difficulties, the studies identified did not ask participants directly  
4 about their needs and participants did not describe their experiences in terms of  
5 need. However, based upon the experiences described, analytical themes were  
6 developed which inferred and theorised about the needs of stroke survivors with  
7 communication difficulties and the impact this may have upon future intervention  
8 development<sup>32 37</sup>.  
9  
10  
11  
12

13  
14  
15  
16 **[Figure 2: The development of descriptive and analytical themes]**  
17  
18  
19  
20  
21  
22  
23  
24

### 25 **Descriptive themes**

26  
27  
28 Six descriptive themes were developed and are illustrated in table 3.  
29  
30  
31  
32  
33  
34  
35  
36  
37  
38  
39  
40  
41  
42  
43  
44  
45  
46  
47  
48  
49  
50  
51  
52  
53  
54  
55  
56  
57  
58  
59  
60

Table 3: Descriptive Themes

|                                                                      | Descriptive Theme                                                                                                                                                                                                                                                                                                                                                                                                                                                                                                                                                                                                                                                                                                                                                                                                                                                                                                                      | Illustrative quote (s)                                                                                                                                                                                                                                                                                                                                                                                                                        |
|----------------------------------------------------------------------|----------------------------------------------------------------------------------------------------------------------------------------------------------------------------------------------------------------------------------------------------------------------------------------------------------------------------------------------------------------------------------------------------------------------------------------------------------------------------------------------------------------------------------------------------------------------------------------------------------------------------------------------------------------------------------------------------------------------------------------------------------------------------------------------------------------------------------------------------------------------------------------------------------------------------------------|-----------------------------------------------------------------------------------------------------------------------------------------------------------------------------------------------------------------------------------------------------------------------------------------------------------------------------------------------------------------------------------------------------------------------------------------------|
| <p>10 <b>Coming to terms with the loss of communication</b></p>      | <p>The extent to which stroke survivors reported being able to come to terms with a communication impairment varied<sup>51 53 54 59 60 63 70 72</sup>. For some the struggle to communicate was an ongoing source of emotional distress, triggering feelings of grief, loss and sadness. However, others had successfully come to terms with their communication impairments. These participants recognised the changes that had taken place in their lives but had been able to adjust to these and find contentment.</p>                                                                                                                                                                                                                                                                                                                                                                                                             | <p><i>What if you only could! Could talk! That's what I ... Everything' (pg. 149)<sup>66</sup></i></p> <p><i>'And I know it'll never be the same as what I was before I had the stroke . . . And as I say I hate to accept it, but I've got to accept it.' (p.1283)<sup>51</sup></i></p>                                                                                                                                                      |
| <p>17 <b>Loss of communication and the loss of self-identity</b></p> | <p>Communication was often linked to participants sense of self. Being able to communicate as before was regarded as being 'normal'<sup>49 58</sup> and since stroke some participants described feeling as though a piece of themselves was missing. Stroke survivors were conscious of the deficiencies in their speech The constant monitoring and evaluation of speech was also linked to negative self-evaluation when stroke survivors fell short of their own expectations.</p>                                                                                                                                                                                                                                                                                                                                                                                                                                                 | <p><i>'at least 50 percent of me vanished when speech vanished that that's how I think about it' (p. 1831)<sup>72</sup></i></p> <p><i>'... I hate myself because I can't speak right...' (p. 143)<sup>58</sup></i></p>                                                                                                                                                                                                                        |
| <p>22 <b>Isolation and exclusion from social situations</b></p>      | <p>Participants felt left out of social situations or ignored or excluded specifically due to their communication problems<sup>47-49 55 56 58-60 64-72 74</sup>. The discomfort others felt in talking to stroke survivors with communication difficulties was apparent to the stroke survivor themselves and led to feelings of social isolation. Participants expressed particular difficulty in taking part in group situations<sup>55 60 67-69</sup>. As a consequence, people with post-stroke communication difficulties described either withdrawing from or avoiding communication or social situations altogether<sup>47-49 58-60 67 69 70</sup>. Feelings of embarrassment and a lack of confidence in communication contributed to participant's avoidance of social events<sup>49</sup>. One participant also suggests that fear of stigmatizing reactions contributed to avoidance of social situations<sup>49</sup>.</p> | <p><i>'It's my wife who says I'm antisocial because, even when I visit my in-laws, I'm sick of going to their parties, sit in a corner, and at the end of the party, I get up and leave. I haven't said a damn word in there, and no one was interested, talked to me.' (p.431)<sup>69</sup></i></p> <p><i>'Instead, they would "go into the background and retreat".... and "do the bare amount of talking"...' (p.275)<sup>47</sup></i></p> |
| <p>33 <b>A support network of family and friends</b></p>             | <p>Family members were discussed as an ongoing support on a practical and emotional level<sup>61 69</sup>. Although some survivors did rely more on family members for support since having their stroke, reliance on others was not desired by stroke survivors or their carers<sup>55 59 60 62 66 69 72 78</sup>. The importance of friendship and social support outside the family was also expressed by stroke survivors with communication impairments<sup>50-54 56 60 62 63 71 75</sup>. However, also prominent was the difficulty maintaining friendships and the loss of friendship post-stroke<sup>51 55 60 68-71 74 75</sup>.</p>                                                                                                                                                                                                                                                                                          | <p><i>'The informants mentioned that being dependent on their partners was frustrating. Having their partner always nearby brought security but it also made them feel that they were being a burden.' (p. 150)<sup>66</sup></i></p> <p><i>'...Friends stayed away because they didn't know how to handle the new situation. When time passed by, making contact became even more difficult...' (p. 543)<sup>55</sup></i></p>                 |

1  
2  
3  
4  
5  
6 **Strategies to**  
7 **facilitate**  
8 **successful**  
9 **communication**

Some stroke survivors with communication difficulties used their own strategies to help facilitate conversation<sup>47 48 51 55 59 64 66 68 77</sup>. A wide range of strategies were identified including communication aids<sup>48 51 55 59</sup>, drawing or writing information down<sup>48 51 66</sup> and signalling by raising a hand that they have something to add when in a group situation<sup>47 48 68</sup>. However, some studies identified a stigma attached to using communication aids<sup>55 66</sup>. Strategies used by communication partners of people with post-stroke communication difficulties were also recognised as a facilitator to successful communication<sup>48 51 55-57 62 64 66 67 72 73 76 77</sup>.

*"Interviewer: do you use a communication book? Liv: no, people look strange." (p. 544)<sup>55</sup>*

*'Equally important were the degree to which the CPs were able to adapt their speaking behaviour and whether they used supportive conversation strategies. "Then she wrote! Keywords like this. --- She wrote for me, you see. --- That was damn good, and then I understood at once!"... (p. 1287)<sup>51</sup>*

14 **Activity and**  
15 **meaningful**  
16 **participation in**  
17 **life**

A distinction can be made between stroke survivors who took part in activities they enjoyed or which were meaningful to them and those who no longer took part and remained largely inactive. Where stroke survivors engaged in activities they valued, a sense of achievement, purpose, pleasure and confidence was expressed<sup>48 51 52 54 55 61 62 75</sup>. Establishing a routine was important to stroke survivors with aphasia. Again this gave stroke survivors a sense of purpose and achievement which was not evident in the experiences of those participants where activity had decreased post-stroke<sup>53 59 60 68 70-72 74</sup>.

*'Be involved with everything.' 'Have a hobby.' 'Live as much as you can; do as much as you can.' (p. 1277)<sup>51</sup>*

*'When able to establish a routine and engage in activities around the home, participants often obtained a sense of ability, competency, and independence: "I can do everything for myself" and "I can do it myself. Pretty well." (p. 1415)<sup>61</sup>*



## Analytical themes

Four analytical themes were developed and are described below. It is important to note that the needs highlighted are interconnected and there is significant overlap between themes. For example, the ability to create a meaningful role may be influenced by the availability of a support network or by ability to communicate outside of the home.

### *Managing communication outside of the home*

Managing communication outside of the home was a salient issue for many of the participants in the included studies. Where difficulties with communication arose, these generally occurred away from the safety of the home environment. Many participants were self-conscious about speaking in public and some took steps to hide their communication difficulty by avoiding social interaction completely or by using the bare minimum amount of communication required<sup>48 49 55 58-60 66 68-70 73 74 76</sup>.<sup>78</sup> This protected participants from stigmatising reactions and also protected participants self-identity which was questioned when they were confronted with their communication difficulties<sup>48 49 58 72</sup>. However, by avoiding communicative situations, stroke survivors put themselves at risk of losing friendships and becoming socially isolated<sup>50 51 55 60 68-71 74 75</sup>.

In contrast, rather than avoiding communication, some stroke survivors identified the active use of strategies to adapt their communication and make themselves understood outside of the home, for example, communication aids<sup>48 51 55 59 77</sup>, drawing or writing information down<sup>48 51 66 77</sup> or signalling by raising a hand that they have something to add when in group situation<sup>47 48 68 77</sup>. Other strategies used to facilitate successful communication included sticking to familiar places or people. For example, in one study, when describing the routine of one participant going out for a coffee this was facilitated by the coffee shop staff's knowledge of that individual<sup>64</sup>. Successful interaction was often facilitated by the stroke survivors close family members, for example a participant in Brady et al.<sup>48</sup> stated '(She) [Wife] deciphers for me' (p. 945). Successful interaction could also be facilitated by a competent

1  
2  
3 conversation partner<sup>48 51 55 56 62 64 66 67 72 73 76 77</sup>. Successful interaction helped  
4 participants to gain a sense of self-confidence and self-worth:  
5  
6

7 *"It feels really nice that someone ... someone that just wants to speak with you!*  
8 *One feels like a human being. It feels 'Wow!' ..."*<sup>66</sup> (p.148).  
9  
10

11  
12  
13  
14 Future interventions should support stroke survivors to build confidence in their  
15 communicative abilities in order to re-build their sense of self. A staged programme  
16 whereby stroke survivors are supported to build confidence in their communicative  
17 abilities through setting tasks with increasing difficulty may be appropriate<sup>128</sup>. For  
18 example, the stroke survivor may progress in stages from one to one communication  
19 with someone familiar to communicating outside of the home with support to  
20 communicating outside of the home alone. Training for friends and family may also  
21 need to be considered in order to facilitate optimal communication<sup>129</sup>.  
22  
23  
24  
25  
26  
27  
28  
29

### 30 *Creating a meaningful role*

31  
32  
33 Stroke survivors who described themselves as living successfully with a  
34 communication impairment advocated 'doing things' as being central to their success  
35<sup>51 61</sup>. Meaningful activity was something which was personal to the stroke survivor  
36 and varied across the studies identified. Meaningful activity could be as simple as  
37 completing chores around the house, establishing a routine or could relate to  
38 activities outside the home. The common theme was that the activity helped the  
39 stroke survivor to have a role which they valued, which they enjoyed or which gave  
40 them a sense of purpose<sup>48 51 52 54 55 61 62 75</sup>.  
41  
42  
43  
44  
45  
46  
47  
48

49  
50 Sometimes stroke survivors struggled to participate in meaningful activities they had  
51 enjoyed prior to stroke due to their communication difficulties<sup>53 59 60 68 70-72 74</sup>. However,  
52 those who described themselves as living successfully with a communication  
53 difficulty sought and took part in other activities which they were able to participate in  
54 and found pleasurable. The flexibility to adapt, adjust and take part in meaningful  
55 activity in spite of post-stroke communication difficulties is significant. In these  
56  
57  
58  
59  
60

1  
2  
3 circumstances the stroke survivor placed value upon activities which they could  
4 participate in as opposed to those which they could not<sup>48 51 52 54 55 61 62 75</sup>. Brown et al.  
5  
6<sup>51</sup> suggest that participating in meaningful activity is a process and describe  
7  
8 participants' experiences of finding a balance between the things they could still do  
9  
10 and those they were no longer capable of.

11  
12 *"I can't read anymore . . . spelling is horrible since my stroke . . . I can't do*  
13 *whatever I used to do. And I would—I feel that I'm useless . . . [But] I'm not*  
14 *depressed and . . . I laugh . . . And I am finding that I am living successfully*  
15 *with the stroke. Yes . . . I go for a walk. I ride the bike (indicates to exercise*  
16 *bike in lounge) . . . go out shopping with my wife. And go for an overseas trip.*  
17 *And I feel alright—yes."*<sup>51</sup> (p.1279)

18  
19  
20  
21  
22  
23 This trial and error process may be important to creating a meaningful role and  
24 therefore to living successfully with post-stroke communication difficulties.

25  
26  
27  
28  
29  
30 One barrier to the creation of a meaningful role was the association between  
31 meaningful activity and communicative ability. Valued roles were often related to  
32 activities outside of the house, which stroke survivors found challenging to manage  
33 due to their communication difficulties. For example, a participant in Cruice et al.<sup>53</sup>  
34 describes his reliance on his wife for going out of the house:  
35  
36

37  
38  
39 *'[Communication] affected one man's movements in his community ("C [wife]*  
40 *and I go to town often but I don't go by myself...[aphasia] stops me going*  
41 *out...[it] depends on how people know you")'*<sup>53</sup> (p. 336).

42  
43  
44  
45 This group also experienced other practical challenges common to many stroke  
46 survivors such as physical disability, fatigue or a lack of transport<sup>59-62 71</sup> which were  
47 additional barriers to participating in meaningful activity.  
48  
49

50  
51  
52  
53 Future interventions should consider the role of meaningful activity in participants'  
54 lives. Establishing a routine or scheduling activities which are valued by the stroke  
55 survivor may be key to living successfully with communication impairment.  
56  
57 Intervention components to facilitate participation in meaningful activity may include  
58  
59  
60

1 supported activity-focused goal setting, action planning or problem solving<sup>128</sup>  
2  
3 Problem solving strategies or adaptations may be needed in order for the stroke  
4 survivor to participate in meaningful activity. This may take time and may involve trial  
5 and error process, particularly with regards to participation in activities which were  
6 valued prior to stroke and those occurring outside of the home environment.  
7  
8  
9  
10

### 11 *Creating or maintaining a support network*

12  
13  
14  
15  
16  
17 Participants readily identified the importance of their family and friends for providing  
18 support on a practical and emotional level<sup>50-54 57 60-63 69 71 75</sup>. As highlighted in the  
19 previous two analytical themes it was often necessary for the stroke survivor to have  
20 some support from family or friends in order to complete activities outside of the  
21 home successfully. This support was highly valued and often enabled participants to  
22 manage activities outside of the home which might not otherwise have been possible.  
23  
24 On the other hand, some stroke survivors discussed a lack of support, resulting in  
25 feelings of social isolation<sup>50 51 55 60 68-71 74 75</sup>. In some circumstances, participants had  
26 friends prior to the stroke that had drifted away over time<sup>50 55 74</sup>. Stroke survivors  
27 sensed that their old friends struggled to communicate with them in the same way  
28 and adapt to the new situation. Participants in the included studies described how  
29 initially friends had rallied round in the months after stroke but then gradually drifted  
30 away over time<sup>50 55 74</sup>. Dalemans et al.<sup>55</sup> describe how friends seemed reluctant to  
31 get in contact with the person with communication difficulties. This suggests some  
32 level of discomfort in accepting or adapting to the stroke survivors problems with  
33 communication:  
34  
35  
36  
37  
38  
39  
40  
41  
42  
43  
44

45 *'...Friends stayed away because they didn't know how to handle the new*  
46 *situation. When time passed by, making contact became even more difficult...'*  
47 *(p. 543)<sup>55</sup>.*  
48  
49  
50

51  
52  
53 Future interventions should recognise the value of obtaining and maintaining social  
54 support. Stroke survivors with communication difficulties may be at risk of losing  
55 friends and having reduced social networks which may impact upon quality of life  
56 and lead to social isolation. Social networks may be difficult to rebuild once lost given  
57  
58  
59  
60

1  
2  
3 the communication challenges this sub-group of stroke survivors face. Some stroke  
4 survivors had identified communication groups as a means of social support and a  
5 way of replacing some of the friends they had lost<sup>50-52 57 60 69</sup>. Stroke survivors  
6 expressed a sense of understanding from others in a similar position which was not  
7 found through other friends or family members. A focus for future interventions may  
8 be to help stroke survivors with communication difficulties to find social support or  
9 sustain their existing social networks; where this is meaningful to the stroke survivor.  
10 Future interventions should acknowledge the role of social networks and explore  
11 how these might be harnessed to further support the stroke survivor and improve  
12 quality of life<sup>130</sup>.  
13  
14  
15  
16  
17  
18  
19  
20  
21  
22

### 23 *Taking control and actively moving forward with life*

24  
25 As detailed in the descriptive themes, living with post-stroke communication  
26 difficulties had resulted in tremendous change which was often associated with loss  
27 for participants compared to pre-stroke life, for example; loss of communication, loss  
28 of self-identity, loss of friendship, and loss of previously valued activities. For many  
29 stroke survivors the sense of loss was, unsurprisingly, associated with significant  
30 emotional distress, triggering feelings of grief, loss and sadness<sup>50 51 60 61 66 72 75 78</sup>.  
31 Many of these changes were beyond the stroke survivor's control, however, in  
32 studies where stroke survivors described themselves as living successfully with the  
33 condition, a sense of taking control and actively moving forward was apparent<sup>48 55 61</sup>  
34<sup>69</sup>. For example, one participant in Grohn et al.<sup>61</sup> stated:  
35  
36  
37  
38  
39  
40  
41  
42

43 *“But I want to improve myself, even if I wasn't um like I am now and I was*  
44 *back to the way I was, I'd still push myself all the time. But they think that I'm*  
45 *pushing myself too hard sometimes [slight laugh]. But I don't think so. I just*  
46 *think I've got to learn to do these things and I think well I'm going to do it.”*  
47  
48  
49  
50 (p.1414).  
51

52 This participant was highly motivated to improve; the authors of the paper state that  
53 the participant uses 'improve' in reference to both their communicative and physical  
54 abilities. Also apparent within this quote is the participant's belief in their own ability  
55 to improve and how the participant 'pushes' to improve on the basis of this belief. A  
56  
57  
58  
59  
60

1  
2  
3 sense of taking control was also linked to independence. Participants in Brown et al.  
4<sup>51</sup> valued tasks they could complete alone, for example, ordering a meal by  
5  
6 themselves at a restaurant;  
7

8  
9 *“If you’re going out for dinner . . . make sure that you are . . . you do it. With*  
10 *yourself”* (p.1278).  
11

12  
13 A participant in Grohn et al.<sup>62</sup> describes how they perceived themselves to be living  
14 successfully with aphasia because they were able to do things independently;  
15

16  
17 *“...because I live on my own and that and I get up, I’m gone out of the place,*  
18 *and I get along-do everything myself and that.”* (p. 394).  
19

20  
21  
22  
23  
24 Future interventions should be mindful of the significant loss and emotional upheaval  
25 associated with post-stroke communication difficulties and recognise that stroke  
26 survivors may be at different stages of coming to terms with the changes to their  
27 lives. Different interventions may be appropriate according to the stroke survivors  
28 ‘readiness’ to accept their communication difficulties and move forward with  
29 rebuilding their lives<sup>131 132</sup>. Participants’ beliefs in their own ability may also be  
30 related to the sense of taking control. Such experiences sit well with self-efficacy  
31 theory<sup>133</sup> which proposes that a persons belief about their capabilities influences  
32 their ability to perform a task. Future interventions may wish to consider components  
33 which are targeted towards enhancing self-efficacy.  
34  
35  
36  
37  
38  
39  
40  
41  
42  
43  
44  
45  
46  
47  
48  
49  
50  
51  
52  
53  
54  
55  
56  
57  
58  
59  
60

## DISCUSSION

The review identified 32 qualitative studies including 518 stroke survivors with communication difficulties from 9 different countries. Synthesising information from the qualitative literature has provided considerable insight into the longer-term needs of stroke survivors with communication difficulties living in the community. The synthesis reveals the ongoing difficulties stroke survivors can face in coming to terms with the loss of communication and in adapting to life with a communication difficulty. Significant need for longer-term support was identified. Many of the participants who conveyed needs in relation to longer-term care were a number of years post-stroke which suggests that needs may persist over a significant period of time in the absence of resolution.

Our findings suggest that the biomedical model of illness is inadequate in understanding the full impact of communication disorders<sup>134</sup>. Traditional speech and language therapy approaches are based upon this model; typically focusing upon treating the specific impairment the patient is experiencing<sup>135 136</sup>. However, this synthesis of qualitative research demonstrates that the impact communication difficulties goes beyond symptoms of the medical impairment; influencing social relationships, mood and activities of daily living. The World Health Organisations International Classification of Functioning, Disability and Health (WHO ICF)<sup>137</sup> recognises the complex interplay of biological, psychological and social influences which may influence health. Findings from the current review support this model and suggest that wider psychosocial factors should be considered in the rehabilitation of post-stroke communication difficulties<sup>115</sup>.

Review findings also highlight the complex journey people with communication difficulties go through in adjusting and adapting to post-stroke life. Some were able to come to terms with their communication difficulties, take control and rebuild their lives. Others struggled to adapt and were unable to overcome the loss of previously valued activities and roles. These findings are consistent with established theories of chronic illness such as the chronic illness trajectory proposed by Corbin and



1  
2  
3 Strauss<sup>138 139</sup> and Bury's theory of biographical disruption<sup>140</sup> which explain how  
4 patients and families cope in different ways with their illness journey and the  
5 associated disruption to their lives. It is important to consider whether illness  
6 trajectories can be shaped so that stroke survivors with communication difficulties  
7 who struggle to adapt are better supported to manage their condition.  
8  
9  
10

11  
12  
13  
14 "Self-management" interventions are designed to support patients to cope with the  
15 physical and psychosocial consequences of living with a long-term condition<sup>141 142</sup>.  
16 There is evidence to support the use of self-management interventions in a range of  
17 chronic conditions<sup>143-146</sup> and there is a substantial policy drive towards taking this  
18 approach in stroke care<sup>2 8</sup>. However, the evidence to support the efficacy of self-  
19 management approaches in stroke is mixed<sup>147 148</sup> and a recent systematic review  
20 demonstrated that stroke survivors with aphasia are often excluded from RCTs of  
21 self-management interventions<sup>148</sup>. A significant proportion of self-management  
22 interventions are based upon or adapted from the Chronic Disease Self-  
23 Management programme<sup>145</sup>; a group-based patient education programme which has  
24 been assumed to be applicable across a range of chronic diseases. However,  
25 chronic diseases such as arthritis, diabetes and asthma may follow different  
26 trajectories to stroke<sup>139</sup>. Stroke is sudden and life-threatening at onset and causes  
27 striking and immediate disruption to patients' lives, in contrast to the more subtle  
28 onset and course of other chronic diseases. This suggests that self-management  
29 interventions may need to be designed specifically to meet the needs of stroke  
30 survivors (including those with communication difficulties) as opposed to being  
31 adapted from existing 'one size fits all' approaches<sup>149</sup>.  
32  
33  
34  
35  
36  
37  
38  
39  
40  
41  
42  
43  
44  
45  
46  
47

48 Existing self-management interventions have been criticised for their lack of user  
49 involvement and for being policy driven 'top-down' approaches as opposed to being  
50 driven by the needs and priorities of stakeholders<sup>150-152</sup>. Although there is significant  
51 overlap with the experiences of the general stroke survivor population<sup>24 39 43</sup>; findings  
52 from the current review highlight how post-stroke communication difficulties present  
53 a unique barrier, for example, to participation in meaningful activities or maintenance  
54 of social networks. Although self-management may be a useful concept, the findings  
55  
56  
57  
58  
59  
60



1  
2  
3 of the current review suggest that self-management interventions must be  
4 specifically designed to ensure they meet the needs of stroke survivors with  
5 communication difficulties and support them manage the psychosocial  
6 consequences of the communication difficulty itself.  
7  
8  
9

### 10 11 12 13 **Limitations of the review**

14  
15 Two areas of limitation can be identified in this review. Firstly, the quality of the  
16 synthesis is inherently limited by the quality and reporting of the original studies<sup>31 153</sup>.  
17 The results of the quality assessment highlighted the lack of reflexivity in the  
18 included studies. Reflexivity is the researcher's critical reflection upon how their own  
19 position within the research may have influenced the conduct or findings of the study  
20  
21  
22  
23  
24  
25  
26  
27  
28  
29  
30  
31  
32  
33  
34  
35  
36  
37  
38  
39  
40  
41  
42  
43  
44  
45  
46  
47  
48  
49  
50  
51  
52  
53  
54  
55  
56  
57  
58  
59  
60  
154 155. The lack of reflexivity means it is difficult to evaluate levels of researcher bias  
in study findings. In the majority of studies, data were collected by researchers who  
were also qualified speech and language therapists. This may have had some  
influence on the line of questioning or participant's responses or the analysis or  
presentation of results. A second limitation is the difficulty assessing publication bias.  
It is possible there is a bias towards publishing studies highlighting difficulties post-  
stroke as opposed to those highlighting more positive experiences. The current  
review identified significant need and this may be a result of biases in publication. It  
is difficult to quantify the impact of potential publication bias, however, it is important  
to note that studies were identified in the current synthesis which looked at patients  
who perceived themselves to be living successfully with aphasia and the factors  
influencing this<sup>51 52 61-63</sup>. These studies were of high quality and made a significant  
contribution to the synthesis of information.

### 51 52 53 54 55 56 57 58 59 60 **Implications for future research**

Future research should explore the possible components of a longer-term care  
intervention for stroke survivors with communication difficulties and the feasibility of  
self-management as an approach. Few studies explored need within the first year  
post-stroke and further information about how survivors with post-stroke  
communication difficulties manage their condition following hospital discharge is

1  
2  
3 required to further understand adaptation and adjustment during this time period and  
4 inform subsequent care strategies.  
5  
6  
7  
8

## 9 **Conclusions**

10  
11  
12 Our synthesis highlights the significant and continuing need for longer-term support  
13 experienced by stroke survivors with communication difficulties. Rehabilitation  
14 services designed around impairment based models of speech therapy may fail to  
15 address the psychosocial consequences of post-stroke communication difficulties  
16 and enable stroke survivors to successfully manage these difficulties within this  
17 context<sup>156</sup>. Self-management interventions may be useful to facilitate the process of  
18 adaptation and adjustment, however, a critical examination of self-management  
19 approaches and their suitability for stroke survivors with communication difficulties is  
20 needed to ensure that such interventions meet the needs of this population.  
21  
22  
23  
24  
25  
26  
27  
28  
29  
30  
31  
32  
33  
34  
35  
36  
37  
38  
39  
40  
41  
42  
43  
44  
45  
46  
47  
48  
49  
50  
51  
52  
53  
54  
55  
56  
57  
58  
59  
60

## Acknowledgements

With thanks to Jessica Hall and Farhat Mahmood for help with citation screening and double data extraction. Thanks also to Diedre Andre for help designing the search strategy and Anne Forster for reviewing the final version of the manuscript.

## Funding

This review was undertaken by the first author as part of a PhD project funded by the David and Anne Marie Marsden scholarship for stroke rehabilitation (University of Leeds).

## Statement of competing interests

None declared.

## Data sharing statement

No additional data are available.

## Contributor statement

FW contributed to the design of the study, acquired the data, analysed the data and drafted the manuscript. DC contributed to the design of the study and reviewed the manuscript for intellectual content.

## REFERENCES:

1. Feigin VL, Forouzanfar MH, Krishnamurthi R, et al. Global and regional burden of stroke during 1990–2010: findings from the Global Burden of Disease Study 2010. *The Lancet* 2014;**383**(9913):245-55.
2. Department of Health. National Stroke Strategy. 2007. [clahrc-gm.nihr.ac.uk/cms/wp.../DoH-National-Stroke-Strategy-2007.pdf](http://clahrc-gm.nihr.ac.uk/cms/wp.../DoH-National-Stroke-Strategy-2007.pdf) (accessed 17th July 2015).
3. McKeivitt C, Fudge N, Redfern J, et al. Self-reported long-term needs after stroke. *Stroke* 2011;**42**(5):1398-403.
4. Copley CS, Fisher RJ, Chouliara N, et al. A qualitative study exploring patients' and carers' experiences of Early Supported Discharge services after stroke. *Clin Rehabil* 2013;**27**(8):750-7.
5. Ellis-Hill C, Robison J, Wiles R, et al. Going home to get on with life: Patients and carers experiences of being discharged from hospital following a stroke. *Disability and Rehabilitation* 2009;**31**(2):61-72.
6. O'Connell B, Hanna B, Penney W, et al. Recovery after stroke: a qualitative perspective. *Journal of quality in clinical practice* 2001;**21**(4):120-5.
7. NICE. Stroke rehabilitation: Long-term rehabilitation after stroke. 2013. <https://www.nice.org.uk/guidance/cg162> (accessed 16th July 2015).
8. Intercollegiate Stroke Working Party. *National clinical guideline for stroke, 5th edition*. London: Royal College of Physicians, 2016.
9. Forster A, Dickerson J, Young J, et al. A cluster randomised controlled trial and economic evaluation of a structured training programme for caregivers of inpatients after stroke: the TRACS trial. *Health Technology Assessment (Winchester, England)* 2013;**17**(46):1-216.
10. Forster A, Young J, Chapman K, et al. Cluster Randomized Controlled Trial Clinical and Cost-Effectiveness of a System of Longer-Term Stroke Care. *Stroke* 2015;**46**(8):2212-19.
11. Forster A, Young J, Green J, et al. Structured re-assessment system at 6 months after a disabling stroke: a randomised controlled trial with resource use and cost study. *Age and ageing* 2009:afp095.
12. Arboix A, Martivilalta JL, Garcia JH. Clinical-Study of 227 Patients with Lacunar Infarcts. *Stroke* 1990;**21**(6):842-47.
13. Donkervoort M, Dekker J, van den Ende E, et al. Prevalence of apraxia among patients with a first left hemisphere stroke in rehabilitation centres and nursing homes. *Clinical Rehabilitation* 2000;**14**(2):130-36.
14. Engelter ST, Gostynski M, Papa S, et al. Epidemiology of aphasia attributable to first ischemic stroke - Incidence, severity, fluency, etiology, and thrombolysis. *Stroke* 2006;**37**(6):1379-84.
15. Melo TP, Bogousslavsky J, Vanmelle G, et al. Pure Motor Stroke - a Reappraisal. *Neurology* 1992;**42**(4):789-95.
16. Laska A, Hellblom A, Murray V, et al. Aphasia in acute stroke and relation to outcome. *Journal of internal medicine* 2001;**249**(5):413-22.
17. Hilari K. The impact of stroke: are people with aphasia different to those without? *Disability and rehabilitation* 2011;**33**(3):211-18.
18. Hilari K, Needle JJ, Harrison KL. What are the important factors in health-related quality of life for people with aphasia? A systematic review. *Archives of physical medicine and rehabilitation* 2012;**93**(1):S86-S95. e4.
19. Cruice M, Worrall L, Hickson L. Quantifying aphasic people's social lives in the context of non - aphasic peers. *Aphasiology* 2006;**20**(12):1210-25.
20. MRC. Developing and evaluating complex interventions: new guidance. 2008. [www.mrc.ac.uk/documents/pdf/complex-interventions-guidance/](http://www.mrc.ac.uk/documents/pdf/complex-interventions-guidance/) (accessed 17th July 2015).

- 1
- 2
- 3 21. NICE. Behaviour change: the principles for effective interventions. 2007.
- 4 <https://www.nice.org.uk/guidance/ph6> (accessed 14th September 2015).
- 5 22. NIHR. Patient and public involvement in health and social care research: A handbook for
- 6 researchers. 2014. [www.nihr.ac.uk/funding/.../RDS-PPI-Handbook-2014-v8-FINAL.pdf](http://www.nihr.ac.uk/funding/.../RDS-PPI-Handbook-2014-v8-FINAL.pdf)
- 7 (accessed 21st September 2015).
- 8 23. Salter K, Hellings C, Foley N, et al. The experience of living with stroke: a qualitative meta-
- 9 synthesis. *Journal of Rehabilitation Medicine* 2008;**40**(8):595-602.
- 10 24. Satink T, Cup EH, Iloft I, et al. Patients' views on the impact of stroke on their roles and self: a
- 11 thematic synthesis of qualitative studies. *Archives of physical medicine and rehabilitation*
- 12 2013;**94**(6):1171-83.
- 13 25. Walsh ME, Galvin R, Loughnane C, et al. Factors associated with community reintegration in the
- 14 first year after stroke: a qualitative meta-synthesis. *Disability and rehabilitation*
- 15 2015;**37**(18):1599-608.
- 16 26. Dalemans R, Wade DT, van den Heuvel WJA, et al. Facilitating the participation of people with
- 17 aphasia in research: a description of strategies. *Clinical Rehabilitation* 2009;**23**(10):948-59.
- 18 27. Luck AM, Rose ML. Interviewing people with aphasia: Insights into method adjustments from a
- 19 pilot study. *Aphasiology* 2007;**21**(2):208-24.
- 20 28. Simmons-Mackie N, Kagan A. Communication strategies used by 'good' versus 'poor' speaking
- 21 partners of individuals with aphasia. *Aphasiology* 1999;**13**(9-11):807-20.
- 22 29. Simmons-Mackie N, Lynch KE. Qualitative research in aphasia: A review of the literature.
- 23 *Aphasiology* 2013;**27**(11):1281-301.
- 24 30. Britten N, Campbell R, Pope C, et al. Using meta ethnography to synthesise qualitative research:
- 25 a worked example. *Journal of health services research & policy* 2002;**7**(4):209-15.
- 26 31. Campbell R, Pound P, Pope C, et al. Evaluating meta-ethnography: a synthesis of qualitative
- 27 research on lay experiences of diabetes and diabetes care. *Social science & medicine*
- 28 2003;**56**(4):671-84.
- 29 32. Thomas J, Harden A. Methods for the thematic synthesis of qualitative research in systematic
- 30 reviews. *BMC medical research methodology* 2008;**8**(1):45.
- 31 33. Evans D. Database searches for qualitative research. *Journal of the Medical Library Association* :
- 32 *JMLA* 2002;**90**(3):290-3.
- 33 34. Centre for reviews and dissemination. Systematic reviews: CRD's guidance for undertaking
- 34 reviews in health care. 2009.
- 35 <http://www.york.ac.uk/crd/SysRev/!SSL!/WebHelp/SysRev3.htm> (accessed 17th July 2015).
- 36 35. Flemming K, Briggs M. Electronic searching to locate qualitative research: evaluation of three
- 37 strategies. *Journal of advanced nursing* 2007;**57**(1):95-100.
- 38 36. Shaw RL, Booth A, Sutton AJ, et al. Finding qualitative research: an evaluation of search strategies.
- 39 *BMC medical research methodology* 2004;**4**(1):5.
- 40 37. Gough D, Oliver S, Thomas J. *An introduction to systematic reviews*. London: Sage, 2012.
- 41 38. Wong SS, Wilczynski NL, Haynes RB, et al. Developing optimal search strategies for detecting
- 42 clinically relevant qualitative studies in MEDLINE. *Stud Health Technol Inform* 2004;**107**(Pt
- 43 1):311-6.
- 44 39. McKeivitt C, Redfern J, Mold F, et al. Qualitative studies of stroke: a systematic review. *Stroke*
- 45 2004;**35**(6):1499-505.
- 46 40. Mays N, Pope C. Assessing quality in qualitative research. *British medical journal*
- 47 2000;**320**(7226):50.
- 48 41. NICE. Methods for the development of NICE public health guidance (third edition). 2012.
- 49 [https://www.nice.org.uk/process/pmg4/chapter/15-appendix-h-quality-appraisal-checklist-](https://www.nice.org.uk/process/pmg4/chapter/15-appendix-h-quality-appraisal-checklist-qualitative-studies)
- 50 [qualitative-studies](https://www.nice.org.uk/process/pmg4/chapter/15-appendix-h-quality-appraisal-checklist-qualitative-studies) (accessed 12th July 2016).
- 51 42. Higgins JP, Green S. *Cochrane handbook for systematic reviews of interventions* Version 5.1.0.
- 52 2011. [www.cochrane-handbook.org](http://www.cochrane-handbook.org) (accessed 17th July 2015).
- 53
- 54
- 55
- 56
- 57
- 58
- 59
- 60

43. Walsh D, Downe S. Meta - synthesis method for qualitative research: a literature review. *Journal of advanced nursing* 2005;**50**(2):204-11.
44. Barnett-Page E, Thomas J. Methods for the synthesis of qualitative research: a critical review. *BMC medical research methodology* 2009;**9**(1):59.
45. Eaves YD. A synthesis technique for grounded theory data analysis. *Journal of advanced nursing* 2001;**35**(5):654-63.
46. Morton R, Tong A, Howard K, et al. The views of patients and carers in treatment decision making for chronic kidney disease: systematic review and thematic synthesis of qualitative studies. *BmJ* 2010;**340**:c112.
47. Baylor C, Burns M, Eadie T, et al. A qualitative study of interference with communicative participation across communication disorders in adults. *American Journal of Speech-Language Pathology* 2011;**20**(4):269-87.
48. Brady MC, Clark AM, Dickson S, et al. Dysarthria following stroke: the patient's perspective on management and rehabilitation. *Clinical Rehabilitation* 2011;**25**(10):935-52.
49. Brady MC, Clark AM, Dickson S, et al. The impact of stroke-related dysarthria on social participation and implications for rehabilitation. *Disability & Rehabilitation* 2011;**33**(3):178-86.
50. Brown K, Davidson B, Worrall LE, et al. "Making a good time": the role of friendship in living successfully with aphasia. *International Journal of Speechlanguage Pathology* 2013;**15**(2):165-75.
51. Brown K, Worrall L, Davidson B, et al. Snapshots of success: An insider perspective on living successfully with aphasia. *Aphasiology* 2010;**24**(10):1267-95.
52. Brown K, Worrall L, Davidson B, et al. Living successfully with aphasia: family members share their views. *Topics in Stroke Rehabilitation* 2011;**18**(5):536-48.
53. Cruice M, Hill R, Worrall L, et al. Conceptualising quality of life for older people with aphasia. *Aphasiology* 2010;**24**(3):327-47.
54. Cyr R. Resilience in aphasia: Perspectives of stroke survivors and their families [M.Sc.]. University of Alberta (Canada), 2010.
55. Dalemans R, de WL, Wade D, et al. Social participation through the eyes of people with aphasia. *International Journal of Language & Communication Disorders* 2010;**45**(5):537-50.
56. Davidson B, Howe T, Worrall L, et al. Social participation for older people with aphasia: the impact of communication disability on friendships. *Topics in Stroke Rehabilitation* 2008;**15**(4):325-40.
57. Davidson B, Worrall L, Hickson L. Exploring the interactional dimension of social communication: A collective case study of older people with aphasia. *Aphasiology* 2008;**22**(3):235-57.
58. Dickson S, Barbour R, Brady M, et al. Patients' Experiences of Disruptions Associated with Post-Stroke Dysarthria. *International Journal of Language & Communication Disorders* 2008;**43**(2):135-53.
59. Dietz A, Thiessen A, Griffith J, et al. The renegotiation of social roles in chronic aphasia: Finding a voice through AAC. *Aphasiology* 2013;**27**(3):309-25.
60. Fotiadou D, Northcott S, Chatzidaki A, et al. Aphasia blog talk: How does stroke and aphasia affect a person's social relationships? *Aphasiology* 2014;**28**(11):1281-300.
61. Grohn B, Worrall L, Simmons-Mackie N, et al. Living successfully with aphasia during the first year post-stroke: A longitudinal qualitative study. *Aphasiology* 2014;**28**(12):1405-25.
62. Grohn B, Worrall LE, Simmons-Mackie N, et al. The first 3-months post-stroke: what facilitates successfully living with aphasia?. *International Journal of Speechlanguage Pathology* 2012;**14**(4):390-400.
63. Hinckley JJ. Finding Messages in Bottles: Living Successfully with Stroke and Aphasia. *Topics in Stroke Rehabilitation* 2006;**13**(1):25-36.
64. Howe TJ, Worrall LE, Hickson LM. Observing people with aphasia: Environmental factors that influence their community participation. *Aphasiology* 2008;**22**(6):618-43.



- 1
- 2
- 3 65. Howe TJ, Worrall LE, Hickson LMH. Interviews with people with aphasia: environmental factors
- 4 that influence their community participation. *Aphasiology* 2008;**22**(10):1092-120.
- 5 66. Johansson M, Carlsson M, Sonnander K. Communication difficulties and the use of
- 6 communication strategies: From the perspective of individuals with aphasia. *International*
- 7 *Journal of Language & Communication Disorders* 2012;**47**(2):144-55.
- 8 67. Le DG, Brassard C, Larfeuil C, et al. Auditory comprehension problems in aphasia from the
- 9 perspective of aphasic persons and their families and friends. *Disability and Rehabilitation*
- 10 1996;**18**(11):550-8.
- 11 68. Le Dorze G, Brassard C. A description of the consequences of aphasia on aphasic persons and
- 12 their relatives and friends, based on the WHO model of chronic diseases. *Aphasiology*
- 13 1995;**9**(3):239-55.
- 14 69. Le Dorze G, Salois-Belleroise E, Alepins M, et al. A description of the personal and environmental
- 15 determinants of participation several years post-stroke according to the views of people
- 16 who have aphasia. *Aphasiology* 2014;**28**(4):421-39.
- 17 70. Matos MAC, Jesus LM, Cruice M. Consequences of stroke and aphasia according to the ICF
- 18 domains: Views of Portuguese people with aphasia, family members and professionals.
- 19 *Aphasiology* 2014;**28**(7):771-96.
- 20 71. Nätterlund BS. A new life with aphasia: everyday activities and social support. *Scandinavian*
- 21 *Journal of Occupational Therapy* 2010;**17**(2):117-29.
- 22 72. Niemi T, Johansson U. The lived experience of engaging in everyday occupations in persons with
- 23 mild to moderate aphasia. *Disability & Rehabilitation* 2013;**35**(21):1828-34.
- 24 73. Parr S. Psychosocial aspects of aphasia: whose perspectives?. *Folia Phoniatica et Logopedica*
- 25 2001;**53**(5):266-88.
- 26 74. Parr S. Living with severe aphasia: Tracking social exclusion. *Aphasiology* 2007;**21**(1):98-123.
- 27 75. Pound C. An exploration of the friendship experiences of working-age adults with aphasia [Ph.D.].
- 28 Brunel University (United Kingdom), 2013.
- 29 76. Pringle J, Hendry C, McLafferty E, et al. Stroke survivors with aphasia: personal experiences of
- 30 coming home. *British Journal of Community Nursing* 2010;**15**(5):241-3, 45-7.
- 31 77. Runne C. Self-Efficacy in People with Speech or Language Disorders: A Qualitative Study
- 32 [Master's]. University of Washington, 2012.
- 33 78. Worrall L, Sherratt S, Rogers P, et al. What people with aphasia want: Their goals according to
- 34 the ICF. *Aphasiology* 2011;**25**(3):309-22.
- 35 79. Ashton C, Aziz NA, Barwood C, et al. Communicatively accessible public transport for people with
- 36 aphasia: A pilot study. *Aphasiology* 2008;**22**(3):305-20.
- 37 80. Barrow R. Listening to the voice of living life with aphasia: Anne's story. *International Journal of*
- 38 *Language & Communication Disorders* 2008;**43 Suppl 1**:30-46.
- 39 81. Blonski DC, Covert M, Gauthier R, et al. Barriers to and Facilitators of Access and Participation in
- 40 Community-Based Exercise Programmes from the Perspective of Adults with Post-stroke
- 41 Aphasia. *Physiotherapy Canada* 2014;**66**(4):367-75.
- 42 82. Ferguson A, Worrall L, Davidson B, et al. Describing the experience of aphasia rehabilitation
- 43 through metaphor. *Aphasiology* 2010;**24**(6-8):685-96.
- 44 83. Garcia LJ, Barrette J, Laroche C. Perceptions of the obstacles to work reintegration for persons
- 45 with aphasia. *Aphasiology* 2000;**14**(3):269-90.
- 46 84. Greig C, Harper R, Hirst T, et al. Barriers and facilitators to mobile phone use for people with
- 47 aphasia. *Topics in Stroke Rehabilitation* 2008;**15**(4):307-24.
- 48 85. Howe T, Davidson B, Worrall L, et al. 'You needed to rehab ... families as well': family members'
- 49 own goals for aphasia rehabilitation. *International Journal of Language & Communication*
- 50 *Disorders* 2012;**47**(5):511-21.
- 51 86. Jones F, Mandy A, Partridge C. Reasons for recovery after stroke: a perspective based on
- 52 personal experience. *Disability & Rehabilitation* 2008;**30**(7):507-16.
- 53
- 54
- 55
- 56
- 57
- 58
- 59
- 60

- 1  
2  
3 87. Legg L, Stott D, Ellis G, et al. Volunteer Stroke Service (VSS) groups for patients with  
4 communication difficulties after stroke: a qualitative analysis of the value of groups to their  
5 users. *Clinical Rehabilitation* 2007;**21**(9):794-804.
- 6 88. Mackenzie C, Kelly S, Paton G, et al. The Living with Dysarthria group for post-stroke dysarthria:  
7 the participant voice. *International Journal of Language & Communication Disorders*  
8 2013;**48**(4):402-20.
- 9 89. Mitchell K, Skirton H, Monrouxe L. Amelioration, regeneration, acquiescent and discordant: An  
10 exploration of narrative types and metaphor use in people with aphasia. *Disability & Society*  
11 2011;**26**(3):321-35.
- 12 90. Morris K, Ferguson A, Worrall L. A qualitative study of legal and social justice needs for people  
13 with aphasia. *International Journal of Speech-Language Pathology* 2014;**16**(6):541-51.
- 14 91. Mumby K, Whitworth A. Evaluating the effectiveness of intervention in long-term aphasia post-  
15 stroke: the experience from CHANT (Communication Hub for Aphasia in North Tyneside).  
16 *International Journal of Language & Communication Disorders* 2012;**47**(4):398-412.
- 17 92. Mumby K, Whitworth A. Adjustment processes in chronic aphasia after stroke: Exploring multiple  
18 perspectives in the context of a community-based intervention. *Aphasiology* 2013;**27**(4):462-  
19 89.
- 20 93. Northcott S, Hilari K. Why do people lose their friends after a stroke? *International Journal of*  
21 *Language & Communication Disorders* 2011;**46**(5):524-34.
- 22 94. Nystrom M. Aphasia--An existential loneliness: A study on the loss of the world of symbols.  
23 *International Journal of Qualitative Studies on Health and Well-being* 2006;**1**(1):38-49.
- 24 95. Nystrom M. Professional aphasia care trusting the patient's competence while facing existential  
25 issues. *Journal of Clinical Nursing* 2009;**18**(17):2503-10.
- 26 96. Parr S. Coping with aphasia: Conversations with 20 aphasic people. *Aphasiology* 1994;**8**(5):457-66.
- 27 97. Parr S. Everyday reading and writing in aphasia: Role change and the influence of pre-morbid  
28 literacy practice. *Aphasiology* 1995;**9**(3):223-38.
- 29 98. Pearl G, Sage K, Young A. Involvement in volunteering: an exploration of the personal experience  
30 of people with aphasia. *Disability & Rehabilitation* 2011;**33**(19-20):1805-21.
- 31 99. Tregea S, Brown K. What makes a successful peer-led aphasia support group? *Aphasiology*  
32 2013;**27**(5):581-98.
- 33 100. Boles L. Success stories in aphasia. *Topics in Stroke Rehabilitation* 2006;**13**(1):37-43.
- 34 101. Carriero MR, Faglia L, Vignolo LA. Resumption of gainful employment in aphasics: preliminary  
35 findings. *Cortex* 1987;**23**(4):667-72.
- 36 102. Cruice M, Worrall L, Hickson L. Perspectives of quality of life by people with aphasia and their  
37 family: suggestions for successful living. *Topics in Stroke Rehabilitation* 2006;**13**(1):14-24.
- 38 103. Davidson B, Worrall L, Hickson L. Social communication in older age: lessons from people with  
39 aphasia. *Topics in Stroke Rehabilitation* 2006;**13**(1):1-13.
- 40 104. Horton S, Mudd D, Lane J. Is anyone speaking my language? *International Journal of Language*  
41 *and Communication Disorders* 1998;**33**(SUPPL.):126-31.
- 42 105. Lemieux L, Cohen-Schneider R, Holzapfel S. Aphasia and sexuality. *Sexuality and Disability*  
43 2001;**19**(4):253-66.
- 44 106. Parr S, Pound C, Hewitt A. Communication Access to Health and Social Services. *Topics in*  
45 *Language Disorders* 2006;**26**(3):189-98.
- 46 107. Simmons-Mackie N, Damico J. Intervention outcomes: a clinical application of qualitative  
47 methods. *Topics in Language Disorder* 2001;**22**(1):21-36.
- 48 108. Skelly M. Rethinking stroke: Aphasic patients talk back. *The American Journal of Nursing*  
49 1975;**75**(7):1140-42.
- 50 109. Wallace G. Profile of life participation after stroke and aphasia. *Topics in Stroke Rehabilitation*  
51 2010;**17**(6):432-50.
- 52 110. Zemva N. Aphasic patients and their families: Wishes and limits. *Aphasiology* 1999;**13**(3):219-24.
- 53  
54  
55  
56  
57  
58  
59  
60



111. Marshall RC. An introduction to supported conversation for adults with aphasia: Perspectives, problems and possibilities. *Aphasiology* 1998;**12**(9):811-64.
112. Parr S, Duchan J, Pound C, et al. Aphasia inside out: reflections on communication disability. *Disability and society* 2004;**19**(3):276-78.
113. Rolnick M, Hoops HR. Aphasia as seen by the aphasic. *Journal of Speech & Hearing Disorders* 1969;**34**(1):48-53.
114. Schnitzer ML, Goodglass H. The pragmatic basis of aphasia. *Language* 1991;**67**(2):348.
115. Worrall L, Brown K, Cruice M, et al. The evidence for a life-coaching approach to aphasia. *Aphasiology* 2010;**24**(4):497-514.
116. Worrall L, Rose T, Howe T, et al. Developing an evidence-base for accessibility for people with aphasia. *Aphasiology* 2007;**21**(1):124-36.
117. Fretterd CR. Living successfully with aphasia: What it means for speech language pathologists and their clients [M.S.]. The William Paterson University of New Jersey, 2014.
118. Kardosh BM. The Nature of Recovery in Aphasia from Two Perspectives: A Phenomenological Study [Ph.D.]. University of Louisiana at Lafayette, 2011.
119. Klippi A. Qualitative research: analysing aphasic conversations. *Journal of Neurolinguistics* 2000;**13**(4):305-07.
120. Yoshimura T, Maeshima S, Aiko A, et al. The lifestyles of the individuals with severe aphasia: Focusing on the travel experiences. *Stroke* 2004;**35**(6):E320-E20.
121. Ellis C, Focht KL, Grubaugh AL. Perceptions of stroke recovery: an exclusion of communication and cognition. *Neurorehabilitation* 2013;**33**(2):233-9.
122. Lanza M, Prunier S. Breaking through barriers to recovery from a stroke: both sides of the experience. *American Journal of Medical Quality* 2002;**17**(6):249-54.
123. Walshe M, Miller N. Living with acquired dysarthria: the speaker's perspective. *Disability & Rehabilitation* 2011;**33**(3):195-203.
124. Anglade C, Croteau C, Le Dorze G. Understanding the experience of people with communication disability after stroke outside their home in transaction situations. *Stroke* 2013;**44** (12):e214.
125. Foster AM, Worrall LE, Rose ML, et al. Acute post-stroke aphasia management: Multiple perspectives on a single patient journey. *Stroke* 2013;**44** (12):e216.
126. Van Wijck F, Moore H, Morris J, et al. What matters to people after stroke? Using an innovative communication framework to interview people with aphasia about stroke rehabilitation outcomes. *Cerebrovascular Diseases* 2013;**35**:211.
127. Hinckley J. Finding messages in bottles: living successfully with stroke and aphasia. *Topics in stroke rehabilitation* 2006;**13**(1):25.
128. Abraham C, Michie S. A taxonomy of behavior change techniques used in interventions. *Health psychology* 2008;**27**(3):379.
129. Simmons-Mackie N, Raymer A, Armstrong E, et al. Communication Partner Training in Aphasia: A Systematic Review. *Archives of Physical Medicine and Rehabilitation* 2010;**91**(12):1814-37.
130. Reeves D, Blickem C, Vassilev I, et al. The contribution of social networks to the health and self-management of patients with long-term conditions: a longitudinal study. *PloS one* 2014;**9**(6):e98340.
131. Cameron JI, Gignac MAM. "Timing It Right": A conceptual framework for addressing the support needs of family caregivers to stroke survivors from the hospital to the home. *Patient Education and Counseling* 2008;**70**(3):305-14.
132. Prochaska JO, Velicer WF. The transtheoretical model of health behavior change. *American journal of health promotion* 1997;**12**(1):38-48.
133. Bandura A. Self-efficacy: toward a unifying theory of behavioral change. *Psychological review* 1977;**84**(2):191.
134. Wade DT, Halligan P. Do biomedical models of illness make for good healthcare systems? *British Medical Journal* 2004;**329**(7479):1398-401.

- 1  
2  
3 135. Brady MC, Kelly H, Godwin J, et al. Speech and language therapy for aphasia following stroke.  
4 Cochrane Database of Systematic Reviews 2012;**5**:CD000425.  
5 136. Sellars C, Hughes T, Langhorne P. Speech and language therapy for dysarthria due to non-  
6 progressive brain damage. Cochrane Database Syst Rev 2005;**3**.  
7 137. World Health Organization. Towards a common language for Functioning, Disability and Health  
8 ICF. Geneva: World Health Organisation 2002.  
9 138. Corbin JM, Strauss A. A nursing model for chronic illness management based upon the  
10 trajectory framework. Scholarly inquiry for nursing practice 1991;**5**(3):155-74.  
11 139. Burton CR. Re - thinking stroke rehabilitation: The Corbin and Strauss chronic illness trajectory  
12 framework. Journal of Advanced Nursing 2000;**32**(3):595-602.  
13 140. Bury M. Chronic illness as biographical disruption. Sociology of health & illness 1982;**4**(2):167-  
14 82.  
15 141. Barlow J, Wright C, Sheasby J, et al. Self-management approaches for people with chronic  
16 conditions: a review. Patient Educ Couns 2002;**48**(2):177-87.  
17 142. Lorig KR, Holman HR. Self-management education: history, definition, outcomes, and  
18 mechanisms. Annals of behavioral medicine 2003;**26**(1):1-7.  
19 143. Deakin T, McShane C, Cade JE, et al. Group based training for self-management strategies in  
20 people with type 2 diabetes mellitus - art. no. CD003417.pub2. Cochrane Database of  
21 Systematic Reviews 2005(2).  
22 144. Gibson PG, Powell H, Coughlan J, et al. Self-management education and regular practitioner  
23 review for adults with asthma. Cochrane Database Syst Rev 2002;**3**.  
24 145. Lorig KR, Ritter P, Stewart AL, et al. Chronic disease self-management program: 2-year health  
25 status and health care utilization outcomes. Medical care 2001;**39**(11):1217-23.  
26 146. Zwerink M, Brusse-Keizer M, van der Valk PD, et al. Self management for patients with chronic  
27 obstructive pulmonary disease. Cochrane Database Syst Rev 2014;**3**.  
28 147. Fryer CE, Luker JA, McDonnell MN, et al. Self management programmes for quality of life in  
29 people with stroke. The Cochrane Library 2016.  
30 148. Wray F, Clarke D, Forster A. Post-stroke self-management interventions: a systematic review of  
31 effectiveness and investigation of the inclusion of stroke survivors with aphasia. Disability  
32 and Rehabilitation 2017:1-15.  
33 149. Jones F, Riaz A, Norris M. Self-management after stroke: Time for some more questions?  
34 Disability and Rehabilitation 2013;**35**(3):257-64.  
35 150. Boger EJ, Demain S, Latter S. Self-management: a systematic review of outcome measures  
36 adopted in self-management interventions for stroke. Disability and rehabilitation  
37 2013;**35**(17):1415-28.  
38 151. Greenhalgh T. Patient and public involvement in chronic illness: beyond the expert patient. BMJ  
39 2009;**338**.  
40 152. Kendall E, Rogers A. Extinguishing the social?: state sponsored self - care policy and the Chronic  
41 Disease Self - management Programme. Disability & Society 2007;**22**(2):129-43.  
42 153. Dixon-Woods M, Shaw RL, Agarwal S, et al. The problem of appraising qualitative research.  
43 Quality and Safety in Health Care 2004;**13**(3):223-25.  
44 154. Berger R. Now I see it, now I don't: Researcher's position and reflexivity in qualitative research.  
45 Qualitative Research 2015;**15**(2):219-34.  
46 155. Jootun D, McGhee G, Marland GR. Reflexivity: promoting rigour in qualitative research. Nursing  
47 Standard 2009;**23**(23):42-46.  
48 156. Wade D. Rehabilitation – a new approach. Part four: a new paradigm, and its implications.  
49 Clinical Rehabilitation 2016;**30**(2):109-18.  
50  
51  
52  
53  
54  
55  
56  
57  
58  
59  
60

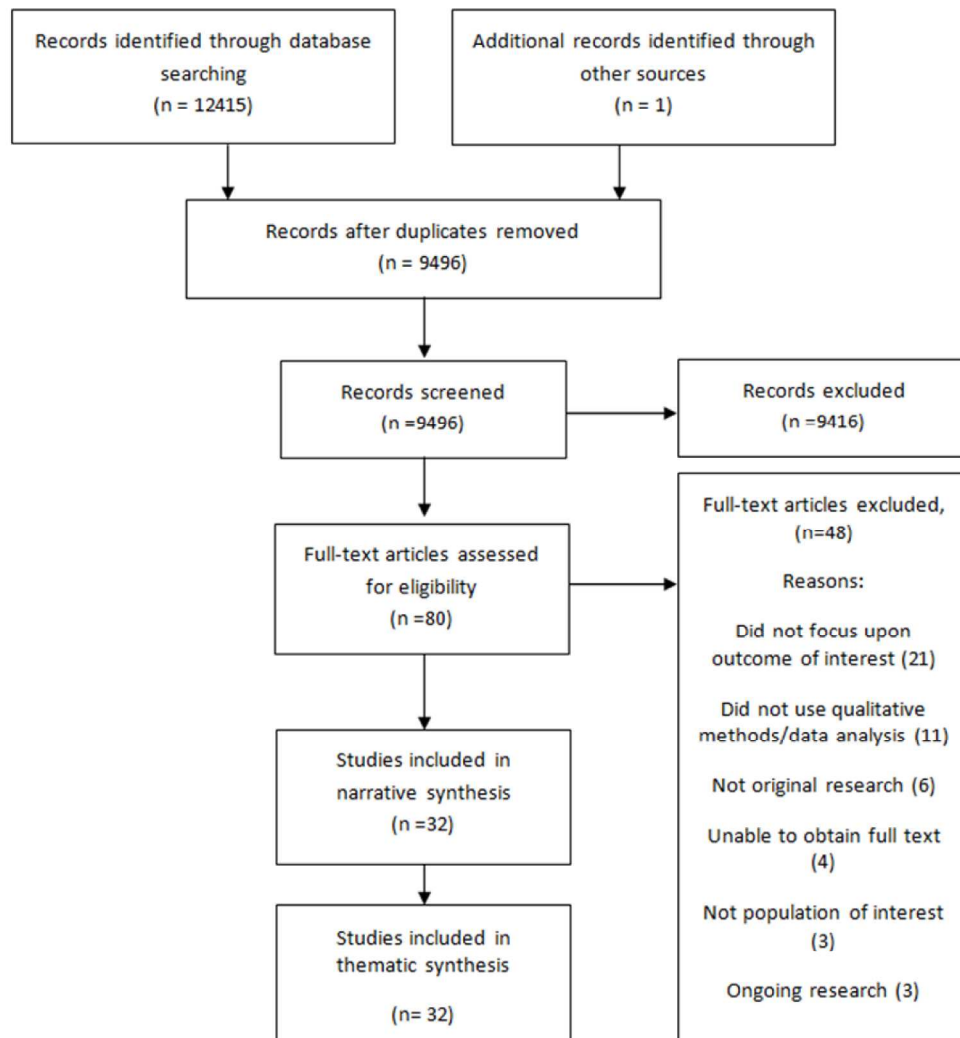

Figure 1: PRISMA flow diagram

279x293mm (300 x 300 DPI)

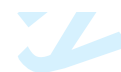

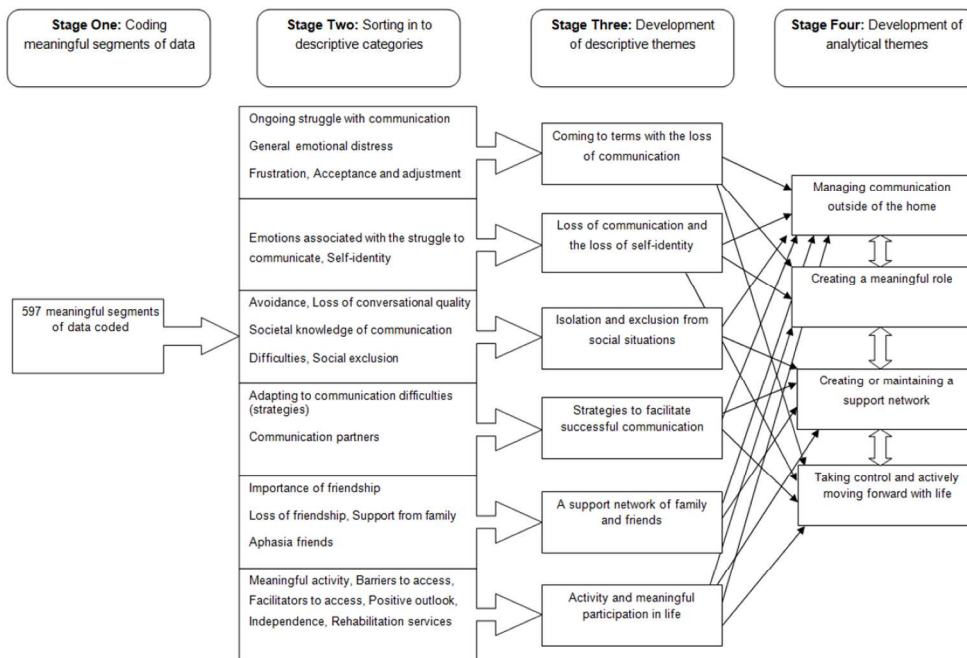

Figure 2: The development of descriptive and analytical themes

265x175mm (300 x 300 DPI)

view only

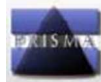

# PRISMA 2009 Checklist

1  
2  
3  
4  
5  
6  
7  
8  
9  
10  
11  
12  
13  
14  
15  
16  
17  
18  
19  
20  
21  
22  
23  
24  
25  
26  
27  
28  
29  
30  
31  
32  
33  
34  
35  
36  
37  
38  
39  
40  
41  
42  
43  
44  
45  
46  
47  
48  
49

| Section/topic                      | #  | Checklist item                                                                                                                                                                                                                                                                                              | Reported on page #                                        |
|------------------------------------|----|-------------------------------------------------------------------------------------------------------------------------------------------------------------------------------------------------------------------------------------------------------------------------------------------------------------|-----------------------------------------------------------|
| <b>TITLE</b>                       |    |                                                                                                                                                                                                                                                                                                             |                                                           |
| Title                              | 1  | Identify the report as a systematic review, meta-analysis, or both.                                                                                                                                                                                                                                         | 1                                                         |
| <b>ABSTRACT</b>                    |    |                                                                                                                                                                                                                                                                                                             |                                                           |
| Structured summary                 | 2  | Provide a structured summary including, as applicable: background; objectives; data sources; study eligibility criteria, participants, and interventions; study appraisal and synthesis methods; results; limitations; conclusions and implications of key findings; systematic review registration number. | 2                                                         |
| <b>INTRODUCTION</b>                |    |                                                                                                                                                                                                                                                                                                             |                                                           |
| Rationale                          | 3  | Describe the rationale for the review in the context of what is already known.                                                                                                                                                                                                                              | 4-5                                                       |
| Objectives                         | 4  | Provide an explicit statement of questions being addressed with reference to participants, interventions, comparisons, outcomes, and study design (PICOS).                                                                                                                                                  | 5                                                         |
| <b>METHODS</b>                     |    |                                                                                                                                                                                                                                                                                                             |                                                           |
| Protocol and registration          | 5  | Indicate if a review protocol exists, if and where it can be accessed (e.g., Web address), and, if available, provide registration information including registration number.                                                                                                                               | 6                                                         |
| Eligibility criteria               | 6  | Specify study characteristics (e.g., PICOS, length of follow-up) and report characteristics (e.g., years considered, language, publication status) used as criteria for eligibility, giving rationale.                                                                                                      | 6                                                         |
| Information sources                | 7  | Describe all information sources (e.g., databases with dates of coverage, contact with study authors to identify additional studies) in the search and date last searched.                                                                                                                                  | 7                                                         |
| Search                             | 8  | Present full electronic search strategy for at least one database, including any limits used, such that it could be repeated.                                                                                                                                                                               | See online supplementary information                      |
| Study selection                    | 9  | State the process for selecting studies (i.e., screening, eligibility, included in systematic review, and, if applicable, included in the meta-analysis).                                                                                                                                                   | 7                                                         |
| Data collection process            | 10 | Describe method of data extraction from reports (e.g., piloted forms, independently, in duplicate) and any processes for obtaining and confirming data from investigators.                                                                                                                                  | 7                                                         |
| Data items                         | 11 | List and define all variables for which data were sought (e.g., PICOS, funding sources) and any assumptions and simplifications made.                                                                                                                                                                       | 7                                                         |
| Risk of bias in individual studies | 12 | Describe methods used for assessing risk of bias of individual studies (including specification of whether this was done at the study or outcome level), and how this information is to be used in any data synthesis.                                                                                      | N/A but included equivalent section on quality assessment |

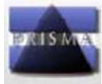

# PRISMA 2009 Checklist

|                      |    |                                                                                                                                                           |                        |
|----------------------|----|-----------------------------------------------------------------------------------------------------------------------------------------------------------|------------------------|
|                      |    |                                                                                                                                                           | p.8                    |
| Summary measures     | 13 | State the principal summary measures (e.g., risk ratio, difference in means).                                                                             | N/A qualitative review |
| Synthesis of results | 14 | Describe the methods of handling data and combining results of studies, if done, including measures of consistency (e.g., $I^2$ ) for each meta-analysis. | 8/9                    |

Page 1 of 2

| Section/topic                 | #  | Checklist item                                                                                                                                                                                           | Reported on page #     |
|-------------------------------|----|----------------------------------------------------------------------------------------------------------------------------------------------------------------------------------------------------------|------------------------|
| Risk of bias across studies   | 15 | Specify any assessment of risk of bias that may affect the cumulative evidence (e.g., publication bias, selective reporting within studies).                                                             | N/A qualitative review |
| Additional analyses           | 16 | Describe methods of additional analyses (e.g., sensitivity or subgroup analyses, meta-regression), if done, indicating which were pre-specified.                                                         | N/A qualitative review |
| <b>RESULTS</b>                |    |                                                                                                                                                                                                          |                        |
| Study selection               | 17 | Give numbers of studies screened, assessed for eligibility, and included in the review, with reasons for exclusions at each stage, ideally with a flow diagram.                                          | 10                     |
| Study characteristics         | 18 | For each study, present characteristics for which data were extracted (e.g., study size, PICOS, follow-up period) and provide the citations.                                                             | 10-17                  |
| Risk of bias within studies   | 19 | Present data on risk of bias of each study and, if available, any outcome level assessment (see item 12).                                                                                                | N/A qualitative review |
| Results of individual studies | 20 | For all outcomes considered (benefits or harms), present, for each study: (a) simple summary data for each intervention group (b) effect estimates and confidence intervals, ideally with a forest plot. | N/A qualitative review |
| Synthesis of results          | 21 | Present results of each meta-analysis done, including confidence intervals and measures of consistency.                                                                                                  | N/A qualitative review |
| Risk of bias across studies   | 22 | Present results of any assessment of risk of bias across studies (see Item 15).                                                                                                                          | N/A qualitative review |
| Additional analysis           | 23 | Give results of additional analyses, if done (e.g., sensitivity or subgroup analyses, meta-regression [see Item 16]).                                                                                    | N/A qualitative review |

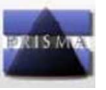

# PRISMA 2009 Checklist

1  
2  
3  
4  
5  
6  
7  
8  
9  
10  
11  
12  
13  
14  
15  
16  
17  
18  
19  
20  
21  
22  
23  
24  
25  
26  
27  
28  
29  
30  
31  
32  
33  
34  
35  
36  
37  
38  
39  
40  
41  
42  
43  
44  
45  
46  
47  
48  
49

|                     |    |                                                                                                                                                                                      |    |
|---------------------|----|--------------------------------------------------------------------------------------------------------------------------------------------------------------------------------------|----|
| <b>DISCUSSION</b>   |    |                                                                                                                                                                                      |    |
| Summary of evidence | 24 | Summarize the main findings including the strength of evidence for each main outcome; consider their relevance to key groups (e.g., healthcare providers, users, and policy makers). | 29 |
| Limitations         | 25 | Discuss limitations at study and outcome level (e.g., risk of bias), and at review-level (e.g., incomplete retrieval of identified research, reporting bias).                        | 31 |
| Conclusions         | 26 | Provide a general interpretation of the results in the context of other evidence, and implications for future research.                                                              | 32 |
| <b>FUNDING</b>      |    |                                                                                                                                                                                      |    |
| Funding             | 27 | Describe sources of funding for the systematic review and other support (e.g., supply of data); role of funders for the systematic review.                                           | 33 |

From: Moher D, Liberati A, Tetzlaff J, Altman DG, The PRISMA Group (2009). Preferred Reporting Items for Systematic Reviews and Meta-Analyses: The PRISMA Statement. PLoS Med 6(6): e1000097. doi:10.1371/journal.pmed1000097

For more information, visit: [www.prisma-statement.org](http://www.prisma-statement.org).

# BMJ Open

## Longer-term needs of stroke survivors with communication difficulties living in the community: A systematic review and thematic synthesis of qualitative studies.

|                                 |                                                                                                                                                             |
|---------------------------------|-------------------------------------------------------------------------------------------------------------------------------------------------------------|
| Journal:                        | <i>BMJ Open</i>                                                                                                                                             |
| Manuscript ID                   | bmjopen-2017-017944.R1                                                                                                                                      |
| Article Type:                   | Research                                                                                                                                                    |
| Date Submitted by the Author:   | 11-Jul-2017                                                                                                                                                 |
| Complete List of Authors:       | Wray, Faye; University of Leeds, Leeds Institute of Health Sciences<br>Clarke, David; University of Leeds, Academic Unit of Elderly Care and Rehabilitation |
| <b>Primary Subject Heading</b>: | Rehabilitation medicine                                                                                                                                     |
| Secondary Subject Heading:      | Qualitative research, Communication, Health services research                                                                                               |
| Keywords:                       | Systematic review, Stroke < NEUROLOGY, aphasia, dysarthria, apraxia of speech                                                                               |
|                                 |                                                                                                                                                             |

SCHOLARONE™  
Manuscripts



1  
2  
3 Longer-term needs of stroke survivors with communication difficulties  
4  
5  
6 living in the community: A systematic review and thematic synthesis of  
7  
8 qualitative studies.  
9  
10

11  
12  
13  
14 Faye Wray\*<sup>1</sup> and David Clarke<sup>1</sup>  
15  
16

17  
18  
19 Word count: 5556  
20  
21  
22  
23  
24  
25  
26  
27  
28  
29  
30

31 Keywords: Stroke, Aphasia, Dysarthria, Apraxia of Speech, Systematic Review  
32  
33  
34  
35  
36  
37

---

38  
39 **CONTACT DETAILS**  
40

- 41  
42 ○ Mrs Faye Wray (\*corresponding author)

43  
44 Email: [ps10fdp@leeds.ac.uk](mailto:ps10fdp@leeds.ac.uk) Tel: 01274 382818  
45

46 Address: Academic Unit of Elderly Care and Rehabilitation, Leeds Institute for Health Sciences,  
47 Bradford Institute for Health Research, Temple Bank House, Bradford Royal Infirmary, BD9 6RJ  
48  
49

- 50  
51 ○ Dr David Clarke

52  
53 Email: [d.j.clarke@leeds.ac.uk](mailto:d.j.clarke@leeds.ac.uk) Tel: 01274 383441  
54  
55

56 Address: Academic Unit of Elderly Care and Rehabilitation, Leeds Institute for Health Sciences,  
57 Bradford Institute for Health Research, Temple Bank House, Bradford Royal Infirmary, BD9 6RJ  
58  
59  
60

## ABSTRACT

**Objective:** To review and synthesise qualitative literature relating to the longer-term needs of community dwelling stroke survivors with communication difficulties including aphasia, dysarthria and apraxia of speech.

**Design:** Systematic review and thematic synthesis.

**Method:** We included studies employing qualitative methodology which focused upon the perceived or expressed needs, views or experiences of stroke survivors with communication difficulties in relation to the day to day management of their condition following hospital discharge. We searched MEDLINE, EMBASE, PsycINFO, CINAHL, The Cochrane Library and IBSS and undertook grey literature searches. Studies were assessed for methodological quality by two researchers independently and the findings were combined using thematic synthesis.

**Results:** Thirty-two studies were included in the thematic synthesis. The synthesis reveals the ongoing difficulties stroke survivors can experience in coming to terms with the loss of communication and in adapting to life with a communication difficulty. Whilst some were able to adjust, others struggled to maintain their social networks and to participate in activities which were meaningful to them. The challenges experienced by stroke survivors with communication difficulties persisted for many years post-stroke. Four themes relating to longer-term need were developed: Managing communication outside of the home, creating a meaningful role, creating or maintaining a support network and taking control and actively moving forward with life.

**Conclusions:** Understanding the experiences of stroke survivors with communication difficulties is vital for ensuring that longer-term care is designed according to their needs. Wider psychosocial factors must be considered in the rehabilitation of people with post-stroke communication difficulties. Self-management interventions may be appropriate to help this sub-group of stroke survivors manage their condition in the longer-term; however, such approaches must be designed to help survivors to manage the unique psychosocial consequences of post-stroke communication difficulties.

## ARTICLE SUMMARY

### Strengths and limitations of this study

- This is the first systematic review and synthesis of qualitative studies to explore the longer-term needs of stroke survivors with communication difficulties living in the community.
- By synthesising qualitative literature, a greater level of conceptual or theoretical understanding can be gained than by looking at one study in isolation.
- Thematic synthesis is a robust method of synthesis which draws together information from qualitative literature in order to make reasoned recommendations for future intervention development.
- Many of the studies identified did not describe the role of the researcher which may impact upon the data collected and the findings of the synthesis.
- The impact of publication bias in qualitative literature is difficult to assess.

## INTRODUCTION

The global burden of stroke is set to rise. It is predicted that by 2030, there will be 12 million stroke deaths, 70 million stroke survivors and 200 million disability adjusted life years lost due to stroke worldwide<sup>1</sup>. In England, it is estimated that 300 000 people are living with moderate to severe disability following stroke<sup>2</sup>. The disabilities stroke survivors face are complex and there is a high prevalence of unmet need in the years following acute onset<sup>3</sup>. Qualitative research has identified that the transition between hospital and community services is difficult and that many stroke survivors feel unsupported and abandoned in the longer-term<sup>4-6</sup>. Although the importance of supporting stroke survivors in the longer-term has been recognised by policymakers, the precise format and content of such support has yet to be established<sup>2,7,8</sup>. Developing an evidence-based care pathway which meets the complex needs of individuals and families coping with the aftermath of stroke remains a challenge<sup>9-11</sup>.

Up to one third of survivors will experience communication difficulties post-stroke including aphasia, dysarthria or apraxia of speech<sup>12-15</sup> resulting in difficulties with language comprehension, speech production and difficulties with reading and writing. Research suggests that this sub-group of stroke survivors may have particularly poor longer-term outcome<sup>16</sup>, for example, stroke survivors with aphasia living in the community have reduced quality of life compared to those without and participate in fewer activities of daily living<sup>17</sup>. This sub-group are also more likely to suffer from depression<sup>18</sup> and have reduced social interactions<sup>19</sup>. Although stroke survivors with communication difficulties may benefit from longer-term support, the needs of this population in relation to longer-term care have not been explored.

Qualitative research provides in-depth accounts of the views, meanings and experiences of patients and is increasingly seen as an important contributor to complex intervention development<sup>20-22</sup>. In the wider stroke literature systematic reviews and syntheses of qualitative literature have been undertaken<sup>23-25</sup>. However,

1  
2  
3 Walsh et al.<sup>25</sup> and Satink et al.<sup>24</sup> noted the lack of studies involving stroke survivors  
4 with communication difficulties and therefore it is unclear if the findings from such  
5 reviews can be generalised to this population. More recently researchers have  
6 developed strategies to ensure that, wherever possible, those with communication  
7 difficulties can be included in qualitative research<sup>26-28</sup>. There is a growing body of  
8 research in this field which highlights the stroke survivors perspective on living with a  
9 communication difficulty<sup>29</sup>. A recent narrative literature review drew together  
10 qualitative studies exploring stroke survivor's experiences of community aphasia  
11 groups (CAGs)<sup>30</sup>. This review focused specifically upon experiences of CAGs and  
12 did not attempt to synthesise broader experiences of living with a communication  
13 difficulty. To date there has been no systematic review and synthesis of qualitative  
14 research exploring the needs of stroke survivors with communication difficulties in  
15 relation to longer-term care.  
16  
17  
18  
19  
20  
21  
22  
23  
24  
25  
26  
27

28 Systematic reviews of qualitative research draw together study findings, allowing a  
29 greater level of conceptual or theoretical understanding than can be gained by  
30 looking at one study in isolation<sup>31 32</sup>. Qualitative synthesis aims to go beyond a  
31 descriptive summary or aggregation of study findings and create an overall  
32 interpretation of the literature. This review uses thematic synthesis<sup>33</sup> which clearly  
33 distinguishes between synthesis at a descriptive and interpretive level. Two types of  
34 themes are developed: descriptive themes which are a summary of findings across  
35 included studies and analytical themes which translate or interpret study findings  
36 with regards to the research question. By creating an overall interpretation of the  
37 literature in relation to a particular research focus, the findings can inform future  
38 intervention development, clinical practice and policy<sup>31 32</sup>. In order to design a longer-  
39 term care strategy for stroke survivors with communication difficulties, it is important  
40 to synthesise qualitative research findings to better understand the requirements for  
41 longer-term care from the patients' perspective. The current review aimed to explore  
42 the needs of stroke survivors with communication difficulties in relation to longer-  
43 term care.  
44  
45  
46  
47  
48  
49  
50  
51  
52  
53  
54  
55  
56  
57  
58  
59  
60

## METHOD

A systematic review and thematic synthesis<sup>33</sup> of qualitative literature relating to the needs of stroke survivors with communication difficulties living in the community was undertaken. A review protocol was developed but was not registered or published.

### Eligibility criteria

*Study design:* Studies published in English, employing qualitative methodology and qualitative methods of data analysis.

*Population:* Adults (aged 16+) with communication difficulties following stroke (aphasia, dysarthria or apraxia of speech).

*Outcomes:* The perceived or expressed needs, views or experiences of stroke survivors with communication difficulties in relation to the day-to-day management of their condition following hospital discharge (including studies in which carers, friends or relatives shared their perspectives upon the needs, views or experiences of stroke survivors). Studies were excluded where the focus was upon the delivery or evaluation of a specific communication intervention.

### Search terms

Search terms were developed with an information specialist using an iterative process including scoping searches and repeated piloting. In traditional reviews of effectiveness, methods and filters for identifying randomised controlled trials (RCTs) are well established. However, qualitative research is often indexed inconsistently across databases and is difficult to pick up using free text search terms due to the use of creative titles and focus upon findings (as opposed to methods) in abstracts<sup>34</sup>. This poses difficulties when identifying qualitative research systematically<sup>35-37</sup>. Some argue for the use of a broader approach by not including filters in relation to qualitative methodology<sup>38</sup>. However, in this case a qualitative filter<sup>39</sup> was applied due to the unmanageable numbers of citations (48 000) initially returned. This potential limitation was addressed by ensuring that multiple search strategies were used.

1  
2  
3 Search terms were initially developed and run in Ovid Medline and then adapted  
4 according to the capabilities of each database. A copy of the search terms is  
5 available in the online supplementary information.  
6  
7  
8  
9

### 10 11 **Information sources**

12  
13 The following databases of published literature were searched: MEDLINE, EMBASE,  
14 PsycINFO, CINAHL, The Cochrane Library, International Bibliography of the Social  
15 Sciences (IBSS) and AMED. To limit publication bias, the following grey literature  
16 sources were searched: Index to Theses (UK dissertations and Theses), ProQuest  
17 (international dissertations and theses) and Web of Science conference proceedings.  
18 Searches were conducted week commencing 2<sup>nd</sup> February (Week 5, 2015) and  
19 databases were searched from inception. To ensure that the search was  
20 comprehensive, other search strategies were also implemented including; 1)  
21 Reviewing the reference lists of studies meeting inclusion criteria, 2) reverse citation  
22 search of studies meeting inclusion criteria and 3) reference list check and reverse  
23 citation search of an existing systematic review of qualitative literature in stroke care  
24  
25  
26  
27  
28  
29  
30  
31  
32  
33  
34  
35  
36  
37  
38  
39  
40  
41  
42  
43  
44  
45  
46  
47  
48  
49  
50  
51  
52  
53  
54  
55  
56  
57  
58  
59  
60

### **Study selection and data extraction**

Studies were screened and selected firstly based upon title and abstract review and then selected following full text review. Title and full text screening and selection was performed independently by the first author and another researcher for all studies. Discrepancies were resolved by consensus with the second and third authors.

Data extracted included study aim(s), participant characteristics (age, gender, type of communication difficulty, time post-stroke), sample size, country, study setting and methodology (method of data collection, method of analysis). Findings of included studies were also used to inform the thematic synthesis (see data synthesis). Double data extraction was completed for 30% of the included studies and compared to ensure agreement levels were high.

## Quality assessment

There is substantial debate concerning the criteria that should be used to determine study quality in qualitative research<sup>41</sup>. The National Institute for Health and Care Excellence (NICE) public health guidance qualitative appraisal checklist<sup>42</sup> was used for assessment of methodological quality in the current review. NICE created the checklist based upon the broad issues which are generally accepted to affect validity in qualitative research<sup>42</sup>. The checklist comprises of 14 domains including theoretical rationale (appropriateness, clarity), study design, data collection, trustworthiness (role of the researcher, context, reliable methods), analysis (rigorous, rich data, reliable, convincing, relevance to aims), conclusions and ethics. The researcher may endorse the presence or absence of the domain characteristic or mark as unclear/not reported. The checklist also has an overall assessment of study quality which can be marked (++) 'All or most of the checklist criteria have been fulfilled, where they have not been fulfilled the conclusions are very unlikely to alter' or (+) 'Some of the checklist criteria have been fulfilled, where they have not been fulfilled, or not adequately described, the conclusions are unlikely to alter' or (-) 'Few or no checklist criteria have been fulfilled and the conclusions are likely or very likely to alter'. In addition to being completed by one researcher, quality assessment was performed by a second researcher for 30% of the included studies. Discrepancies were resolved by discussion and consensus by a third reviewer and remaining quality assessments were revised in line with the discussion to ensure consistency.

Quality assessment was not used to exclude studies but to highlight potential limitations of the research. Although all studies were included in the data synthesis, the findings of lower quality studies were reviewed to ensure that they did not contradict the findings of higher quality studies and to ensure that they did not make a disproportionate contribution to the development of the thematic synthesis.

## Data synthesis

There is no consensus on the most appropriate method for the synthesis of qualitative data<sup>35 43</sup> and a number of approaches have been developed including



1  
2  
3 qualitative meta-synthesis<sup>44</sup>, meta-ethnography<sup>31 32</sup> and thematic synthesis<sup>33 38</sup>. In  
4 this review studies were combined using thematic synthesis<sup>33 38</sup>. This method of  
5 synthesis was specifically formulated by the Evidence for Policy and Practice  
6 Information and Co-ordinating Centre (EPPI centre) to organise findings from  
7 qualitative literature to enable reasoned hypotheses about intervention need,  
8 appropriateness and acceptability<sup>45</sup>. Like meta-synthesis and meta-ethnography,  
9 thematic synthesis allows for a deeper exploration of findings which goes beyond  
10 narrative summary<sup>33 38</sup>. Unlike meta-synthesis and meta-ethnography, thematic  
11 synthesis transparently reports the descriptive and interpretive levels of synthesis;  
12 distinguishing between the 'data-driven' descriptive themes and 'theory-driven'  
13 analytical themes. In thematic synthesis, the review question provides the theoretical  
14 framework to drive the development of the analytical themes. This differs from other  
15 methods of synthesis (e.g. grounded theory or meta-ethnography) which focus upon  
16 theory generation without a pre-existing framework and without the explicit intention  
17 to inform intervention development<sup>31 46</sup>.  
18  
19  
20  
21  
22  
23  
24  
25  
26  
27  
28  
29  
30

31 Key findings (supported by relevant quotations) from each included study were  
32 extracted and free coded line by line using QSR NVivo software version 10. Groups  
33 of descriptive codes were formed based on similarities between the free codes.  
34 Through discussion with a second reviewer and a wider review team, the contents of  
35 each of the groups of descriptive codes were explored and further refined to create  
36 descriptive themes<sup>33 38</sup>. Analytical themes were developed through an iterative  
37 process which included discussion of the links between the descriptive themes and  
38 the implications of these upon the needs of stroke survivors with communication  
39 difficulties and future intervention development<sup>24 33 47</sup>. Analytical themes were  
40 developed with help from the wider review team and by gaining feedback on draft  
41 analytical themes from a peer review group in the research unit.  
42  
43  
44  
45  
46  
47  
48  
49  
50  
51  
52  
53  
54  
55  
56  
57  
58  
59  
60

## RESULTS

### [Figure 1: PRISMA flow diagram of study selection]

Thirty-two citations were identified which were eligible for inclusion in the review<sup>48-79</sup>. The PRISMA flow diagram of study selection is shown in figure 1. Once duplicates had been removed, 9496 records were screened for eligibility and full text was sought for 80 citations. 48 were excluded; 21 studies which did not focus upon the outcome of interest<sup>80-100</sup>, 11 studies which did not use qualitative methods or qualitative methods of data analysis<sup>101-111</sup>, 6 which were not original research (e.g. were commentaries or book reviews)<sup>112-117</sup>, 4 for which we were unable to obtain full text<sup>118-121</sup>, 3 which did not include the population of interest<sup>122-124</sup>, and 3 ongoing pieces of research for which the results were not yet available<sup>125-127</sup>.

### Study characteristics

Table 1 shows the characteristics of included studies.

The experiences of 518 stroke survivors with communication difficulties were reported. Studies reporting gender included 249 male and 220 female participants; ages ranged from 29 to 91. Sample sizes ranged from three<sup>60 104</sup> to fifty<sup>74 79</sup>. The majority of studies identified included participants with aphasia (29 out of 32). Only five studies reported including participants with dysarthria<sup>48-50 59 78</sup> and one study included participants with apraxia of speech<sup>48</sup>. The time post-stroke varied; the participants in 21 studies had a mean time post-stroke of more than 12 months and the participants in five studies had a mean time post-stroke of less than 12 months<sup>49 59 62 63 77</sup>.

**Table 1:** Characteristics of included studies

| Authors                     | Aim of study                                                                                                                                                                   | L&C difficulty                         | Size | Country   | Setting   | Age range | Gender               | Time post-stroke                            | Method of data collection                        | Time points    | Method of analysis                     | Overall assessment of methodological quality |
|-----------------------------|--------------------------------------------------------------------------------------------------------------------------------------------------------------------------------|----------------------------------------|------|-----------|-----------|-----------|----------------------|---------------------------------------------|--------------------------------------------------|----------------|----------------------------------------|----------------------------------------------|
| Baylor et al. <sup>48</sup> | To explore the similarities and differences in self-reported restrictions in communicative participation across different communication disorders in community-dwelling adults | Aphasia, Apraxia of Speech, Dysarthria | 44   | USA       | Community | 37-88     | 21 male<br>23 female | Mean 8.2 years (SD 7.4, range 0.5-24)       | Interview                                        | One interview  | Content analysis                       | -                                            |
| Brady et al. <sup>50</sup>  | To explore the impact of dysarthria on social participation following stroke                                                                                                   | Dysarthria                             | 24   | UK        | Community | 34-86     | 15 male<br>9 female  | Mean (months) 8 (SD 7, range 2-34)          | Interview                                        | One interview  | Grounded theory                        | +                                            |
| Brady et al. <sup>49</sup>  | To explore the perceptions of people with stroke-related dysarthria in relation to the management and rehabilitation of dysarthria                                             | Dysarthria                             | 24   | UK        | Community | 34-86     | 15 male<br>9 female  | Up to 3 years (mean not reported)           | Interview                                        | One interview  | Grounded theory                        | +                                            |
| Brown et al. <sup>52</sup>  | To explore from the perspectives of people with aphasia, the meaning of living successfully with Aphasia                                                                       | Aphasia                                | 25   | Australia | Community | 38-86     | 13 male<br>12 female | Mean (months): 71.5 (SD 62.3, range 24-299) | Interviews and participant generated photography | Two interviews | Interpretive phenomenological analysis | ++                                           |
| Brown et al. <sup>53</sup>  | To explore from the perspectives of family members of individuals with aphasia, the meaning of living successfully with aphasia                                                | Aphasia                                | 24   | Australia | Community | 40-87     | 9 male<br>15 female  | n/a                                         | Interview                                        | One interview  | Interpretive phenomenological analysis | ++                                           |
| Brown et al. <sup>51</sup>  | To explore the perspectives of 25 community dwelling individuals with chronic aphasia on the role of friendship in living successfully with aphasia                            | Aphasia                                | 25   | Australia | Community | 38-86     | 13 male<br>12 female | Mean (months): 71.5 (SD 62.3, range 24-299) | Interviews and participant generated photography | Two interviews | Thematic analysis                      | +                                            |

**Table 1:** Characteristics of included studies (continued)

| Authors                       | Aim of study                                                                                                                                                                                                       | L&C difficulty | Size | Country         | Setting   | Age range | Gender               | Time post-stroke                          | Method of data collection                                                                                           | Time points                                                                                        | Method of analysis                                                                             | Overall assessment of methodological quality |
|-------------------------------|--------------------------------------------------------------------------------------------------------------------------------------------------------------------------------------------------------------------|----------------|------|-----------------|-----------|-----------|----------------------|-------------------------------------------|---------------------------------------------------------------------------------------------------------------------|----------------------------------------------------------------------------------------------------|------------------------------------------------------------------------------------------------|----------------------------------------------|
| Cruice et al. <sup>54</sup>   | To explore how older people with chronic aphasia who are living in the community describe their quality of life in terms of what contributes and what detracts from the quality in their current and future lives. | Aphasia        | 30   | Australia       | Community | 57-88     | 14 male<br>16 female | Mean (months): 41 (SD 25.6, range 10-108) | Interview                                                                                                           | One interview                                                                                      | Content analysis                                                                               | +                                            |
| Cyr <sup>55</sup>             | To investigate factors associated with resilience in individuals with aphasia                                                                                                                                      | Aphasia        | 9    | USA             | Community | 47-73     | ?                    | ?                                         | Interview                                                                                                           | One interview                                                                                      | Content analysis                                                                               | -                                            |
| Dalemans et al. <sup>56</sup> | To explore how people with aphasia perceive participation in society and to investigate influencing factors.                                                                                                       | Aphasia        | 13   | The Netherlands | Community | 45-71     | 7 male<br>6 female   | Range (years): 1-11                       | Interview and Diary                                                                                                 | One interview.<br>Diary kept for 2 weeks prior to interview.                                       | ?                                                                                              | ++                                           |
| Davidson et al. <sup>57</sup> | The aims were to describe everyday communication with friends for older people with and without aphasia and to examine the nature of actual friendship conversations involving a person with aphasia.              | Aphasia        | 15   | Australia       | Community | 64-80     | 7 male<br>8 female   | Mean (months) 42.13 (SD 27.70)            | Observation and communication diary (Phase One)<br><br>Qualitative interview data from simulated recall (Phase Two) | 3 separate observations for a total of 8 hours on one week<br><br>Diary kept on 5 consecutive days | Inductive interpretive analysis (Phase One)<br><br>Systematic qualitative analysis (Phase Two) | +                                            |

Table 1: Characteristics of included studies (continued)

| Authors                       | Aim of study                                                                                                                                                                                                                                                                                                                                                            | L&C difficulty | Size | Country   | Setting   | Age range | Gender              | Time post-stroke                   | Method of data collection | Time points                                                                                                                                                                                      | Method of analysis                                                                                                                    | Overall assessment of methodological quality |
|-------------------------------|-------------------------------------------------------------------------------------------------------------------------------------------------------------------------------------------------------------------------------------------------------------------------------------------------------------------------------------------------------------------------|----------------|------|-----------|-----------|-----------|---------------------|------------------------------------|---------------------------|--------------------------------------------------------------------------------------------------------------------------------------------------------------------------------------------------|---------------------------------------------------------------------------------------------------------------------------------------|----------------------------------------------|
| Davidson et al. <sup>58</sup> | To explore the insider perspective on the impact of aphasia on social communication and social relationships, and to explore components of the interactional function of everyday communication that are identified by older people with aphasia.                                                                                                                       | Aphasia        | 3    | Australia | Community | 69-84     | 1 male<br>2 female  | ?                                  | Interviews and Diary data | One qualitative interview, One stimulated recall interview regarding a previously videotaped recording of an interaction with a communication partner, Diary about communication kept for 7 days | Qualitative interview and stimulated recall interview:<br>Framework Analysis<br><br>Diary: analysed following guidance by Code (2003) | +                                            |
| Dickson et al. <sup>59</sup>  | To investigate the beliefs and experiences of people with dysarthria as a result of stroke in relation to their speech disorder, and to explore the perceived physical, personal and psychosocial impacts of living with dysarthria.                                                                                                                                    | Dysarthria     | 24   | UK        | Community | 34-86     | 15 male<br>9 female | Mean (months)<br>7.07 (range 2-34) | Interview                 | One interview                                                                                                                                                                                    | Grounded theory                                                                                                                       | +                                            |
| Dietz et al. <sup>60</sup>    | The aim of this phenomenological case study was to (a) explore the social role changes experienced by people with aphasia (PWA), (b) understand the use of communication strategies when attempting to reclaim previous roles, and (c) determine whether discrepancies existed between PWA and their potential proxies regarding social role change changes/adaptations | Aphasia        | 3    | USA       | Community | 41-85     | 2 male<br>1 female  | Range (months):<br>24-180          | Interview                 | One interview                                                                                                                                                                                    | Interpretative Phenomenological Analysis                                                                                              | +                                            |

**Table 1:** Characteristics of included studies (continued)

| Authors                       | Aim of study                                                                                                                                                                           | L&C difficulty | Size | Country         | Setting   | Age range | Gender               | Time post-stroke                           | Method of data collection                 | Time points                          | Method of analysis | Overall assessment of methodological quality |
|-------------------------------|----------------------------------------------------------------------------------------------------------------------------------------------------------------------------------------|----------------|------|-----------------|-----------|-----------|----------------------|--------------------------------------------|-------------------------------------------|--------------------------------------|--------------------|----------------------------------------------|
| Fotiadou et al. <sup>61</sup> | To explore the impact of stroke and aphasia on a persons relationships with family, friends and the wider network through analysing blogs written by people with aphasia               | Aphasia        | 10   | USA, UK, Turkey | Community | 29-69     | 4 male<br>6 female   | At least one year (mean not reported)      | Analysis of online blogs                  | n/a                                  | Framework analysis | ++                                           |
| Grohn et al. <sup>63</sup>    | To describe the experience of the first 3 months post-stroke in order to identify factors which facilitate successfully living with aphasia                                            | Aphasia        | 15   | Australia       | Community | 47-90     | 8 male<br>7 female   | 3 months (±2 weeks)                        | Interview                                 | 3 months post-stroke                 | Thematic analysis  | ++                                           |
| Grohn et al. <sup>62</sup>    | To describe the insiders perspective of what is important to living successfully with aphasia and changes that occur throughout the first year post-stroke                             | Aphasia        | 15   | Australia       | Community | 47-90     | 8 male<br>7 female   | 3, 6, 9, 12 months                         | Interviews                                | 3, 6, 9, 12 months post-stroke       | Thematic analysis  | ++                                           |
| Hinckley <sup>128</sup>       | The question "what does it take to live successfully with aphasia?" was posed and answers sought within already published accounts written by people living successfully with aphasia. | Aphasia        | 20   | ?               | Community | ?         | ?                    | ?                                          | Analysis of published personal narratives | N/A                                  | Thematic analysis  | +                                            |
| Howe et al. <sup>66</sup>     | To explore the environmental factors that hinder or support the community participation of adults with aphasia                                                                         | Aphasia        | 25   | Australia       | Community | 34-85     | 15 male<br>10 female | Mean (months) 66.6 (SD 34.4, range 10-137) | Interviews                                | One interview                        | Content analysis   | ++                                           |
| Howe et al. <sup>65</sup>     | To explore the environmental factors that hinder or support the community participation of adults with aphasia.                                                                        | Aphasia        | 10   | Australia       | Community | 35-72     | 6 male<br>4 female   | Mean (months) 97.1 (SD 29.2, range 51-155) | Observation                               | Approximately 3 hours of observation | Content analysis   | ++                                           |

Table 1: Characteristics of included studies (continued)

| Authors                             | Aim of study                                                                                                                                                                                                                                                                                                                      | L&C difficulty | Size | Country | Setting   | Age range | Gender               | Time post-stroke                  | Method of data collection | Time points     | Method of analysis | Overall assessment of methodological quality |
|-------------------------------------|-----------------------------------------------------------------------------------------------------------------------------------------------------------------------------------------------------------------------------------------------------------------------------------------------------------------------------------|----------------|------|---------|-----------|-----------|----------------------|-----------------------------------|---------------------------|-----------------|--------------------|----------------------------------------------|
| Johansson et al. <sup>67</sup>      | To explore how people with aphasia experience having conversations, how they handle communication difficulties and how they perceive their own and their communication partners use of communication strategies                                                                                                                   | Aphasia        | 11   | Sweden  | Community | 48-79     | 7 male<br>4 female   | Mean (months) 38 (range 13-75)    | Interviews                | One interview   | Content analysis   | ++                                           |
| Le Dorze and Brassard <sup>69</sup> | (1) To understand the consequences of aphasia in the terms used by aphasic persons and their friends and relatives to describe their experience of this communication disorder<br>(2) To qualitatively analyse and structure the different descriptions with the concepts of impairment, disability handicap and coping behaviour | Aphasia        | 9    | Canada  | Community | 44-69     | 5 male<br>4 female   | Mean (years) 5.5 (range 2-14)     | Interviews                | One interview   | Grounded Theory    | +                                            |
| Le Dorze et al. <sup>68</sup>       | To explore with a qualitative approach the experience of auditory comprehension problems from the perspective of aphasic persons and their family and friends                                                                                                                                                                     | Aphasia        | 24   | Canada  | Community | 33-71     | 10 male<br>14 female | Mean (months) 55.96 (range 4-147) | Focus group               | One focus group | Phenomenological   | -                                            |
| Le Dorze et al. <sup>70</sup>       | To explore the factors that facilitate or hinder participation according to people who live with aphasia                                                                                                                                                                                                                          | Aphasia        | 17   | Canada  | Community | 51-84     | 12 male<br>5 female  | Mean (years) 5.7 (range 2-18)     | Focus group               | One focus group | Content analysis   | +                                            |

Table 1: Characteristics of included studies (continued)

| Authors                           | Aim of study                                                                                                                                                               | L&C difficulty | Size | Country  | Setting   | Age range | Gender               | Time post-stroke                           | Method of data collection       | Time points                                                                                                                        | Method of analysis                  | Overall assessment of methodological quality |
|-----------------------------------|----------------------------------------------------------------------------------------------------------------------------------------------------------------------------|----------------|------|----------|-----------|-----------|----------------------|--------------------------------------------|---------------------------------|------------------------------------------------------------------------------------------------------------------------------------|-------------------------------------|----------------------------------------------|
| Matos et al. <sup>71</sup>        | To explore and understand the perspectives of Portuguese people with aphasia, family members and speech and language therapists                                            | Aphasia        | 14   | Portugal | Community | 41-80     | 11 male<br>3 female  | Mean (months)<br>27.57 (range 3-89)        | Group and individual interviews | Participants with mild to moderate aphasia were interviewed as a group and those with severe aphasia were interviewed individually | Thematic analysis                   | +                                            |
| Natterlund <sup>72</sup>          | To describe aphasic individuals' experiences of everyday activities and social support in daily life                                                                       | Aphasia        | 20   | Sweden   | Community | 32-70     | 14 male<br>6 female  | Mean (years)<br>6.52 (range 3 to 11 years) | Interview                       | One interview                                                                                                                      | Content analysis                    | ++                                           |
| Niemi and Johansson <sup>73</sup> | To describe and explore how persons with aphasia following stroke experience engaging in everyday occupations                                                              | Aphasia        | 6    | Finland  | Community | 46-75     | 3 male<br>3 female   | Mean (years)<br>2.5 (range 1-4)            | Interviews                      | 2-3 interviews over two months                                                                                                     | Empirical phenomenological analysis | +                                            |
| Parr <sup>74</sup>                | To describe the consequences and significance of long-term aphasia                                                                                                         | Aphasia        | 50   | UK       | Community | ?         | 28 male<br>22 female | Mean (years)<br>7.7 (range 5-21)           | Interview                       | One interview                                                                                                                      | Framework method                    | +                                            |
| Parr <sup>75</sup>                | To track the day-to-day life and experiences of people with severe aphasia, and to document levels of social inclusion and exclusion as they occurred in mundane settings. | Aphasia        | 20   | UK       | Community | 33-91     | 11 male<br>9 female  | Mean (years)<br>4.67 (range 0.9-15)        | Ethnography                     | Visited and observed 3 times in different domestic and care settings                                                               | Framework method                    | -                                            |



**Table 1:** Characteristics of included studies (continued)

| Authors                      | Aim of study                                                                                                                                                                                                                      | L&C difficulty         | Size | Country   | Setting   | Age range | Gender                                     | Time post-stroke                                            | Method of data collection          | Time points                                 | Method of analysis           | Overall assessment of methodological quality |
|------------------------------|-----------------------------------------------------------------------------------------------------------------------------------------------------------------------------------------------------------------------------------|------------------------|------|-----------|-----------|-----------|--------------------------------------------|-------------------------------------------------------------|------------------------------------|---------------------------------------------|------------------------------|----------------------------------------------|
| Pound <sup>76</sup>          | To investigate how people with aphasia understand friends and friendship                                                                                                                                                          | Aphasia                | 28   | UK        | Community | ?         | Phase one: 6 male 6 female<br>Phase two: ? | Phase one: Mean (years) 7.46 (range 1.5-20)<br>Phase two: ? | Interview                          | One interview per participant in each phase | Thematic analysis            | ++                                           |
| Pringle et al. <sup>77</sup> | To gain a greater understanding of the experience of returning home for stroke survivors and their carers.                                                                                                                        | Aphasia                | 4    | UK        | Community | ?         | ?                                          | 1 month                                                     | Interviews and self-report diaries | One interview and diary                     | Phenomenological approach    | -                                            |
| Runne <sup>78</sup>          | To examine the relationship between self-efficacy and a person's choice to participate in life roles involving communication by inviting the experts (i.e. people with speech and language disorders) to share their experiences. | Aphasia and Dysarthria | 5    | USA       | Community | 51-69     | 2 male<br>3 female                         | Mean (years) 8 (range 3-14)                                 | Interview                          | One interview                               | Thematic analysis            | -                                            |
| Worrall et al. <sup>79</sup> | The purpose of this study was to describe the goals of people with aphasia and to code the goals according to the ICF                                                                                                             | Aphasia                | 50   | Australia | Community | ?         | 24 male<br>26 female                       | Mean (months) 54.9 (SD 43.6)                                | Interview                          | One interview                               | Qualitative content analysis | +                                            |

Key: [ ? : Insufficient information]

## Methodological quality of included studies

Table 2 shows the results from the NICE public health qualitative appraisal checklist<sup>42</sup>. A table showing individual study ratings is included in the online supplementary material.

**Table 2:** Methodological quality of included studies

|                                            |                        |                      |                                     |
|--------------------------------------------|------------------------|----------------------|-------------------------------------|
| 1. Theoretical rationale: appropriateness  | Appropriate<br>32      | Inappropriate<br>0   | Not sure<br>0                       |
| 2. Theoretical rationale: clarity          | Clear<br>28            | Unclear<br>1         | Mixed<br>3                          |
| 3. Study design                            | Defensible<br>21       | Indefensible<br>4    | Not sure<br>7                       |
| 4. Data collection                         | Appropriately<br>30    | Inappropriately<br>1 | Not sure/inadequately reported<br>1 |
| 5. Trustworthiness: role of the researcher | Clearly described<br>5 | Unclear<br>2         | Not described<br>25                 |
| 6. Trustworthiness: context                | Clear<br>27            | Unclear<br>5         | Not Sure<br>0                       |
| 7. Trustworthiness: Reliable methods       | Reliable<br>29         | Unreliable<br>1      | Not sure<br>2                       |
| 8. Analysis: Rigorous                      | Rigorous<br>20         | Not rigorous<br>2    | Not sure/not reported<br>10         |
| 9. Analysis: Rich data                     | Rich<br>22             | Poor<br>8            | Not sure/not reported<br>2          |
| 10. Analysis: Reliable                     | Reliable<br>17         | Unreliable<br>1      | Not sure/not reported<br>14         |
| 11. Analysis: Convincing                   | Convincing<br>22       | Not convincing<br>5  | Not sure<br>5                       |
| 12. Analysis: Relevance to aims            | Relevant<br>28         | Irrelevant<br>0      | Partially Relevant<br>4             |
| 13. Conclusions                            | Adequate<br>28         | Inadequate<br>3      | Not sure<br>1                       |
| 14. Ethics                                 | Appropriate<br>20      | Inappropriate<br>1   | Not sure/not reported<br>11         |
| Overall assessment                         | ++<br>12               | +<br>14              | -<br>6                              |

1  
2  
3 The majority of studies performed well across the domains. Studies performed less  
4 well in domain 5 (Trustworthiness: role of the researcher). In this domain, only five  
5 out of 32 studies reflected upon the role of the researcher in the research<sup>52 62 65 66 73</sup>.  
6  
7 In just under half of the studies (14 out of 32) it was unclear if the methods used for  
8 the analysis were reliable (domain 10)<sup>49 50 57-60 65 67 72-75 77 79</sup>. Eight studies were  
9 classified as having 'poor' quality data in domain 9 (Analysis: Rich data) failing to  
10 provide enough depth and detail to provide convincing insight in to participants  
11 experiences<sup>48 54 55 68 69 71 77 79</sup>. In 11 studies the ethical implications of the research  
12 were not adequately reported<sup>48 53 57 58 60 64 68 69 74 78 79</sup>.  
13  
14  
15  
16  
17  
18  
19  
20

21 Six studies were scored in the lowest category for the overall assessment (-)<sup>48 55 68 75</sup>  
22 <sup>77 78</sup>. Of these, three studies were very narrow in description and lacked richness in  
23 the data presented<sup>48 68 77</sup>. The remaining three studies<sup>55 75 78</sup> were problematic in  
24 their overall conclusions. 26 out of 32 studies were scored in the (+) or (++)  
25 categories, suggesting that they scored satisfactorily on most items of the checklist  
26 or where they had not, the conclusions of the study were unlikely to be altered.  
27  
28  
29  
30  
31  
32  
33  
34

### 35 **Thematic synthesis**

36  
37 The progression from descriptive to analytical themes is illustrated in figure 2. Free  
38 coding the findings of included studies produced 597 meaningful segments of data;  
39 these were grouped together according to similarity and new descriptive categories  
40 were created to capture the meaning of the grouped free codes. For example, free  
41 codes which captured emotions (such as loss, anger and sadness) related to the  
42 struggle to communicate were grouped to form the descriptive category 'Emotions  
43 associated with struggle to communicate'. The initial codes were grouped in to 22  
44 descriptive group categories. Meanings were refined and themes developed by  
45 reassessing the data contained within each category to create descriptive themes.  
46 For example, an overlap in experiences was seen between the emotions associated  
47 with struggle to communicate and the self-identity category. This developed in to the  
48 descriptive theme of 'loss of communication and the loss of self-identity'. Although  
49 the current review aimed to identify the needs of stroke survivors with  
50  
51  
52  
53  
54  
55  
56  
57  
58  
59  
60

1  
2  
3 communication difficulties, the studies identified did not ask participants directly  
4 about their needs and participants did not describe their experiences in terms of  
5 need. However, based upon the experiences described, analytical themes were  
6 developed which inferred and theorised about the needs of stroke survivors with  
7 communication difficulties and the impact this may have upon future intervention  
8 development<sup>33 38</sup>.  
9  
10  
11  
12

13  
14  
15  
16 **[Figure 2: The development of descriptive and analytical themes]**  
17  
18  
19

20  
21  
22  
23 **Descriptive themes**  
24

25  
26 Six descriptive themes were developed and are illustrated in table 3.  
27  
28  
29  
30  
31  
32  
33  
34  
35  
36  
37  
38  
39  
40  
41  
42  
43  
44  
45  
46  
47  
48  
49  
50  
51  
52  
53  
54  
55  
56  
57  
58  
59  
60

Table 3: Descriptive Themes

|                                                                      | Descriptive Theme                                                                                                                                                                                                                                                                                                                                                                                                                                                                                                                                                                                                                                                                                                                                                                                                                                                                                                                      | Illustrative quote (s)                                                                                                                                                                                                                                                                                                                                                                                                                       |
|----------------------------------------------------------------------|----------------------------------------------------------------------------------------------------------------------------------------------------------------------------------------------------------------------------------------------------------------------------------------------------------------------------------------------------------------------------------------------------------------------------------------------------------------------------------------------------------------------------------------------------------------------------------------------------------------------------------------------------------------------------------------------------------------------------------------------------------------------------------------------------------------------------------------------------------------------------------------------------------------------------------------|----------------------------------------------------------------------------------------------------------------------------------------------------------------------------------------------------------------------------------------------------------------------------------------------------------------------------------------------------------------------------------------------------------------------------------------------|
| <p>10 <b>Coming to terms with the loss of communication</b></p>      | <p>The extent to which stroke survivors reported being able to come to terms with a communication impairment varied<sup>52 54 55 60 61 64 71 73</sup>. For some the struggle to communicate was an ongoing source of emotional distress, triggering feelings of grief, loss and sadness. However, others had successfully come to terms with their communication impairments. These participants recognised the changes that had taken place in their lives but had been able to adjust to these and find contentment.</p>                                                                                                                                                                                                                                                                                                                                                                                                             | <p><i>What if you only could! Could talk! That's what I ... Everything' (pg. 149)<sup>67</sup></i></p> <p><i>'And I know it'll never be the same as what I was before I had the stroke . . . And as I say I hate to accept it, but I've got to accept it.'</i> (p.1283)<sup>52</sup></p>                                                                                                                                                     |
| <p>17 <b>Loss of communication and the loss of self-identity</b></p> | <p>Communication was often linked to participants sense of self. Being able to communicate as before was regarded as being 'normal'<sup>50 59</sup> and since stroke some participants described feeling as though a piece of themselves was missing. Stroke survivors were conscious of the deficiencies in their speech The constant monitoring and evaluation of speech was also linked to negative self-evaluation when stroke survivors fell short of their own expectations.</p>                                                                                                                                                                                                                                                                                                                                                                                                                                                 | <p><i>'at least 50 percent of me vanished when speech vanished that that's how I think about it' (p. 1831)<sup>73</sup></i></p> <p><i>'... I hate myself because I can't speak right...'</i> (p. 143)<sup>59</sup></p>                                                                                                                                                                                                                       |
| <p>22 <b>Isolation and exclusion from social situations</b></p>      | <p>Participants felt left out of social situations or ignored or excluded specifically due to their communication problems<sup>48-50 56 57 59-61 65-73 75</sup>. The discomfort others felt in talking to stroke survivors with communication difficulties was apparent to the stroke survivor themselves and led to feelings of social isolation. Participants expressed particular difficulty in taking part in group situations<sup>56 61 68-70</sup>. As a consequence, people with post-stroke communication difficulties described either withdrawing from or avoiding communication or social situations altogether<sup>48-50 59-61 68 70 71</sup>. Feelings of embarrassment and a lack of confidence in communication contributed to participant's avoidance of social events<sup>50</sup>. One participant also suggests that fear of stigmatizing reactions contributed to avoidance of social situations<sup>50</sup>.</p> | <p><i>'It's my wife who says I'm antisocial because, even when I visit my in-laws, I'm sick of going to their parties, sit in a corner, and at the end of the party, I get up and leave. I haven't said a damn word in there, and no one was interested, talked to me.'</i> (p.431)<sup>70</sup></p> <p><i>'Instead, they would "go into the background and retreat"... and "do the bare amount of talking"...'</i> (p.275)<sup>48</sup></p> |
| <p>33 <b>A support network of family and friends</b></p>             | <p>Family members were discussed as an ongoing support on a practical and emotional level<sup>62 70</sup>. Although some survivors did rely more on family members for support since having their stroke, reliance on others was not desired by stroke survivors or their carers<sup>56 60 61 63 67 70 73 79</sup>. The importance of friendship and social support outside the family was also expressed by stroke survivors with communication impairments<sup>51-55 57 61 63 64 72 76</sup>. However, also prominent was the difficulty maintaining friendships and the loss of friendship post-stroke<sup>52 56 61 69-72 75 76</sup>.</p>                                                                                                                                                                                                                                                                                          | <p><i>'The informants mentioned that being dependent on their partners was frustrating. Having their partner always nearby brought security but it also made them feel that they were being a burden.'</i> (p. 150)<sup>67</sup></p> <p><i>'...Friends stayed away because they didn't know how to handle the new situation. When time passed by, making contact became even more difficult...'</i> (p. 543)<sup>56</sup></p>                |

1  
2  
3  
4  
5  
6 **Strategies to**  
7 **facilitate**  
8 **successful**  
9 **communication**

Some stroke survivors with communication difficulties used their own strategies to help facilitate conversation<sup>48 49 52 56 60 65 67 69 78</sup>. A wide range of strategies were identified including communication aids<sup>49 52 56 60</sup>, drawing or writing information down<sup>49 52 67</sup> and signalling by raising a hand that they have something to add when in a group situation<sup>48 49 69</sup>. However, some studies identified a stigma attached to using communication aids<sup>56 67</sup>. Strategies used by communication partners of people with post-stroke communication difficulties were also recognised as a facilitator to successful communication<sup>49 52 56-58 63 65 67 68 73 74 77 78</sup>.

*"Interviewer: do you use a communication book? Liv: no, people look strange." (p. 544)<sup>56</sup>*

*'Equally important were the degree to which the CPs were able to adapt their speaking behaviour and whether they used supportive conversation strategies. "Then she wrote! Keywords like this. --- She wrote for me, you see. --- That was damn good, and then I understood at once!"... (p. 1287)<sup>52</sup>*

14 **Activity and**  
15 **meaningful**  
16 **participation in**  
17 **life**

A distinction can be made between stroke survivors who took part in activities they enjoyed or which were meaningful to them and those who no longer took part and remained largely inactive. Where stroke survivors engaged in activities they valued, a sense of achievement, purpose, pleasure and confidence was expressed<sup>49 52 53 55 56 62 63 76</sup>. Establishing a routine was important to stroke survivors with aphasia. Again this gave stroke survivors a sense of purpose and achievement which was not evident in the experiences of those participants where activity had decreased post-stroke<sup>54 60 61 69 71-73 75</sup>.

*'Be involved with everything.' 'Have a hobby.' 'Live as much as you can; do as much as you can.' (p. 1277)<sup>52</sup>*

*'When able to establish a routine and engage in activities around the home, participants often obtained a sense of ability, competency, and independence: "I can do everything for myself" and "I can do it myself. Pretty well." (p. 1415)<sup>62</sup>*

## Analytical themes

Four analytical themes were developed and are described below. It is important to note that the needs highlighted are interconnected and there is significant overlap between themes. For example, the ability to create a meaningful role may be influenced by the availability of a support network or by ability to communicate outside of the home.

### *Managing communication outside of the home*

Managing communication outside of the home was a salient issue for many of the participants in the included studies. Where difficulties with communication arose, these generally occurred away from the safety of the home environment. Many participants were self-conscious about speaking in public and some took steps to hide their communication difficulty by avoiding social interaction completely or by using the bare minimum amount of communication required<sup>49 50 56 59-61 67 69-71 74 75 77 79</sup>.

This protected participants from stigmatising reactions and also protected participants self-identity which was questioned when they were confronted with their communication difficulties<sup>49 50 59 73</sup>. However, by avoiding communicative situations, stroke survivors put themselves at risk of losing friendships and becoming socially isolated<sup>51 52 56 61 69-72 75 76</sup>.

In contrast, rather than avoiding communication, some stroke survivors identified the active use of strategies to adapt their communication and make themselves understood outside of the home, for example, communication aids<sup>49 52 56 60 78</sup>, drawing or writing information down<sup>49 52 67 78</sup> or signalling by raising a hand that they have something to add when in group situation<sup>48 49 69 78</sup>. Other strategies used to facilitate successful communication included sticking to familiar places or people. For example, in one study, when describing the routine of one participant going out for a coffee this was facilitated by the coffee shop staff's knowledge of that individual<sup>65</sup>. Successful interaction was often facilitated by the stroke survivors close family members, for example a participant in Brady et al.<sup>49</sup> stated '(She) [Wife] deciphers for me' (p. 945). Successful interaction could also be facilitated by a competent

1  
2  
3 conversation partner<sup>49 52 56 57 63 65 67 68 73 74 77 78</sup>. Successful interaction helped  
4 participants to gain a sense of self-confidence and self-worth:  
5  
6

7 *"It feels really nice that someone ... someone that just wants to speak with you!*  
8 *One feels like a human being. It feels 'Wow!' ..."*<sup>67</sup> (p.148).  
9  
10

11  
12  
13  
14 Future interventions should support stroke survivors to build confidence in their  
15 communicative abilities in order to re-build their sense of self. A staged programme  
16 whereby stroke survivors are supported to build confidence in their communicative  
17 abilities through setting tasks with increasing difficulty may be appropriate<sup>129</sup>. For  
18 example, the stroke survivor may progress in stages from one to one communication  
19 with someone familiar to communicating outside of the home with support to  
20 communicating outside of the home alone. Training for friends and family may also  
21 need to be considered in order to facilitate optimal communication<sup>130</sup>.  
22  
23  
24  
25  
26  
27  
28  
29

### 30 *Creating a meaningful role*

31  
32  
33 Stroke survivors who described themselves as living successfully with a  
34 communication impairment advocated 'doing things' as being central to their success  
35 <sup>52 62</sup>. Meaningful activity was something which was personal to the stroke survivor  
36 and varied across the studies identified. Meaningful activity could be as simple as  
37 completing chores around the house, establishing a routine or could relate to  
38 activities outside the home. The common theme was that the activity helped the  
39 stroke survivor to have a role which they valued, which they enjoyed or which gave  
40 them a sense of purpose<sup>49 52 53 55 56 62 63 76</sup>.  
41  
42  
43  
44  
45  
46  
47  
48

49  
50 Sometimes stroke survivors struggled to participate in meaningful activities they had  
51 enjoyed prior to stroke due to their communication difficulties<sup>54 60 61 69 71-73 75</sup>. However,  
52 those who described themselves as living successfully with a communication  
53 difficulty sought and took part in other activities which they were able to participate in  
54 and found pleasurable. The flexibility to adapt, adjust and take part in meaningful  
55 activity in spite of post-stroke communication difficulties is significant. In these  
56  
57  
58  
59  
60



1  
2  
3 circumstances the stroke survivor placed value upon activities which they could  
4 participate in as opposed to those which they could not<sup>49 52 53 55 56 62 63 76</sup>. Brown et al.  
5  
6<sup>52</sup> suggest that participating in meaningful activity is a process and describe  
7  
8 participants' experiences of finding a balance between the things they could still do  
9  
10 and those they were no longer capable of.

11  
12 *"I can't read anymore . . . spelling is horrible since my stroke . . . I can't do*  
13 *whatever I used to do. And I would—I feel that I'm useless . . . [But] I'm not*  
14 *depressed and . . . I laugh . . . And I am finding that I am living successfully*  
15 *with the stroke. Yes . . . I go for a walk. I ride the bike (indicates to exercise*  
16 *bike in lounge) . . . go out shopping with my wife. And go for an overseas trip.*  
17 *And I feel alright—yes."*<sup>52</sup> (p.1279)

18  
19  
20  
21  
22  
23 This trial and error process may be important to creating a meaningful role and  
24 therefore to living successfully with post-stroke communication difficulties.  
25  
26

27  
28  
29 One barrier to the creation of a meaningful role was the association between  
30 meaningful activity and communicative ability. Valued roles were often related to  
31 activities outside of the house, which stroke survivors found challenging to manage  
32 due to their communication difficulties. For example, a participant in Cruice et al.<sup>54</sup>  
33 describes his reliance on his wife for going out of the house:  
34  
35  
36  
37

38  
39 *'[Communication] affected one man's movements in his community ("C [wife]*  
40 *and I go to town often but I don't go by myself...[aphasia] stops me going*  
41 *out...[it] depends on how people know you")'*<sup>54</sup> (p. 336).  
42  
43

44  
45 This group also experienced other practical challenges common to many stroke  
46 survivors such as physical disability, fatigue or a lack of transport<sup>60-63 72</sup> which were  
47 additional barriers to participating in meaningful activity.  
48  
49

50  
51  
52  
53 Future interventions should consider the role of meaningful activity in participants'  
54 lives. Establishing a routine or scheduling activities which are valued by the stroke  
55 survivor may be key to living successfully with communication impairment.  
56  
57 Intervention components to facilitate participation in meaningful activity may include  
58  
59  
60

1 supported activity-focused goal setting, action planning or problem solving<sup>129</sup>  
2  
3 Problem solving strategies or adaptations may be needed in order for the stroke  
4 survivor to participate in meaningful activity. This may take time and may involve trial  
5 and error process, particularly with regards to participation in activities which were  
6 valued prior to stroke and those occurring outside of the home environment.  
7  
8  
9  
10

### 11 *Creating or maintaining a support network*

12  
13  
14  
15  
16  
17 Participants readily identified the importance of their family and friends for providing  
18 support on a practical and emotional level<sup>51-55 58 61-64 70 72 76</sup>. As highlighted in the  
19 previous two analytical themes it was often necessary for the stroke survivor to have  
20 some support from family or friends in order to complete activities outside of the  
21 home successfully. This support was highly valued and often enabled participants to  
22 manage activities outside of the home which might not otherwise have been possible.  
23  
24 On the other hand, some stroke survivors discussed a lack of support, resulting in  
25 feelings of social isolation<sup>51 52 56 61 69-72 75 76</sup>. In some circumstances, participants had  
26 friends prior to the stroke that had drifted away over time<sup>51 56 75</sup>. Stroke survivors  
27 sensed that their old friends struggled to communicate with them in the same way  
28 and adapt to the new situation. Participants in the included studies described how  
29 initially friends had rallied round in the months after stroke but then gradually drifted  
30 away over time<sup>51 56 75</sup>. Dalemans et al.<sup>56</sup> describe how friends seemed reluctant to  
31 get in contact with the person with communication difficulties. This suggests some  
32 level of discomfort in accepting or adapting to the stroke survivors problems with  
33 communication:  
34  
35  
36  
37  
38  
39  
40  
41  
42  
43

44 *'...Friends stayed away because they didn't know how to handle the new*  
45 *situation. When time passed by, making contact became even more difficult...'*  
46 *(p. 543)<sup>56</sup>.*  
47  
48  
49  
50

51  
52  
53 Future interventions should recognise the value of obtaining and maintaining social  
54 support. Stroke survivors with communication difficulties may be at risk of losing  
55 friends and having reduced social networks which may impact upon quality of life  
56 and lead to social isolation. Social networks may be difficult to rebuild once lost given  
57  
58  
59  
60

1  
2  
3 the communication challenges this sub-group of stroke survivors face. Some stroke  
4 survivors had identified communication groups as a means of social support and a  
5 way of replacing some of the friends they had lost<sup>51-53 58 61 70</sup>. Stroke survivors  
6 expressed a sense of understanding from others in a similar position which was not  
7 found through other friends or family members. A focus for future interventions may  
8 be to help stroke survivors with communication difficulties to find social support or  
9 sustain their existing social networks; where this is meaningful to the stroke survivor.  
10 Future interventions should acknowledge the role of social networks and explore  
11 how these might be harnessed to further support the stroke survivor and improve  
12 quality of life<sup>131</sup>.  
13  
14  
15  
16  
17  
18  
19  
20  
21  
22

### 23 *Taking control and actively moving forward with life*

24  
25 As detailed in the descriptive themes, living with post-stroke communication  
26 difficulties had resulted in tremendous change which was often associated with loss  
27 for participants compared to pre-stroke life, for example; loss of communication, loss  
28 of self-identity, loss of friendship, and loss of previously valued activities. For many  
29 stroke survivors the sense of loss was, unsurprisingly, associated with significant  
30 emotional distress, triggering feelings of grief, loss and sadness<sup>51 52 61 62 67 73 76 79</sup>.  
31 Many of these changes were beyond the stroke survivor's control, however, in  
32 studies where stroke survivors described themselves as living successfully with the  
33 condition, a sense of taking control and actively moving forward was apparent<sup>49 56 62</sup>  
34  
35  
36  
37  
38  
39  
40  
41  
42  
43  
44  
45  
46  
47  
48  
49  
50  
51  
52  
53  
54  
55  
56  
57  
58  
59  
60

*“But I want to improve myself, even if I wasn't um like I am now and I was  
back to the way I was, I'd still push myself all the time. But they think that I'm  
pushing myself too hard sometimes [slight laugh]. But I don't think so. I just  
think I've got to learn to do these things and I think well I'm going to do it.”*  
(p.1414).

This participant was highly motivated to improve; the authors of the paper state that the participant uses 'improve' in reference to both their communicative and physical abilities. Also apparent within this quote is the participant's belief in their own ability to improve and how the participant 'pushes' to improve on the basis of this belief. A

1  
2  
3 sense of taking control was also linked to independence. Participants in Brown et  
4 al.<sup>52</sup> valued tasks they could complete alone, for example, ordering a meal by  
5 themselves at a restaurant;  
6  
7

8  
9 *"If you're going out for dinner . . . make sure that you are . . . you do it. With*  
10 *yourself"* (p.1278).  
11

12  
13 A participant in Grohn et al.<sup>63</sup> describes how they perceived themselves to be living  
14 successfully with aphasia because they were able to do things independently;  
15  
16

17 *"...because I live on my own and that and I get up, I'm gone out of the place,*  
18 *and I get along-do everything myself and that."* (p. 394).  
19  
20

21  
22  
23 Future interventions should be mindful of the significant loss and emotional upheaval  
24 associated with post-stroke communication difficulties and recognise that stroke  
25 survivors may be at different stages of coming to terms with the changes to their  
26 lives. Different interventions may be appropriate according to the stroke survivors  
27 'readiness' to accept their communication difficulties and move forward with  
28 rebuilding their lives<sup>132 133</sup>. Participants' beliefs in their own ability may also be  
29 related to the sense of taking control. Such experiences sit well with self-efficacy  
30 theory<sup>134</sup> which proposes that a persons belief about their capabilities influences  
31 their ability to perform a task. Future interventions may wish to consider components  
32 which are targeted towards enhancing self-efficacy.  
33  
34  
35  
36  
37  
38  
39  
40  
41  
42  
43  
44  
45  
46  
47  
48  
49  
50  
51  
52  
53  
54  
55  
56  
57  
58  
59  
60

## DISCUSSION

The review identified 32 qualitative studies including 518 stroke survivors with communication difficulties from 9 different countries. Synthesising information from the qualitative literature has provided considerable insight into the longer-term needs of stroke survivors with communication difficulties living in the community. The synthesis reveals the ongoing difficulties stroke survivors can face in coming to terms with the loss of communication and in adapting to life with a communication difficulty. By drawing together findings reported in individual studies significant need for longer-term support was identified. Many of the participants who conveyed needs in relation to longer-term care were a number of years post-stroke which suggests that needs may persist over a significant period of time in the absence of resolution.

Our findings suggest that the biomedical model of illness is inadequate in understanding the full impact of communication disorders<sup>135</sup>. Traditional speech and language therapy approaches are based upon this model; typically focusing upon treating the specific impairment the patient is experiencing<sup>136 137</sup>. However, this synthesis of qualitative research demonstrates that the impact communication difficulties goes beyond symptoms of the medical impairment; influencing social relationships, mood and activities of daily living. The World Health Organisations International Classification of Functioning, Disability and Health (WHO ICF)<sup>138</sup> recognises the complex interplay of biological, psychological and social influences which may influence health. Findings from the current review support this model and suggest that wider psychosocial factors should be considered in the rehabilitation of post-stroke communication difficulties<sup>116</sup>.

Review findings also highlight the complex journey people with communication difficulties go through in adjusting and adapting to post-stroke life. Some were able to come to terms with their communication difficulties, take control and rebuild their lives. Others struggled to adapt and were unable to overcome the loss of previously valued activities and roles. These findings are consistent with established theories of chronic illness such as the chronic illness trajectory proposed by Corbin and

1  
2  
3 Strauss<sup>139 140</sup> and Bury's theory of biographical disruption<sup>141</sup> which explain how  
4 patients and families cope in different ways with their illness journey and the  
5 associated disruption to their lives. It is important to consider whether illness  
6 trajectories can be shaped so that stroke survivors with communication difficulties  
7 who struggle to adapt are better supported to manage their condition.  
8  
9  
10

11  
12  
13  
14 "Self-management" interventions are designed to support patients to cope with the  
15 physical and psychosocial consequences of living with a long-term condition<sup>142 143</sup>.  
16 There is evidence to support the use of self-management interventions in a range of  
17 chronic conditions<sup>144-147</sup> and there is a substantial policy drive towards taking this  
18 approach in stroke care<sup>2 8</sup>. However, the evidence to support the efficacy of self-  
19 management approaches in stroke is mixed<sup>148 149</sup> and a recent systematic review  
20 demonstrated that stroke survivors with aphasia are often excluded from RCTs of  
21 self-management interventions<sup>149</sup>. A significant proportion of self-management  
22 interventions are based upon or adapted from the Chronic Disease Self-  
23 Management programme<sup>146</sup>; a group-based patient education programme which has  
24 been assumed to be applicable across a range of chronic diseases. However,  
25 chronic diseases such as arthritis, diabetes and asthma may follow different  
26 trajectories to stroke<sup>140</sup>. Stroke is sudden and life-threatening at onset and causes  
27 striking and immediate disruption to patients' lives, in contrast to the more subtle  
28 onset and course of other chronic diseases. This suggests that self-management  
29 interventions may need to be designed specifically to meet the needs of stroke  
30 survivors (including those with communication difficulties) as opposed to being  
31 adapted from existing 'one size fits all' approaches<sup>150</sup>.  
32  
33  
34  
35  
36  
37  
38  
39  
40  
41  
42  
43  
44  
45  
46  
47

48 Existing self-management interventions have been criticised for their lack of user  
49 involvement and for being policy driven 'top-down' approaches as opposed to being  
50 driven by the needs and priorities of stakeholders<sup>151-153</sup>. Although there is significant  
51 overlap with the experiences of the general stroke survivor population<sup>24 40 44</sup>; findings  
52 from the current review highlight how post-stroke communication difficulties present  
53 a unique barrier, for example, to participation in meaningful activities or maintenance  
54 of social networks. Although self-management may be a useful concept, the findings  
55  
56  
57  
58  
59  
60

1  
2  
3 of the current review suggest that self-management interventions must be  
4 specifically designed to ensure they meet the needs of stroke survivors with  
5 communication difficulties and support them manage the psychosocial  
6 consequences of the communication difficulty itself. There is a paucity of research  
7 into the development and robust evaluation (RCTs) of psychosocial interventions for  
8 stroke survivors with communication difficulties. However, interest and research in  
9 this field is growing rapidly.<sup>154-157</sup>  
10  
11  
12  
13  
14  
15  
16  
17

### 18 **Strengths and limitations of the review**

19  
20 A strength of the review is that we have used a systematic method to summarise and  
21 interpret existing qualitative research in relation to a specific research question.  
22 Although the themes stay close to the findings of the individual studies; by drawing  
23 the findings together we were able to create an overall interpretation of the literature  
24 in relation to longer-term need. Findings were drawn together in a systematic fashion  
25 and, based on the weight of this evidence, we were able to go beyond a descriptive  
26 summary of study findings by identifying the implications of the synthesis for  
27 understanding and responding to the longer-term needs of this group of stroke  
28 survivors and by making reasoned recommendations for future intervention  
29 development.  
30  
31  
32  
33  
34  
35  
36  
37  
38  
39

40 Two areas of limitation can be identified in this review. Firstly, the quality of the  
41 synthesis is inherently limited by the quality and reporting of the original studies<sup>32 158</sup>.  
42 The results of the quality assessment highlighted the lack of reflexivity in the  
43 included studies. Reflexivity is the researcher's critical reflection upon how their own  
44 position within the research may have influenced the conduct or findings of the study  
45<sup>159 160</sup>. The lack of reflexivity means it is difficult to evaluate levels of researcher bias  
46 in study findings. In the majority of studies, data were collected by researchers who  
47 were also qualified speech and language therapists. This may have had some  
48 influence on the line of questioning or participant's responses or the analysis or  
49 presentation of results.  
50  
51  
52  
53  
54  
55  
56  
57  
58  
59  
60



1  
2  
3 A second limitation is the difficulty assessing publication bias. It is possible there is a  
4 bias towards publishing studies highlighting difficulties post-stroke as opposed to  
5 those highlighting more positive experiences. The current review identified significant  
6 need and this may be a result of biases in publication. It is difficult to quantify the  
7 impact of potential publication bias, however, it is important to note that studies were  
8 identified in the current synthesis which looked at patients who perceived themselves  
9 to be living successfully with aphasia and the factors influencing this<sup>52 53 62-64</sup>. These  
10 studies were of high quality and made a significant contribution to the synthesis of  
11 information.  
12  
13  
14  
15  
16  
17  
18  
19  
20

### 21 **Implications for future research**

22  
23  
24 Future research should explore the possible components of a longer-term care  
25 intervention for stroke survivors with communication difficulties and the feasibility of  
26 self-management as an approach. Few studies explored need within the first year  
27 post-stroke and further information about how survivors with post-stroke  
28 communication difficulties manage their condition following hospital discharge is  
29 required to further understand adaptation and adjustment during this time period and  
30 inform subsequent care strategies.  
31  
32  
33  
34  
35  
36  
37  
38

### 39 **Conclusions**

40  
41 Our synthesis highlights the significant and continuing need for longer-term support  
42 experienced by stroke survivors with communication difficulties. Rehabilitation  
43 services designed around impairment based models of speech therapy may fail to  
44 address the psychosocial consequences of post-stroke communication difficulties  
45 and enable stroke survivors to successfully manage these difficulties within this  
46 context<sup>161</sup>. Self-management interventions may be useful to facilitate the process of  
47 adaptation and adjustment, however, a critical examination of self-management  
48 approaches and their suitability for stroke survivors with communication difficulties is  
49 needed to ensure that such interventions meet the needs of this population.  
50  
51  
52  
53  
54  
55  
56  
57  
58  
59  
60



## Acknowledgements

With thanks to Jessica Hall and Farhat Mahmood for help with citation screening and double data extraction. Thanks also to Diedre Andre for help designing the search strategy, Tom Crocker for helpful suggestions on the first draft of the manuscript and Anne Forster for reviewing the final version of the manuscript.

## Funding

This review was undertaken by the first author as part of a PhD project funded by the David and Anne-Marie Marsden scholarship for stroke rehabilitation (University of Leeds).

## Statement of competing interests

None declared.

## Data sharing statement

No additional data are available.

## Contributor statement

FW contributed to the design of the study, acquired the data, analysed the data and drafted the manuscript. DC contributed to the design of the study and reviewed the manuscript for intellectual content.

## REFERENCES:

1. Feigin VL, Forouzanfar MH, Krishnamurthi R, et al. Global and regional burden of stroke during 1990–2010: findings from the Global Burden of Disease Study 2010. *The Lancet* 2014;**383**(9913):245-55.
2. Department of Health. National Stroke Strategy. 2007. [clahrc-gm.nihr.ac.uk/cms/wp.../DoH-National-Stroke-Strategy-2007.pdf](http://clahrc-gm.nihr.ac.uk/cms/wp.../DoH-National-Stroke-Strategy-2007.pdf) (accessed 17th July 2015).
3. McKeivitt C, Fudge N, Redfern J, et al. Self-reported long-term needs after stroke. *Stroke* 2011;**42**(5):1398-403.
4. Cobley CS, Fisher RJ, Chouliara N, et al. A qualitative study exploring patients' and carers' experiences of Early Supported Discharge services after stroke. *Clin Rehabil* 2013;**27**(8):750-7.
5. Ellis-Hill C, Robison J, Wiles R, et al. Going home to get on with life: Patients and carers experiences of being discharged from hospital following a stroke. *Disability and Rehabilitation* 2009;**31**(2):61-72.
6. O'Connell B, Hanna B, Penney W, et al. Recovery after stroke: a qualitative perspective. *Journal of quality in clinical practice* 2001;**21**(4):120-5.
7. NICE. Stroke rehabilitation: Long-term rehabilitation after stroke. 2013. <https://www.nice.org.uk/guidance/cg162> (accessed 16th July 2015).
8. Intercollegiate Stroke Working Party. *National clinical guideline for stroke, 5th edition*. London: Royal College of Physicians, 2016.
9. Forster A, Dickerson J, Young J, et al. A cluster randomised controlled trial and economic evaluation of a structured training programme for caregivers of inpatients after stroke: the TRACS trial. *Health Technology Assessment (Winchester, England)* 2013;**17**(46):1-216.
10. Forster A, Young J, Chapman K, et al. Cluster Randomized Controlled Trial Clinical and Cost-Effectiveness of a System of Longer-Term Stroke Care. *Stroke* 2015;**46**(8):2212-19.
11. Forster A, Young J, Green J, et al. Structured re-assessment system at 6 months after a disabling stroke: a randomised controlled trial with resource use and cost study. *Age and ageing* 2009:afp095.
12. Arboix A, Martivilalta JL, Garcia JH. Clinical-Study of 227 Patients with Lacunar Infarcts. *Stroke* 1990;**21**(6):842-47.
13. Donkervoort M, Dekker J, van den Ende E, et al. Prevalence of apraxia among patients with a first left hemisphere stroke in rehabilitation centres and nursing homes. *Clinical Rehabilitation* 2000;**14**(2):130-36.
14. Engelter ST, Gostynski M, Papa S, et al. Epidemiology of aphasia attributable to first ischemic stroke - Incidence, severity, fluency, etiology, and thrombolysis. *Stroke* 2006;**37**(6):1379-84.
15. Melo TP, Bogousslavsky J, Vanmelle G, et al. Pure Motor Stroke - a Reappraisal. *Neurology* 1992;**42**(4):789-95.
16. Laska A, Hellblom A, Murray V, et al. Aphasia in acute stroke and relation to outcome. *Journal of internal medicine* 2001;**249**(5):413-22.
17. Hilari K. The impact of stroke: are people with aphasia different to those without? *Disability and rehabilitation* 2011;**33**(3):211-18.
18. Hilari K, Needle JJ, Harrison KL. What are the important factors in health-related quality of life for people with aphasia? A systematic review. *Archives of physical medicine and rehabilitation* 2012;**93**(1):S86-S95. e4.
19. Cruice M, Worrall L, Hickson L. Quantifying aphasic people's social lives in the context of non - aphasic peers. *Aphasiology* 2006;**20**(12):1210-25.
20. MRC. Developing and evaluating complex interventions: new guidance. 2008. [www.mrc.ac.uk/documents/pdf/complex-interventions-guidance/](http://www.mrc.ac.uk/documents/pdf/complex-interventions-guidance/) (accessed 17th July 2015).
21. NICE. Behaviour change: the principles for effective interventions. 2007. <https://www.nice.org.uk/guidance/ph6> (accessed 14th September 2015).

22. NIHR. Patient and public involvement in health and social care research: A handbook for researchers. 2014. [www.nihr.ac.uk/funding/.../RDS-PPI-Handbook-2014-v8-FINAL.pdf](http://www.nihr.ac.uk/funding/.../RDS-PPI-Handbook-2014-v8-FINAL.pdf) (accessed 21st September 2015).
23. Salter K, Hellings C, Foley N, et al. The experience of living with stroke: a qualitative meta-synthesis. *Journal of Rehabilitation Medicine* 2008;**40**(8):595-602.
24. Satink T, Cup EH, Ilott I, et al. Patients' views on the impact of stroke on their roles and self: a thematic synthesis of qualitative studies. *Archives of physical medicine and rehabilitation* 2013;**94**(6):1171-83.
25. Walsh ME, Galvin R, Loughnane C, et al. Factors associated with community reintegration in the first year after stroke: a qualitative meta-synthesis. *Disability and rehabilitation* 2015;**37**(18):1599-608.
26. Dalemans R, Wade DT, van den Heuvel WJA, et al. Facilitating the participation of people with aphasia in research: a description of strategies. *Clinical Rehabilitation* 2009;**23**(10):948-59.
27. Luck AM, Rose ML. Interviewing people with aphasia: Insights into method adjustments from a pilot study. *Aphasiology* 2007;**21**(2):208-24.
28. Simmons-Mackie N, Kagan A. Communication strategies used by 'good' versus 'poor' speaking partners of individuals with aphasia. *Aphasiology* 1999;**13**(9-11):807-20.
29. Simmons-Mackie N, Lynch KE. Qualitative research in aphasia: A review of the literature. *Aphasiology* 2013;**27**(11):1281-301.
30. Attard MC, Lanyon L, Togher L, et al. Consumer perspectives on community aphasia groups: A narrative literature review in the context of psychological well-being. *Aphasiology* 2015;**29**(8):983-1019.
31. Britten N, Campbell R, Pope C, et al. Using meta ethnography to synthesise qualitative research: a worked example. *Journal of health services research & policy* 2002;**7**(4):209-15.
32. Campbell R, Pound P, Pope C, et al. Evaluating meta-ethnography: a synthesis of qualitative research on lay experiences of diabetes and diabetes care. *Social science & medicine* 2003;**56**(4):671-84.
33. Thomas J, Harden A. Methods for the thematic synthesis of qualitative research in systematic reviews. *BMC medical research methodology* 2008;**8**(1):45.
34. Evans D. Database searches for qualitative research. *Journal of the Medical Library Association : JMLA* 2002;**90**(3):290-3.
35. Centre for reviews and dissemination. Systematic reviews: CRD's guidance for undertaking reviews in health care. 2009. <http://www.york.ac.uk/crd/SysRev/ISSLI/WebHelp/SysRev3.htm> (accessed 17th July 2015).
36. Flemming K, Briggs M. Electronic searching to locate qualitative research: evaluation of three strategies. *Journal of advanced nursing* 2007;**57**(1):95-100.
37. Shaw RL, Booth A, Sutton AJ, et al. Finding qualitative research: an evaluation of search strategies. *BMC medical research methodology* 2004;**4**(1):5.
38. Gough D, Oliver S, Thomas J. *An introduction to systematic reviews*. London: Sage, 2012.
39. Wong SS, Wilczynski NL, Haynes RB, et al. Developing optimal search strategies for detecting clinically relevant qualitative studies in MEDLINE. *Stud Health Technol Inform* 2004;**107**(Pt 1):311-6.
40. McKeivitt C, Redfern J, Mold F, et al. Qualitative studies of stroke: a systematic review. *Stroke* 2004;**35**(6):1499-505.
41. Mays N, Pope C. Assessing quality in qualitative research. *British medical journal* 2000;**320**(7226):50.
42. NICE. Methods for the development of NICE public health guidance (third edition). 2012. <https://www.nice.org.uk/process/pmg4/chapter/15-appendix-h-quality-appraisal-checklist-qualitative-studies> (accessed 12th July 2016).
43. Higgins JP, Green S. *Cochrane handbook for systematic reviews of interventions* Version 5.1.0. 2011. [www.cochrane-handbook.org](http://www.cochrane-handbook.org) (accessed 17th July 2015).

- 1
  - 2
  - 3
  - 4
  - 5
  - 6
  - 7
  - 8
  - 9
  - 10
  - 11
  - 12
  - 13
  - 14
  - 15
  - 16
  - 17
  - 18
  - 19
  - 20
  - 21
  - 22
  - 23
  - 24
  - 25
  - 26
  - 27
  - 28
  - 29
  - 30
  - 31
  - 32
  - 33
  - 34
  - 35
  - 36
  - 37
  - 38
  - 39
  - 40
  - 41
  - 42
  - 43
  - 44
  - 45
  - 46
  - 47
  - 48
  - 49
  - 50
  - 51
  - 52
  - 53
  - 54
  - 55
  - 56
  - 57
  - 58
  - 59
  - 60
44. Walsh D, Downe S. Meta - synthesis method for qualitative research: a literature review. *Journal of advanced nursing* 2005;**50**(2):204-11.
45. Barnett-Page E, Thomas J. Methods for the synthesis of qualitative research: a critical review. *BMC medical research methodology* 2009;**9**(1):59.
46. Eaves YD. A synthesis technique for grounded theory data analysis. *Journal of advanced nursing* 2001;**35**(5):654-63.
47. Morton R, Tong A, Howard K, et al. The views of patients and carers in treatment decision making for chronic kidney disease: systematic review and thematic synthesis of qualitative studies. *BmJ* 2010;**340**:c112.
48. Baylor C, Burns M, Eadie T, et al. A qualitative study of interference with communicative participation across communication disorders in adults. *American Journal of Speech-Language Pathology* 2011;**20**(4):269-87.
49. Brady MC, Clark AM, Dickson S, et al. Dysarthria following stroke: the patient's perspective on management and rehabilitation. *Clinical Rehabilitation* 2011;**25**(10):935-52.
50. Brady MC, Clark AM, Dickson S, et al. The impact of stroke-related dysarthria on social participation and implications for rehabilitation. *Disability & Rehabilitation* 2011;**33**(3):178-86.
51. Brown K, Davidson B, Worrall LE, et al. "Making a good time": the role of friendship in living successfully with aphasia. *International Journal of Speechlanguage Pathology* 2013;**15**(2):165-75.
52. Brown K, Worrall L, Davidson B, et al. Snapshots of success: An insider perspective on living successfully with aphasia. *Aphasiology* 2010;**24**(10):1267-95.
53. Brown K, Worrall L, Davidson B, et al. Living successfully with aphasia: family members share their views. *Topics in Stroke Rehabilitation* 2011;**18**(5):536-48.
54. Cruice M, Hill R, Worrall L, et al. Conceptualising quality of life for older people with aphasia. *Aphasiology* 2010;**24**(3):327-47.
55. Cyr R. Resilience in aphasia: Perspectives of stroke survivors and their families [M.Sc.]. University of Alberta (Canada), 2010.
56. Dalemans R, de WL, Wade D, et al. Social participation through the eyes of people with aphasia. *International Journal of Language & Communication Disorders* 2010;**45**(5):537-50.
57. Davidson B, Howe T, Worrall L, et al. Social participation for older people with aphasia: the impact of communication disability on friendships. *Topics in Stroke Rehabilitation* 2008;**15**(4):325-40.
58. Davidson B, Worrall L, Hickson L. Exploring the interactional dimension of social communication: A collective case study of older people with aphasia. *Aphasiology* 2008;**22**(3):235-57.
59. Dickson S, Barbour R, Brady M, et al. Patients' Experiences of Disruptions Associated with Post-Stroke Dysarthria. *International Journal of Language & Communication Disorders* 2008;**43**(2):135-53.
60. Dietz A, Thiessen A, Griffith J, et al. The renegotiation of social roles in chronic aphasia: Finding a voice through AAC. *Aphasiology* 2013;**27**(3):309-25.
61. Fotiadou D, Northcott S, Chatzidaki A, et al. Aphasia blog talk: How does stroke and aphasia affect a person's social relationships? *Aphasiology* 2014;**28**(11):1281-300.
62. Grohn B, Worrall L, Simmons-Mackie N, et al. Living successfully with aphasia during the first year post-stroke: A longitudinal qualitative study. *Aphasiology* 2014;**28**(12):1405-25.
63. Grohn B, Worrall LE, Simmons-Mackie N, et al. The first 3-months post-stroke: what facilitates successfully living with aphasia?. *International Journal of Speechlanguage Pathology* 2012;**14**(4):390-400.
64. Hinckley JJ. Finding Messages in Bottles: Living Successfully with Stroke and Aphasia. *Topics in Stroke Rehabilitation* 2006;**13**(1):25-36.
65. Howe TJ, Worrall LE, Hickson LM. Observing people with aphasia: Environmental factors that influence their community participation. *Aphasiology* 2008;**22**(6):618-43.

- 1
- 2
- 3 66. Howe TJ, Worrall LE, Hickson LMH. Interviews with people with aphasia: environmental factors
- 4 that influence their community participation. *Aphasiology* 2008;**22**(10):1092-120.
- 5 67. Johansson M, Carlsson M, Sonnander K. Communication difficulties and the use of
- 6 communication strategies: From the perspective of individuals with aphasia. *International*
- 7 *Journal of Language & Communication Disorders* 2012;**47**(2):144-55.
- 8 68. Le DG, Brassard C, Larfeuil C, et al. Auditory comprehension problems in aphasia from the
- 9 perspective of aphasic persons and their families and friends. *Disability and Rehabilitation*
- 10 1996;**18**(11):550-8.
- 11 69. Le Dorze G, Brassard C. A description of the consequences of aphasia on aphasic persons and
- 12 their relatives and friends, based on the WHO model of chronic diseases. *Aphasiology*
- 13 1995;**9**(3):239-55.
- 14 70. Le Dorze G, Salois-Belleroise E, Alepins M, et al. A description of the personal and environmental
- 15 determinants of participation several years post-stroke according to the views of people
- 16 who have aphasia. *Aphasiology* 2014;**28**(4):421-39.
- 17 71. Matos MAC, Jesus LM, Cruice M. Consequences of stroke and aphasia according to the ICF
- 18 domains: Views of Portuguese people with aphasia, family members and professionals.
- 19 *Aphasiology* 2014;**28**(7):771-96.
- 20 72. Nätterlund BS. A new life with aphasia: everyday activities and social support. *Scandinavian*
- 21 *Journal of Occupational Therapy* 2010;**17**(2):117-29.
- 22 73. Niemi T, Johansson U. The lived experience of engaging in everyday occupations in persons with
- 23 mild to moderate aphasia. *Disability & Rehabilitation* 2013;**35**(21):1828-34.
- 24 74. Parr S. Psychosocial aspects of aphasia: whose perspectives?. *Folia Phoniatria et Logopedica*
- 25 2001;**53**(5):266-88.
- 26 75. Parr S. Living with severe aphasia: Tracking social exclusion. *Aphasiology* 2007;**21**(1):98-123.
- 27 76. Pound C. An exploration of the friendship experiences of working-age adults with aphasia [Ph.D.].
- 28 Brunel University (United Kingdom), 2013.
- 29 77. Pringle J, Hendry C, McLafferty E, et al. Stroke survivors with aphasia: personal experiences of
- 30 coming home. *British Journal of Community Nursing* 2010;**15**(5):241-3, 45-7.
- 31 78. Runne C. Self-Efficacy in People with Speech or Language Disorders: A Qualitative Study
- 32 [Master's]. University of Washington, 2012.
- 33 79. Worrall L, Sherratt S, Rogers P, et al. What people with aphasia want: Their goals according to
- 34 the ICF. *Aphasiology* 2011;**25**(3):309-22.
- 35 80. Ashton C, Aziz NA, Barwood C, et al. Communicatively accessible public transport for people with
- 36 aphasia: A pilot study. *Aphasiology* 2008;**22**(3):305-20.
- 37 81. Barrow R. Listening to the voice of living life with aphasia: Anne's story. *International Journal of*
- 38 *Language & Communication Disorders* 2008;**43 Suppl 1**:30-46.
- 39 82. Blonski DC, Covert M, Gauthier R, et al. Barriers to and Facilitators of Access and Participation in
- 40 Community-Based Exercise Programmes from the Perspective of Adults with Post-stroke
- 41 Aphasia. *Physiotherapy Canada* 2014;**66**(4):367-75.
- 42 83. Ferguson A, Worrall L, Davidson B, et al. Describing the experience of aphasia rehabilitation
- 43 through metaphor. *Aphasiology* 2010;**24**(6-8):685-96.
- 44 84. Garcia LJ, Barrette J, Laroche C. Perceptions of the obstacles to work reintegration for persons
- 45 with aphasia. *Aphasiology* 2000;**14**(3):269-90.
- 46 85. Greig C, Harper R, Hirst T, et al. Barriers and facilitators to mobile phone use for people with
- 47 aphasia. *Topics in Stroke Rehabilitation* 2008;**15**(4):307-24.
- 48 86. Howe T, Davidson B, Worrall L, et al. 'You needed to rehab ... families as well': family members'
- 49 own goals for aphasia rehabilitation. *International Journal of Language & Communication*
- 50 *Disorders* 2012;**47**(5):511-21.
- 51 87. Jones F, Mandy A, Partridge C. Reasons for recovery after stroke: a perspective based on
- 52 personal experience. *Disability & Rehabilitation* 2008;**30**(7):507-16.
- 53
- 54
- 55
- 56
- 57
- 58
- 59
- 60



- 1  
2  
3 88. Legg L, Stott D, Ellis G, et al. Volunteer Stroke Service (VSS) groups for patients with  
4 communication difficulties after stroke: a qualitative analysis of the value of groups to their  
5 users. *Clinical Rehabilitation* 2007;**21**(9):794-804.
- 6 89. Mackenzie C, Kelly S, Paton G, et al. The Living with Dysarthria group for post-stroke dysarthria:  
7 the participant voice. *International Journal of Language & Communication Disorders*  
8 2013;**48**(4):402-20.
- 9 90. Mitchell K, Skirton H, Monrouxe L. Amelioration, regeneration, acquiescent and discordant: An  
10 exploration of narrative types and metaphor use in people with aphasia. *Disability & Society*  
11 2011;**26**(3):321-35.
- 12 91. Morris K, Ferguson A, Worrall L. A qualitative study of legal and social justice needs for people  
13 with aphasia. *International Journal of Speech-Language Pathology* 2014;**16**(6):541-51.
- 14 92. Mumby K, Whitworth A. Evaluating the effectiveness of intervention in long-term aphasia post-  
15 stroke: the experience from CHANT (Communication Hub for Aphasia in North Tyneside).  
16 *International Journal of Language & Communication Disorders* 2012;**47**(4):398-412.
- 17 93. Mumby K, Whitworth A. Adjustment processes in chronic aphasia after stroke: Exploring multiple  
18 perspectives in the context of a community-based intervention. *Aphasiology* 2013;**27**(4):462-  
19 89.
- 20 94. Northcott S, Hilari K. Why do people lose their friends after a stroke? *International Journal of*  
21 *Language & Communication Disorders* 2011;**46**(5):524-34.
- 22 95. Nystrom M. Aphasia--An existential loneliness: A study on the loss of the world of symbols.  
23 *International Journal of Qualitative Studies on Health and Well-being* 2006;**1**(1):38-49.
- 24 96. Nystrom M. Professional aphasia care trusting the patient's competence while facing existential  
25 issues. *Journal of Clinical Nursing* 2009;**18**(17):2503-10.
- 26 97. Parr S. Coping with aphasia: Conversations with 20 aphasic people. *Aphasiology* 1994;**8**(5):457-66.
- 27 98. Parr S. Everyday reading and writing in aphasia: Role change and the influence of pre-morbid  
28 literacy practice. *Aphasiology* 1995;**9**(3):223-38.
- 29 99. Pearl G, Sage K, Young A. Involvement in volunteering: an exploration of the personal experience  
30 of people with aphasia. *Disability & Rehabilitation* 2011;**33**(19-20):1805-21.
- 31 100. Tregua S, Brown K. What makes a successful peer-led aphasia support group? *Aphasiology*  
32 2013;**27**(5):581-98.
- 33 101. Boles L. Success stories in aphasia. *Topics in Stroke Rehabilitation* 2006;**13**(1):37-43.
- 34 102. Carriero MR, Faglia L, Vignolo LA. Resumption of gainful employment in aphasics: preliminary  
35 findings. *Cortex* 1987;**23**(4):667-72.
- 36 103. Cruice M, Worrall L, Hickson L. Perspectives of quality of life by people with aphasia and their  
37 family: suggestions for successful living. *Topics in Stroke Rehabilitation* 2006;**13**(1):14-24.
- 38 104. Davidson B, Worrall L, Hickson L. Social communication in older age: lessons from people with  
39 aphasia. *Topics in Stroke Rehabilitation* 2006;**13**(1):1-13.
- 40 105. Horton S, Mudd D, Lane J. Is anyone speaking my language? *International Journal of Language*  
41 *and Communication Disorders* 1998;**33**(SUPPL.):126-31.
- 42 106. Lemieux L, Cohen-Schneider R, Holzapfel S. Aphasia and sexuality. *Sexuality and Disability*  
43 2001;**19**(4):253-66.
- 44 107. Parr S, Pound C, Hewitt A. Communication Access to Health and Social Services. *Topics in*  
45 *Language Disorders* 2006;**26**(3):189-98.
- 46 108. Simmons-Mackie N, Damico J. Intervention outcomes: a clinical application of qualitative  
47 methods. *Topics in Language Disorder* 2001;**22**(1):21-36.
- 48 109. Skelly M. Rethinking stroke: Aphasic patients talk back. *The American Journal of Nursing*  
49 1975;**75**(7):1140-42.
- 50 110. Wallace G. Profile of life participation after stroke and aphasia. *Topics in Stroke Rehabilitation*  
51 2010;**17**(6):432-50.
- 52 111. Zemva N. Aphasic patients and their families: Wishes and limits. *Aphasiology* 1999;**13**(3):219-24.
- 53  
54  
55  
56  
57  
58  
59  
60

112. Marshall RC. An introduction to supported conversation for adults with aphasia: Perspectives, problems and possibilities. *Aphasiology* 1998;**12**(9):811-64.
113. Parr S, Duchan J, Pound C, et al. Aphasia inside out: reflections on communication disability. *Disability and society* 2004;**19**(3):276-78.
114. Rolnick M, Hoops HR. Aphasia as seen by the aphasic. *Journal of Speech & Hearing Disorders* 1969;**34**(1):48-53.
115. Schnitzer ML, Goodglass H. The pragmatic basis of aphasia. *Language* 1991;**67**(2):348.
116. Worrall L, Brown K, Cruice M, et al. The evidence for a life-coaching approach to aphasia. *Aphasiology* 2010;**24**(4):497-514.
117. Worrall L, Rose T, Howe T, et al. Developing an evidence-base for accessibility for people with aphasia. *Aphasiology* 2007;**21**(1):124-36.
118. Fretterd CR. Living successfully with aphasia: What it means for speech language pathologists and their clients [M.S.]. The William Paterson University of New Jersey, 2014.
119. Kardosh BM. The Nature of Recovery in Aphasia from Two Perspectives: A Phenomenological Study [Ph.D.]. University of Louisiana at Lafayette, 2011.
120. Klippi A. Qualitative research: analysing aphasic conversations. *Journal of Neurolinguistics* 2000;**13**(4):305-07.
121. Yoshimura T, Maeshima S, Aiko A, et al. The lifestyles of the individuals with severe aphasia: Focusing on the travel experiences. *Stroke* 2004;**35**(6):E320-E20.
122. Ellis C, Focht KL, Grubaugh AL. Perceptions of stroke recovery: an exclusion of communication and cognition. *Neurorehabilitation* 2013;**33**(2):233-9.
123. Lanza M, Prunier S. Breaking through barriers to recovery from a stroke: both sides of the experience. *American Journal of Medical Quality* 2002;**17**(6):249-54.
124. Walshe M, Miller N. Living with acquired dysarthria: the speaker's perspective. *Disability & Rehabilitation* 2011;**33**(3):195-203.
125. Anglade C, Croteau C, Le Dorze G. Understanding the experience of people with communication disability after stroke outside their home in transaction situations. *Stroke* 2013;**44** (12):e214.
126. Foster AM, Worrall LE, Rose ML, et al. Acute post-stroke aphasia management: Multiple perspectives on a single patient journey. *Stroke* 2013;**44** (12):e216.
127. Van Wijck F, Moore H, Morris J, et al. What matters to people after stroke? Using an innovative communication framework to interview people with aphasia about stroke rehabilitation outcomes. *Cerebrovascular Diseases* 2013;**35**:211.
128. Hinckley J. Finding messages in bottles: living successfully with stroke and aphasia. *Topics in stroke rehabilitation* 2006;**13**(1):25.
129. Abraham C, Michie S. A taxonomy of behavior change techniques used in interventions. *Health psychology* 2008;**27**(3):379.
130. Simmons-Mackie N, Raymer A, Armstrong E, et al. Communication Partner Training in Aphasia: A Systematic Review. *Archives of Physical Medicine and Rehabilitation* 2010;**91**(12):1814-37.
131. Reeves D, Blickem C, Vassilev I, et al. The contribution of social networks to the health and self-management of patients with long-term conditions: a longitudinal study. *PloS one* 2014;**9**(6):e98340.
132. Cameron JI, Gignac MAM. "Timing It Right": A conceptual framework for addressing the support needs of family caregivers to stroke survivors from the hospital to the home. *Patient Education and Counseling* 2008;**70**(3):305-14.
133. Prochaska JO, Velicer WF. The transtheoretical model of health behavior change. *American journal of health promotion* 1997;**12**(1):38-48.
134. Bandura A. Self-efficacy: toward a unifying theory of behavioral change. *Psychological review* 1977;**84**(2):191.
135. Wade DT, Halligan P. Do biomedical models of illness make for good healthcare systems? *British Medical Journal* 2004;**329**(7479):1398-401.

- 1  
2  
3 136. Brady MC, Kelly H, Godwin J, et al. Speech and language therapy for aphasia following stroke.  
4 Cochrane Database of Systematic Reviews 2012;**5**:CD000425.  
5 137. Sellars C, Hughes T, Langhorne P. Speech and language therapy for dysarthria due to non-  
6 progressive brain damage. Cochrane Database Syst Rev 2005;**3**.  
7 138. World Health Organization. Towards a common language for Functioning, Disability and Health  
8 ICF. Geneva: World Health Organisation 2002.  
9 139. Corbin JM, Strauss A. A nursing model for chronic illness management based upon the  
10 trajectory framework. Scholarly inquiry for nursing practice 1991;**5**(3):155-74.  
11 140. Burton CR. Re - thinking stroke rehabilitation: The Corbin and Strauss chronic illness trajectory  
12 framework. Journal of Advanced Nursing 2000;**32**(3):595-602.  
13 141. Bury M. Chronic illness as biographical disruption. Sociology of health & illness 1982;**4**(2):167-  
14 82.  
15 142. Barlow J, Wright C, Sheasby J, et al. Self-management approaches for people with chronic  
16 conditions: a review. Patient Educ Couns 2002;**48**(2):177-87.  
17 143. Lorig KR, Holman HR. Self-management education: history, definition, outcomes, and  
18 mechanisms. Annals of behavioral medicine 2003;**26**(1):1-7.  
19 144. Deakin T, McShane C, Cade JE, et al. Group based training for self-management strategies in  
20 people with type 2 diabetes mellitus - art. no. CD003417.pub2. Cochrane Database of  
21 Systematic Reviews 2005(2).  
22 145. Gibson PG, Powell H, Coughlan J, et al. Self-management education and regular practitioner  
23 review for adults with asthma. Cochrane Database Syst Rev 2002;**3**.  
24 146. Lorig KR, Ritter P, Stewart AL, et al. Chronic disease self-management program: 2-year health  
25 status and health care utilization outcomes. Medical care 2001;**39**(11):1217-23.  
26 147. Zwerink M, Brusse-Keizer M, van der Valk PD, et al. Self management for patients with chronic  
27 obstructive pulmonary disease. Cochrane Database Syst Rev 2014;**3**.  
28 148. Fryer CE, Luker JA, McDonnell MN, et al. Self management programmes for quality of life in  
29 people with stroke. The Cochrane Library 2016.  
30 149. Wray F, Clarke D, Forster A. Post-stroke self-management interventions: a systematic review of  
31 effectiveness and investigation of the inclusion of stroke survivors with aphasia. Disability  
32 and Rehabilitation 2017:1-15.  
33 150. Jones F, Riazzi A, Norris M. Self-management after stroke: Time for some more questions?  
34 Disability and Rehabilitation: An International, Multidisciplinary Journal 2013;**35**(3):257-64.  
35 151. Boger EJ, Demain S, Latter S. Self-management: a systematic review of outcome measures  
36 adopted in self-management interventions for stroke. Disability and rehabilitation  
37 2013;**35**(17):1415-28.  
38 152. Greenhalgh T. Patient and public involvement in chronic illness: beyond the expert patient. BMJ  
39 2009;**338**.  
40 153. Kendall E, Rogers A. Extinguishing the social?: state sponsored self - care policy and the Chronic  
41 Disease Self - management Programme. Disability & Society 2007;**22**(2):129-43.  
42 154. Thomas SA, Walker MF, Macniven JA, et al. Communication and Low Mood (CALM): a  
43 randomized controlled trial of behavioural therapy for stroke patients with aphasia. Clinical  
44 rehabilitation 2013;**27**(5):398-408.  
45 155. Ryan B, Hudson K, Worrall L, et al. The Aphasia Action, Success, and Knowledge Programme:  
46 Results from an Australian Phase I Trial of a Speech-Pathology-Led Intervention for People  
47 with Aphasia Early Post Stroke. Brain Impairment 2017:1-15.  
48 156. Hoffstrom K, Laine P. Communication cottage, courses for people with aphasia. International  
49 Journal of Stroke 2016;**11**:154.  
50 157. Patterson R, Goldberg C, Giorgio P. The Living with Stroke & Aphasia Program: Pilot at March of  
51 Dimes Canada. International Journal of Stroke 2015;**10**:95.  
52 158. Dixon-Woods M, Shaw RL, Agarwal S, et al. The problem of appraising qualitative research.  
53 Quality and Safety in Health Care 2004;**13**(3):223-25.  
54  
55  
56  
57  
58  
59  
60



1  
2  
3  
4  
5  
6  
7  
8  
9  
10  
11  
12  
13  
14  
15  
16  
17  
18  
19  
20  
21  
22  
23  
24  
25  
26  
27  
28  
29  
30  
31  
32  
33  
34  
35  
36  
37  
38  
39  
40  
41  
42  
43  
44  
45  
46  
47  
48  
49  
50  
51  
52  
53  
54  
55  
56  
57  
58  
59  
60

159. Berger R. Now I see it, now I don't: Researcher's position and reflexivity in qualitative research. *Qualitative Research* 2015;**15**(2):219-34.

160. Jootun D, McGhee G, Marland GR. Reflexivity: promoting rigour in qualitative research. *Nursing Standard* 2009;**23**(23):42-46.

161. Wade D. Rehabilitation – a new approach. Part four: a new paradigm, and its implications. *Clinical Rehabilitation* 2016;**30**(2):109-18.

For peer review only



Figure 1: PRISMA flow diagram

279x293mm (300 x 300 DPI)

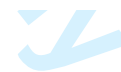

1  
2  
3  
4  
5  
6  
7  
8  
9  
10  
11  
12  
13  
14  
15  
16  
17  
18  
19  
20  
21  
22  
23  
24  
25  
26  
27  
28  
29  
30  
31  
32  
33  
34  
35  
36  
37  
38  
39  
40  
41  
42  
43  
44  
45  
46  
47  
48  
49  
50  
51  
52  
53  
54  
55  
56  
57  
58  
59  
60

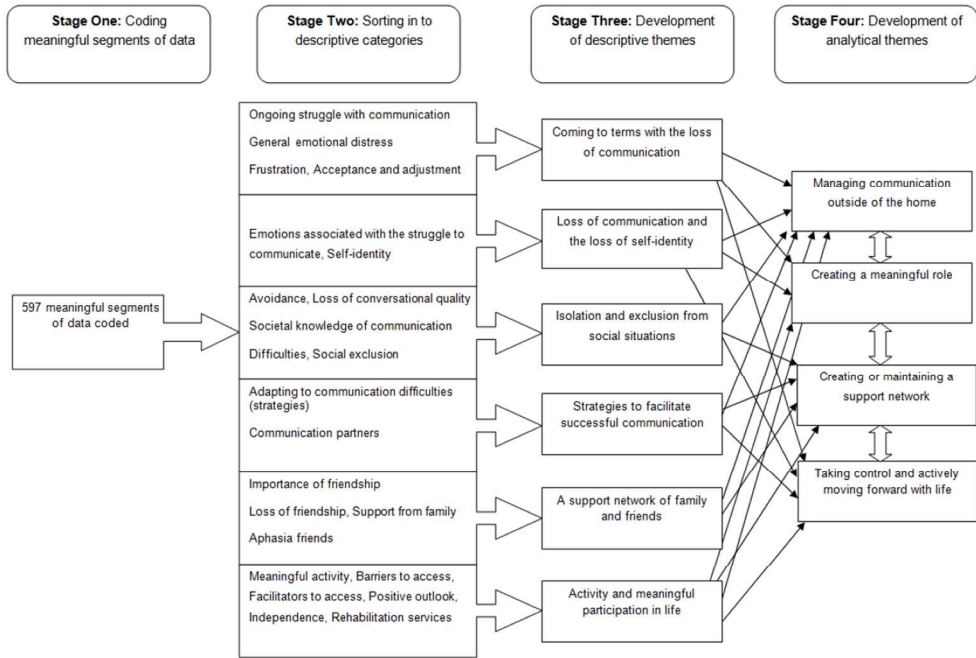

Figure 2: The development of descriptive and analytical themes

265x175mm (300 x 300 DPI)

view only

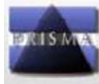

# PRISMA 2009 Checklist

1  
2  
3  
4  
5  
6  
7  
8  
9  
10  
11  
12  
13  
14  
15  
16  
17  
18  
19  
20  
21  
22  
23  
24  
25  
26  
27  
28  
29  
30  
31  
32  
33  
34  
35  
36  
37  
38  
39  
40  
41  
42  
43  
44  
45  
46  
47  
48  
49

| Section/topic                      | #  | Checklist item                                                                                                                                                                                                                                                                                              | Reported on page #                                        |
|------------------------------------|----|-------------------------------------------------------------------------------------------------------------------------------------------------------------------------------------------------------------------------------------------------------------------------------------------------------------|-----------------------------------------------------------|
| <b>TITLE</b>                       |    |                                                                                                                                                                                                                                                                                                             |                                                           |
| Title                              | 1  | Identify the report as a systematic review, meta-analysis, or both.                                                                                                                                                                                                                                         | 1                                                         |
| <b>ABSTRACT</b>                    |    |                                                                                                                                                                                                                                                                                                             |                                                           |
| Structured summary                 | 2  | Provide a structured summary including, as applicable: background; objectives; data sources; study eligibility criteria, participants, and interventions; study appraisal and synthesis methods; results; limitations; conclusions and implications of key findings; systematic review registration number. | 2                                                         |
| <b>INTRODUCTION</b>                |    |                                                                                                                                                                                                                                                                                                             |                                                           |
| Rationale                          | 3  | Describe the rationale for the review in the context of what is already known.                                                                                                                                                                                                                              | 4-5                                                       |
| Objectives                         | 4  | Provide an explicit statement of questions being addressed with reference to participants, interventions, comparisons, outcomes, and study design (PICOS).                                                                                                                                                  | 5                                                         |
| <b>METHODS</b>                     |    |                                                                                                                                                                                                                                                                                                             |                                                           |
| Protocol and registration          | 5  | Indicate if a review protocol exists, if and where it can be accessed (e.g., Web address), and, if available, provide registration information including registration number.                                                                                                                               | 6                                                         |
| Eligibility criteria               | 6  | Specify study characteristics (e.g., PICOS, length of follow-up) and report characteristics (e.g., years considered, language, publication status) used as criteria for eligibility, giving rationale.                                                                                                      | 6                                                         |
| Information sources                | 7  | Describe all information sources (e.g., databases with dates of coverage, contact with study authors to identify additional studies) in the search and date last searched.                                                                                                                                  | 7                                                         |
| Search                             | 8  | Present full electronic search strategy for at least one database, including any limits used, such that it could be repeated.                                                                                                                                                                               | See online supplementary information                      |
| Study selection                    | 9  | State the process for selecting studies (i.e., screening, eligibility, included in systematic review, and, if applicable, included in the meta-analysis).                                                                                                                                                   | 7                                                         |
| Data collection process            | 10 | Describe method of data extraction from reports (e.g., piloted forms, independently, in duplicate) and any processes for obtaining and confirming data from investigators.                                                                                                                                  | 7                                                         |
| Data items                         | 11 | List and define all variables for which data were sought (e.g., PICOS, funding sources) and any assumptions and simplifications made.                                                                                                                                                                       | 7                                                         |
| Risk of bias in individual studies | 12 | Describe methods used for assessing risk of bias of individual studies (including specification of whether this was done at the study or outcome level), and how this information is to be used in any data synthesis.                                                                                      | N/A but included equivalent section on quality assessment |



# PRISMA 2009 Checklist

|                      |    |                                                                                                                                                           |                        |
|----------------------|----|-----------------------------------------------------------------------------------------------------------------------------------------------------------|------------------------|
|                      |    |                                                                                                                                                           | p.8                    |
| Summary measures     | 13 | State the principal summary measures (e.g., risk ratio, difference in means).                                                                             | N/A qualitative review |
| Synthesis of results | 14 | Describe the methods of handling data and combining results of studies, if done, including measures of consistency (e.g., $I^2$ ) for each meta-analysis. | 8/9                    |

Page 1 of 2

| Section/topic                 | #  | Checklist item                                                                                                                                                                                           | Reported on page #     |
|-------------------------------|----|----------------------------------------------------------------------------------------------------------------------------------------------------------------------------------------------------------|------------------------|
| Risk of bias across studies   | 15 | Specify any assessment of risk of bias that may affect the cumulative evidence (e.g., publication bias, selective reporting within studies).                                                             | N/A qualitative review |
| Additional analyses           | 16 | Describe methods of additional analyses (e.g., sensitivity or subgroup analyses, meta-regression), if done, indicating which were pre-specified.                                                         | N/A qualitative review |
| <b>RESULTS</b>                |    |                                                                                                                                                                                                          |                        |
| Study selection               | 17 | Give numbers of studies screened, assessed for eligibility, and included in the review, with reasons for exclusions at each stage, ideally with a flow diagram.                                          | 10                     |
| Study characteristics         | 18 | For each study, present characteristics for which data were extracted (e.g., study size, PICOS, follow-up period) and provide the citations.                                                             | 10-17                  |
| Risk of bias within studies   | 19 | Present data on risk of bias of each study and, if available, any outcome level assessment (see item 12).                                                                                                | N/A qualitative review |
| Results of individual studies | 20 | For all outcomes considered (benefits or harms), present, for each study: (a) simple summary data for each intervention group (b) effect estimates and confidence intervals, ideally with a forest plot. | N/A qualitative review |
| Synthesis of results          | 21 | Present results of each meta-analysis done, including confidence intervals and measures of consistency.                                                                                                  | N/A qualitative review |
| Risk of bias across studies   | 22 | Present results of any assessment of risk of bias across studies (see Item 15).                                                                                                                          | N/A qualitative review |
| Additional analysis           | 23 | Give results of additional analyses, if done (e.g., sensitivity or subgroup analyses, meta-regression [see Item 16]).                                                                                    | N/A qualitative review |

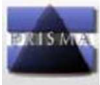

# PRISMA 2009 Checklist

| DISCUSSION          |    |                                                                                                                                                                                      |    |
|---------------------|----|--------------------------------------------------------------------------------------------------------------------------------------------------------------------------------------|----|
| Summary of evidence | 24 | Summarize the main findings including the strength of evidence for each main outcome; consider their relevance to key groups (e.g., healthcare providers, users, and policy makers). | 29 |
| Limitations         | 25 | Discuss limitations at study and outcome level (e.g., risk of bias), and at review-level (e.g., incomplete retrieval of identified research, reporting bias).                        | 31 |
| Conclusions         | 26 | Provide a general interpretation of the results in the context of other evidence, and implications for future research.                                                              | 32 |
| FUNDING             |    |                                                                                                                                                                                      |    |
| Funding             | 27 | Describe sources of funding for the systematic review and other support (e.g., supply of data); role of funders for the systematic review.                                           | 33 |

From: Moher D, Liberati A, Tetzlaff J, Altman DG, The PRISMA Group (2009). Preferred Reporting Items for Systematic Reviews and Meta-Analyses: The PRISMA Statement. PLoS Med 6(6): e1000097. doi:10.1371/journal.pmed1000097

For more information, visit: [www.prisma-statement.org](http://www.prisma-statement.org).

Page 2 of 2
