# Supplementary material for: Longer-term needs of stroke survivors with communication difficulties living in the community: a systematic review and thematic synthesis of qualitative studies
Source: PubMed Central journal article supplement — BMJ Open. 2017 Oct 6;7(10):e017944. doi: 10.1136/bmjopen-2017-017944 (PMC5640038; doi:10.1136/bmjopen-2017-017944), 2017-10-06
Supplement: bmjopen-2017-017944supp001.pdf [file bmjopen-2017-017944supp001.pdf]

## Search Terms (Medline)

1. cerebrovascular disorders/ or exp basal ganglia cerebrovascular disease/ or exp brain ischemia/ or exp carotid artery diseases/ or exp cerebrovascular trauma/ or exp intracranial arterial diseases/ or exp intracranial arteriovenous malformations/ or exp "intracranial embolism and thrombosis"/ or exp intracranial hemorrhages/ or stroke/ or exp brain infarction/ or stroke, lacunar/ or vasospasm, intracranial/ or vertebral artery dissection/ or exp hypoxia, brain/
2. (stroke\$ or post stroke or poststroke or post-stroke or apoplex\$ or cerebral vasc\$ or cerebrovasc\$ or cva or SAH).tw.
3. ((brain or cerebr\$ or cerebell\$ or vertebrobasil\$ or hemispher\$ or intracran\$ or intracerebral or infratentorial or supratentorial or middle cerebr\$ or mca\$ or anterior circulation or basilar artery or vertebral artery) adj5 (isch?emi\$ or infarct\$ or thrombo\$ or emboli\$ or occlus\$ or hypoxi\$)).tw.
4. ((brain\$ or cerebr\$ or cerebell\$ or intracerebral or intracran\$ or parenchymal or intraparenchymal or intraventricular or infratentorial or supratentorial or basal gangli\$ or putaminal or putamen or posterior fossa or hemispher\$ or subarachnoid) adj5 (h?emorrhag\$ or h?ematoma\$ or bleed\$)).tw.
5. exp hemiplegia/ or exp paresis/ or exp aphasia/ or exp gait disorders, neurologic/ or hemianopsia
6. (hemipar\$ or hemipleg\$ or paresis or paretic or aphasi\$ or dysphasi\$ or hemianopsia or hemianopia or transient isch\$ or isch?emic attack\$ or TIA or TIAs).tw.
7. ((unilateral or visual or hemispatial or attentional or spatial) adj5 neglect).tw.
8. 1 or 2 or 3 or 4 or 5 or 6 or 7
9. exp aphasia/
10. language disorders/ or anomia/
11. (aphasi\$ or dysphasi\$ or dysarthri\$ or apraxi\$ or anomia or anomic).tw.
12. ((language or linguistic or communication) adj5 (disorder\$ or impair\$ or problem\$ or dysfunction)).tw.
13. attention/ or arousal/
14. ((attention\$ or concentrat\$ or arousal or alert\$ or vigilance) adj5 (impair\$ or deficit\$ or disorder\$ or problem\$ or diminish\$ or decreas\$ or reduc\$)).tw.
15. (inattention or distract\$).tw.
16. (error adj3 control\$ adj5 (impair\$ or deficit\$ or disorder\$ or problem\$ or diminish\$ or decreas\$ or reduc\$)).tw.
17. (speed adj3 information adj3 process\$ adj5 (impair\$ or deficit\$ or disorder\$ or problem\$ or diminish\$ or decreas\$ or reduc\$)).tw.
18. (mental adj5 (slow\$ or fatig\$)).tw.
19. (cognitive or cognition or attention\$ or memory or concentration or distract\$ or alert\$).tw.
20. ((attention\$ or cognit\$ or scanning\$) adj5 (training or retraining or rehabilitation or intervention or therapy)).tw.
21. language therapy/ or speech therapy/
22. Speech-Language Pathology/
23. ((speech or language or aphasia or dysphasia or dysarthria or apraxia) adj5 (therap\$ or train\$ or rehabilitat\$ or treat\$ or remedi\$ or pathol\$)).tw.
24. remedial therap\$.tw.
25. cognition disorders/
26. ((cognit\$ or memory or mental\$) adj5 (declin\$ or impair\$ or los\$ or deteriorat\$)).tw.
27. (cognit\$ adj2 (abnormal\$ or defect\$ or disorder\$)).tw.
28. (cognit\$ adj abilit\$).tw.
29. or/9-28

30. interview:.mp.

31. experience:.mp.

32. qualitative.tw.

33. 30 or 31 or 32

34. Qualitative Research/

35. 33 or 34

36. 8 and 29 and 35

**Table: Results of quality assessment by study**

| <b>Baylor et al. [48]</b> |                                                                                |                       |
|---------------------------|--------------------------------------------------------------------------------|-----------------------|
| Theoretical Approach      | 1. Is a qualitative approach appropriate?                                      | Appropriate           |
|                           | 2. Is the study clear in what it seeks to do?                                  | Mixed                 |
| Study design              | 3. How defensible/rigorous is the research design/methodology?                 | Indefensible          |
| Data collection           | 4. How well was the data collection carried out?                               | Inappropriately       |
| Trustworthiness           | 5. Is the role of the researcher clearly described?                            | Not described         |
|                           | 6. Is the context clearly described?                                           | Unclear               |
|                           | 7. Were the methods reliable?                                                  | Unreliable            |
| Analysis                  | 8. Is the data analysis sufficiently rigorous?                                 | Rigorous              |
|                           | 9. Is the data 'rich'?                                                         | Poor                  |
|                           | 10. Is the analysis reliable?                                                  | Reliable              |
|                           | 11. Are the findings convincing?                                               | Not sure              |
|                           | 12. Are the findings relevant to the aims of the study?                        | Relevant              |
|                           | 13. Conclusions                                                                | Adequate              |
| Ethics                    | 14. How clear and coherent is the reporting of ethics?                         | Not sure/not reported |
| Overall assessment        | As far as can be ascertained from the paper, how well was the study conducted? | -                     |

| <b>Brady et al. [49]</b> |                                                                                |                       |
|--------------------------|--------------------------------------------------------------------------------|-----------------------|
| Theoretical Approach     | 1. Is a qualitative approach appropriate?                                      | Appropriate           |
|                          | 2. Is the study clear in what it seeks to do?                                  | Clear                 |
| Study design             | 3. How defensible/rigorous is the research design/methodology?                 | Defensible            |
| Data collection          | 4. How well was the data collection carried out?                               | Appropriately         |
| Trustworthiness          | 5. Is the role of the researcher clearly described?                            | Not described         |
|                          | 6. Is the context clearly described?                                           | Clear                 |
|                          | 7. Were the methods reliable?                                                  | Reliable              |
| Analysis                 | 8. Is the data analysis sufficiently rigorous?                                 | Not sure/not reported |
|                          | 9. Is the data 'rich'?                                                         | Not sure/not reported |
|                          | 10. Is the analysis reliable?                                                  | Not sure/not reported |
|                          | 11. Are the findings convincing?                                               | Convincing            |
|                          | 12. Are the findings relevant to the aims of the study?                        | Relevant              |
|                          | 13. Conclusions                                                                | Adequate              |
| Ethics                   | 14. How clear and coherent is the reporting of ethics?                         | Appropriate           |
| Overall assessment       | As far as can be ascertained from the paper, how well was the study conducted? | +                     |

| <b>Brady et al. [50]</b> |                                                                                |                       |
|--------------------------|--------------------------------------------------------------------------------|-----------------------|
| Theoretical Approach     | 1. Is a qualitative approach appropriate?                                      | Appropriate           |
|                          | 2. Is the study clear in what it seeks to do?                                  | Clear                 |
| Study design             | 3. How defensible/rigorous is the research design/methodology?                 | Defensible            |
| Data collection          | 4. How well was the data collection carried out?                               | Appropriately         |
| Trustworthiness          | 5. Is the role of the researcher clearly described?                            | Not described         |
|                          | 6. Is the context clearly described?                                           | Clear                 |
|                          | 7. Were the methods reliable?                                                  | Reliable              |
| Analysis                 | 8. Is the data analysis sufficiently rigorous?                                 | Not sure/not reported |
|                          | 9. Is the data 'rich'?                                                         | Rich                  |
|                          | 10. Is the analysis reliable?                                                  | Not sure/not reported |
|                          | 11. Are the findings convincing?                                               | Convincing            |
|                          | 12. Are the findings relevant to the aims of the study?                        | Relevant              |
|                          | 13. Conclusions                                                                | Adequate              |
| Ethics                   | 14. How clear and coherent is the reporting of ethics?                         | Appropriate           |
| Overall assessment       | As far as can be ascertained from the paper, how well was the study conducted? | +                     |

| <b>Brown et al.[51]</b> |                                                                                |               |
|-------------------------|--------------------------------------------------------------------------------|---------------|
| Theoretical Approach    | 1. Is a qualitative approach appropriate?                                      | Appropriate   |
|                         | 2. Is the study clear in what it seeks to do?                                  | Clear         |
| Study design            | 3. How defensible/rigorous is the research design/methodology?                 | Not Sure      |
| Data collection         | 4. How well was the data collection carried out?                               | Appropriately |
| Trustworthiness         | 5. Is the role of the researcher clearly described?                            | Not described |
|                         | 6. Is the context clearly described?                                           | Clear         |
|                         | 7. Were the methods reliable?                                                  | Reliable      |
| Analysis                | 8. Is the data analysis sufficiently rigorous?                                 | Rigorous      |
|                         | 9. Is the data 'rich'?                                                         | Rich          |
|                         | 10. Is the analysis reliable?                                                  | Unreliable    |
|                         | 11. Are the findings convincing?                                               | Convincing    |
|                         | 12. Are the findings relevant to the aims of the study?                        | Relevant      |
|                         | 13. Conclusions                                                                | Adequate      |
| Ethics                  | 14. How clear and coherent is the reporting of ethics?                         | Appropriate   |
| Overall assessment      | As far as can be ascertained from the paper, how well was the study conducted? | +             |

| <b>Brown et al.[52]</b> |                                                                                |                   |
|-------------------------|--------------------------------------------------------------------------------|-------------------|
| Theoretical Approach    | 1. Is a qualitative approach appropriate?                                      | Appropriate       |
|                         | 2. Is the study clear in what it seeks to do?                                  | Clear             |
| Study design            | 3. How defensible/rigorous is the research design/methodology?                 | Defensible        |
| Data collection         | 4. How well was the data collection carried out?                               | Appropriately     |
| Trustworthiness         | 5. Is the role of the researcher clearly described?                            | Clearly described |
|                         | 6. Is the context clearly described?                                           | Clear             |
|                         | 7. Were the methods reliable?                                                  | Reliable          |
| Analysis                | 8. Is the data analysis sufficiently rigorous?                                 | Rigorous          |
|                         | 9. Is the data 'rich'?                                                         | Rich              |
|                         | 10. Is the analysis reliable?                                                  | Reliable          |
|                         | 11. Are the findings convincing?                                               | Convincing        |
|                         | 12. Are the findings relevant to the aims of the study?                        | Relevant          |
|                         | 13. Conclusions                                                                | Adequate          |
| Ethics                  | 14. How clear and coherent is the reporting of ethics?                         | Appropriate       |
| Overall assessment      | As far as can be ascertained from the paper, how well was the study conducted? | ++                |

| <b>Brown et al.[53]</b> |                                                                                |                       |
|-------------------------|--------------------------------------------------------------------------------|-----------------------|
| Theoretical Approach    | 1. Is a qualitative approach appropriate?                                      | Appropriate           |
|                         | 2. Is the study clear in what it seeks to do?                                  | Clear                 |
| Study design            | 3. How defensible/rigorous is the research design/methodology?                 | Defensible            |
| Data collection         | 4. How well was the data collection carried out?                               | Appropriately         |
| Trustworthiness         | 5. Is the role of the researcher clearly described?                            | Not described         |
|                         | 6. Is the context clearly described?                                           | Clear                 |
|                         | 7. Were the methods reliable?                                                  | Reliable              |
| Analysis                | 8. Is the data analysis sufficiently rigorous?                                 | Rigorous              |
|                         | 9. Is the data 'rich'?                                                         | Rich                  |
|                         | 10. Is the analysis reliable?                                                  | Reliable              |
|                         | 11. Are the findings convincing?                                               | Convincing            |
|                         | 12. Are the findings relevant to the aims of the study?                        | Relevant              |
|                         | 13. Conclusions                                                                | Adequate              |
| Ethics                  | 14. How clear and coherent is the reporting of ethics?                         | Not sure/not reported |
| Overall assessment      | As far as can be ascertained from the paper, how well was the study conducted? | ++                    |

| <b>Cruice et al.[54]</b> |                                                                                |                                |
|--------------------------|--------------------------------------------------------------------------------|--------------------------------|
| Theoretical Approach     | 1. Is a qualitative approach appropriate?                                      | Appropriate                    |
|                          | 2. Is the study clear in what it seeks to do?                                  | Clear                          |
| Study design             | 3. How defensible/rigorous is the research design/methodology?                 | Indefensible                   |
| Data collection          | 4. How well was the data collection carried out?                               | Not sure/inadequately reported |
| Trustworthiness          | 5. Is the role of the researcher clearly described?                            | Not described                  |
|                          | 6. Is the context clearly described?                                           | Clear                          |
|                          | 7. Were the methods reliable?                                                  | Not sure                       |
| Analysis                 | 8. Is the data analysis sufficiently rigorous?                                 | Rigorous                       |
|                          | 9. Is the data 'rich'?                                                         | Poor                           |
|                          | 10. Is the analysis reliable?                                                  | Reliable                       |
|                          | 11. Are the findings convincing?                                               | Convincing                     |
|                          | 12. Are the findings relevant to the aims of the study?                        | Partially Relevant             |
|                          | 13. Conclusions                                                                | Adequate                       |
| Ethics                   | 14. How clear and coherent is the reporting of ethics?                         | Appropriate                    |
| Overall assessment       | As far as can be ascertained from the paper, how well was the study conducted? | +                              |

| <b>Cyr [55]</b>      |                                                                                |                |
|----------------------|--------------------------------------------------------------------------------|----------------|
| Theoretical Approach | 1. Is a qualitative approach appropriate?                                      | Appropriate    |
|                      | 2. Is the study clear in what it seeks to do?                                  | Clear          |
| Study design         | 3. How defensible/rigorous is the research design/methodology?                 | Defensible     |
| Data collection      | 4. How well was the data collection carried out?                               | Appropriately  |
| Trustworthiness      | 5. Is the role of the researcher clearly described?                            | Not described  |
|                      | 6. Is the context clearly described?                                           | Unclear        |
|                      | 7. Were the methods reliable?                                                  | Reliable       |
| Analysis             | 8. Is the data analysis sufficiently rigorous?                                 | Not rigorous   |
|                      | 9. Is the data 'rich'?                                                         | Poor           |
|                      | 10. Is the analysis reliable?                                                  | Reliable       |
|                      | 11. Are the findings convincing?                                               | Not convincing |
|                      | 12. Are the findings relevant to the aims of the study?                        | Relevant       |
|                      | 13. Conclusions                                                                | Inadequate     |
| Ethics               | 14. How clear and coherent is the reporting of ethics?                         | Appropriate    |
| Overall assessment   | As far as can be ascertained from the paper, how well was the study conducted? | -              |

| <b>Dalemans et al. [56]</b> |                                                                                |               |
|-----------------------------|--------------------------------------------------------------------------------|---------------|
| Theoretical Approach        | 1. Is a qualitative approach appropriate?                                      | Appropriate   |
|                             | 2. Is the study clear in what it seeks to do?                                  | Clear         |
| Study design                | 3. How defensible/rigorous is the research design/methodology?                 | Defensible    |
| Data collection             | 4. How well was the data collection carried out?                               | Appropriately |
| Trustworthiness             | 5. Is the role of the researcher clearly described?                            | Not described |
|                             | 6. Is the context clearly described?                                           | Clear         |
|                             | 7. Were the methods reliable?                                                  | Reliable      |
| Analysis                    | 8. Is the data analysis sufficiently rigorous?                                 | Rigorous      |
|                             | 9. Is the data 'rich'?                                                         | Rich          |
|                             | 10. Is the analysis reliable?                                                  | Reliable      |
|                             | 11. Are the findings convincing?                                               | Convincing    |
|                             | 12. Are the findings relevant to the aims of the study?                        | Relevant      |
|                             | 13. Conclusions                                                                | Adequate      |
| Ethics                      | 14. How clear and coherent is the reporting of ethics?                         | Appropriate   |
| Overall assessment          | As far as can be ascertained from the paper, how well was the study conducted? | ++            |

| <b>Davidson et al. [57]</b> |                                                                                |                       |
|-----------------------------|--------------------------------------------------------------------------------|-----------------------|
| Theoretical Approach        | 1. Is a qualitative approach appropriate?                                      | Appropriate           |
|                             | 2. Is the study clear in what it seeks to do?                                  | Clear                 |
| Study design                | 3. How defensible/rigorous is the research design/methodology?                 | Defensible            |
| Data collection             | 4. How well was the data collection carried out?                               | Appropriately         |
| Trustworthiness             | 5. Is the role of the researcher clearly described?                            | Not described         |
|                             | 6. Is the context clearly described?                                           | Clear                 |
|                             | 7. Were the methods reliable?                                                  | Reliable              |
| Analysis                    | 8. Is the data analysis sufficiently rigorous?                                 | Not rigorous          |
|                             | 9. Is the data 'rich'?                                                         | Rich                  |
|                             | 10. Is the analysis reliable?                                                  | Not sure/not reported |
|                             | 11. Are the findings convincing?                                               | Convincing            |
|                             | 12. Are the findings relevant to the aims of the study?                        | Relevant              |
|                             | 13. Conclusions                                                                | Adequate              |
| Ethics                      | 14. How clear and coherent is the reporting of ethics?                         | Not sure/not reported |
| Overall assessment          | As far as can be ascertained from the paper, how well was the study conducted? | +                     |

| <b>Davidson et al. [58]</b> |                                                                                |                       |
|-----------------------------|--------------------------------------------------------------------------------|-----------------------|
| Theoretical Approach        | 1. Is a qualitative approach appropriate?                                      | Appropriate           |
|                             | 2. Is the study clear in what it seeks to do?                                  | Clear                 |
| Study design                | 3. How defensible/rigorous is the research design/methodology?                 | Not Sure              |
| Data collection             | 4. How well was the data collection carried out?                               | Appropriately         |
| Trustworthiness             | 5. Is the role of the researcher clearly described?                            | Not described         |
|                             | 6. Is the context clearly described?                                           | Clear                 |
|                             | 7. Were the methods reliable?                                                  | Reliable              |
| Analysis                    | 8. Is the data analysis sufficiently rigorous?                                 | Rigorous              |
|                             | 9. Is the data 'rich'?                                                         | Rich                  |
|                             | 10. Is the analysis reliable?                                                  | Not sure/not reported |
|                             | 11. Are the findings convincing?                                               | Convincing            |
|                             | 12. Are the findings relevant to the aims of the study?                        | Relevant              |
|                             | 13. Conclusions                                                                | Adequate              |
| Ethics                      | 14. How clear and coherent is the reporting of ethics?                         | Not sure/not reported |
| Overall assessment          | As far as can be ascertained from the paper, how well was the study conducted? | +                     |

| <b>Dickson et al. [59]</b> |                                                                                |                       |
|----------------------------|--------------------------------------------------------------------------------|-----------------------|
| Theoretical Approach       | 1. Is a qualitative approach appropriate?                                      | Appropriate           |
|                            | 2. Is the study clear in what it seeks to do?                                  | Clear                 |
| Study design               | 3. How defensible/rigorous is the research design/methodology?                 | Defensible            |
| Data collection            | 4. How well was the data collection carried out?                               | Appropriately         |
| Trustworthiness            | 5. Is the role of the researcher clearly described?                            | Not described         |
|                            | 6. Is the context clearly described?                                           | Clear                 |
|                            | 7. Were the methods reliable?                                                  | Reliable              |
| Analysis                   | 8. Is the data analysis sufficiently rigorous?                                 | Not sure/not reported |
|                            | 9. Is the data 'rich'?                                                         | Rich                  |
|                            | 10. Is the analysis reliable?                                                  | Not sure/not reported |
|                            | 11. Are the findings convincing?                                               | Convincing            |
|                            | 12. Are the findings relevant to the aims of the study?                        | Relevant              |
|                            | 13. Conclusions                                                                | Adequate              |
| Ethics                     | 14. How clear and coherent is the reporting of ethics?                         | Appropriate           |
| Overall assessment         | As far as can be ascertained from the paper, how well was the study conducted? | +                     |

| <b>Dietz et al. [60]</b> |                                                                                |                       |
|--------------------------|--------------------------------------------------------------------------------|-----------------------|
| Theoretical Approach     | 1. Is a qualitative approach appropriate?                                      | Appropriate           |
|                          | 2. Is the study clear in what it seeks to do?                                  | Clear                 |
| Study design             | 3. How defensible/rigorous is the research design/methodology?                 | Not Sure              |
| Data collection          | 4. How well was the data collection carried out?                               | Appropriately         |
| Trustworthiness          | 5. Is the role of the researcher clearly described?                            | Not described         |
|                          | 6. Is the context clearly described?                                           | Clear                 |
|                          | 7. Were the methods reliable?                                                  | Reliable              |
| Analysis                 | 8. Is the data analysis sufficiently rigorous?                                 | Not sure/not reported |
|                          | 9. Is the data 'rich'?                                                         | Rich                  |
|                          | 10. Is the analysis reliable?                                                  | Not sure/not reported |
|                          | 11. Are the findings convincing?                                               | Convincing            |
|                          | 12. Are the findings relevant to the aims of the study?                        | Relevant              |
|                          | 13. Conclusions                                                                | Adequate              |
| Ethics                   | 14. How clear and coherent is the reporting of ethics?                         | Not sure/not reported |
| Overall assessment       | As far as can be ascertained from the paper, how well was the study conducted? | +                     |

| <b>Fotiadou et al. [61]</b> |                                                                                |               |
|-----------------------------|--------------------------------------------------------------------------------|---------------|
| Theoretical Approach        | 1. Is a qualitative approach appropriate?                                      | Appropriate   |
|                             | 2. Is the study clear in what it seeks to do?                                  | Clear         |
| Study design                | 3. How defensible/rigorous is the research design/methodology?                 | Defensible    |
| Data collection             | 4. How well was the data collection carried out?                               | Appropriately |
| Trustworthiness             | 5. Is the role of the researcher clearly described?                            | Not described |
|                             | 6. Is the context clearly described?                                           | Clear         |
|                             | 7. Were the methods reliable?                                                  | Reliable      |
| Analysis                    | 8. Is the data analysis sufficiently rigorous?                                 | Rigorous      |
|                             | 9. Is the data 'rich'?                                                         | Rich          |
|                             | 10. Is the analysis reliable?                                                  | Reliable      |
|                             | 11. Are the findings convincing?                                               | Convincing    |
|                             | 12. Are the findings relevant to the aims of the study?                        | Relevant      |
|                             | 13. Conclusions                                                                | Adequate      |
| Ethics                      | 14. How clear and coherent is the reporting of ethics?                         | Appropriate   |
| Overall assessment          | As far as can be ascertained from the paper, how well was the study conducted? | ++            |

| <b>Grohn et al. [62]</b> |                                                                                |                   |
|--------------------------|--------------------------------------------------------------------------------|-------------------|
| Theoretical Approach     | 1. Is a qualitative approach appropriate?                                      | Appropriate       |
|                          | 2. Is the study clear in what it seeks to do?                                  | Clear             |
| Study design             | 3. How defensible/rigorous is the research design/methodology?                 | Defensible        |
| Data collection          | 4. How well was the data collection carried out?                               | Appropriately     |
| Trustworthiness          | 5. Is the role of the researcher clearly described?                            | Clearly described |
|                          | 6. Is the context clearly described?                                           | Clear             |
|                          | 7. Were the methods reliable?                                                  | Reliable          |
| Analysis                 | 8. Is the data analysis sufficiently rigorous?                                 | Rigorous          |
|                          | 9. Is the data 'rich'?                                                         | Rich              |
|                          | 10. Is the analysis reliable?                                                  | Reliable          |
|                          | 11. Are the findings convincing?                                               | Convincing        |
|                          | 12. Are the findings relevant to the aims of the study?                        | Relevant          |
|                          | 13. Conclusions                                                                | Adequate          |
| Ethics                   | 14. How clear and coherent is the reporting of ethics?                         | Appropriate       |
| Overall assessment       | As far as can be ascertained from the paper, how well was the study conducted? | ++                |

| <b>Grohn et al. [63]</b> |                                                                                |               |
|--------------------------|--------------------------------------------------------------------------------|---------------|
| Theoretical Approach     | 1. Is a qualitative approach appropriate?                                      | Appropriate   |
|                          | 2. Is the study clear in what it seeks to do?                                  | Clear         |
| Study design             | 3. How defensible/rigorous is the research design/methodology?                 | Defensible    |
| Data collection          | 4. How well was the data collection carried out?                               | Appropriately |
| Trustworthiness          | 5. Is the role of the researcher clearly described?                            | Not described |
|                          | 6. Is the context clearly described?                                           | Clear         |
|                          | 7. Were the methods reliable?                                                  | Reliable      |
| Analysis                 | 8. Is the data analysis sufficiently rigorous?                                 | Rigorous      |
|                          | 9. Is the data 'rich'?                                                         | Rich          |
|                          | 10. Is the analysis reliable?                                                  | Reliable      |
|                          | 11. Are the findings convincing?                                               | Convincing    |
|                          | 12. Are the findings relevant to the aims of the study?                        | Relevant      |
|                          | 13. Conclusions                                                                | Adequate      |
| Ethics                   | 14. How clear and coherent is the reporting of ethics?                         | Appropriate   |
| Overall assessment       | As far as can be ascertained from the paper, how well was the study conducted? | ++            |

| <b>Hinckley [64]</b> |                                                                                |                       |
|----------------------|--------------------------------------------------------------------------------|-----------------------|
| Theoretical Approach | 1. Is a qualitative approach appropriate?                                      | Appropriate           |
|                      | 2. Is the study clear in what it seeks to do?                                  | Clear                 |
| Study design         | 3. How defensible/rigorous is the research design/methodology?                 | Not Sure              |
| Data collection      | 4. How well was the data collection carried out?                               | Appropriately         |
| Trustworthiness      | 5. Is the role of the researcher clearly described?                            | Not described         |
|                      | 6. Is the context clearly described?                                           | Unclear               |
|                      | 7. Were the methods reliable?                                                  | Reliable              |
| Analysis             | 8. Is the data analysis sufficiently rigorous?                                 | Not sure/not reported |
|                      | 9. Is the data 'rich'?                                                         | Rich                  |
|                      | 10. Is the analysis reliable?                                                  | Reliable              |
|                      | 11. Are the findings convincing?                                               | Convincing            |
|                      | 12. Are the findings relevant to the aims of the study?                        | Relevant              |
|                      | 13. Conclusions                                                                | Adequate              |
| Ethics               | 14. How clear and coherent is the reporting of ethics?                         | Not sure/not reported |
| Overall assessment   | As far as can be ascertained from the paper, how well was the study conducted? | +                     |

| <b>Howe et al. [65]</b> |                                                                                |                       |
|-------------------------|--------------------------------------------------------------------------------|-----------------------|
| Theoretical Approach    | 1. Is a qualitative approach appropriate?                                      | Appropriate           |
|                         | 2. Is the study clear in what it seeks to do?                                  | Clear                 |
| Study design            | 3. How defensible/rigorous is the research design/methodology?                 | Defensible            |
| Data collection         | 4. How well was the data collection carried out?                               | Appropriately         |
| Trustworthiness         | 5. Is the role of the researcher clearly described?                            | Clearly described     |
|                         | 6. Is the context clearly described?                                           | Clear                 |
|                         | 7. Were the methods reliable?                                                  | Reliable              |
| Analysis                | 8. Is the data analysis sufficiently rigorous?                                 | Rigorous              |
|                         | 9. Is the data 'rich'?                                                         | Rich                  |
|                         | 10. Is the analysis reliable?                                                  | Not sure/not reported |
|                         | 11. Are the findings convincing?                                               | Convincing            |
|                         | 12. Are the findings relevant to the aims of the study?                        | Relevant              |
|                         | 13. Conclusions                                                                | Adequate              |
| Ethics                  | 14. How clear and coherent is the reporting of ethics?                         | Appropriate           |
| Overall assessment      | As far as can be ascertained from the paper, how well was the study conducted? | ++                    |



| <b>Howe et al. [66]</b> |                                                                                |                   |
|-------------------------|--------------------------------------------------------------------------------|-------------------|
| Theoretical Approach    | 1. Is a qualitative approach appropriate?                                      | Appropriate       |
|                         | 2. Is the study clear in what it seeks to do?                                  | Clear             |
| Study design            | 3. How defensible/rigorous is the research design/methodology?                 | Defensible        |
| Data collection         | 4. How well was the data collection carried out?                               | Appropriately     |
| Trustworthiness         | 5. Is the role of the researcher clearly described?                            | Clearly described |
|                         | 6. Is the context clearly described?                                           | Clear             |
|                         | 7. Were the methods reliable?                                                  | Reliable          |
| Analysis                | 8. Is the data analysis sufficiently rigorous?                                 | Rigorous          |
|                         | 9. Is the data 'rich'?                                                         | Rich              |
|                         | 10. Is the analysis reliable?                                                  | Reliable          |
|                         | 11. Are the findings convincing?                                               | Convincing        |
|                         | 12. Are the findings relevant to the aims of the study?                        | Relevant          |
|                         | 13. Conclusions                                                                | Adequate          |
| Ethics                  | 14. How clear and coherent is the reporting of ethics?                         | Appropriate       |
| Overall assessment      | As far as can be ascertained from the paper, how well was the study conducted? | ++                |

| <b>Johannsson et al. [67]</b> |                                                                                |                       |
|-------------------------------|--------------------------------------------------------------------------------|-----------------------|
| Theoretical Approach          | 1. Is a qualitative approach appropriate?                                      | Appropriate           |
|                               | 2. Is the study clear in what it seeks to do?                                  | Clear                 |
| Study design                  | 3. How defensible/rigorous is the research design/methodology?                 | Defensible            |
| Data collection               | 4. How well was the data collection carried out?                               | Appropriately         |
| Trustworthiness               | 5. Is the role of the researcher clearly described?                            | Not described         |
|                               | 6. Is the context clearly described?                                           | Clear                 |
|                               | 7. Were the methods reliable?                                                  | Reliable              |
| Analysis                      | 8. Is the data analysis sufficiently rigorous?                                 | Rigorous              |
|                               | 9. Is the data 'rich'?                                                         | Rich                  |
|                               | 10. Is the analysis reliable?                                                  | Not sure/not reported |
|                               | 11. Are the findings convincing?                                               | Convincing            |
|                               | 12. Are the findings relevant to the aims of the study?                        | Relevant              |
|                               | 13. Conclusions                                                                | Adequate              |
| Ethics                        | 14. How clear and coherent is the reporting of ethics?                         | Appropriate           |
| Overall assessment            | As far as can be ascertained from the paper, how well was the study conducted? | ++                    |

| <b>LeDorze and Brassard [68]</b> |                                                                                |                       |
|----------------------------------|--------------------------------------------------------------------------------|-----------------------|
| Theoretical Approach             | 1. Is a qualitative approach appropriate?                                      | Appropriate           |
|                                  | 2. Is the study clear in what it seeks to do?                                  | Clear                 |
| Study design                     | 3. How defensible/rigorous is the research design/methodology?                 | Indefensible          |
| Data collection                  | 4. How well was the data collection carried out?                               | Appropriately         |
| Trustworthiness                  | 5. Is the role of the researcher clearly described?                            | Not described         |
|                                  | 6. Is the context clearly described?                                           | Clear                 |
|                                  | 7. Were the methods reliable?                                                  | Reliable              |
| Analysis                         | 8. Is the data analysis sufficiently rigorous?                                 | Rigorous              |
|                                  | 9. Is the data 'rich'?                                                         | Poor                  |
|                                  | 10. Is the analysis reliable?                                                  | Reliable              |
|                                  | 11. Are the findings convincing?                                               | Not convincing        |
|                                  | 12. Are the findings relevant to the aims of the study?                        | Relevant              |
|                                  | 13. Conclusions                                                                | Adequate              |
| Ethics                           | 14. How clear and coherent is the reporting of ethics?                         | Not sure/not reported |
| Overall assessment               | As far as can be ascertained from the paper, how well was the study conducted? | -                     |

| <b>LeDorze et al. [69]</b> |                                                                                |                       |
|----------------------------|--------------------------------------------------------------------------------|-----------------------|
| Theoretical Approach       | 1. Is a qualitative approach appropriate?                                      | Appropriate           |
|                            | 2. Is the study clear in what it seeks to do?                                  | Mixed                 |
| Study design               | 3. How defensible/rigorous is the research design/methodology?                 | Defensible            |
| Data collection            | 4. How well was the data collection carried out?                               | Appropriately         |
| Trustworthiness            | 5. Is the role of the researcher clearly described?                            | Not described         |
|                            | 6. Is the context clearly described?                                           | Clear                 |
|                            | 7. Were the methods reliable?                                                  | Reliable              |
| Analysis                   | 8. Is the data analysis sufficiently rigorous?                                 | Rigorous              |
|                            | 9. Is the data 'rich'?                                                         | Poor                  |
|                            | 10. Is the analysis reliable?                                                  | Reliable              |
|                            | 11. Are the findings convincing?                                               | Not convincing        |
|                            | 12. Are the findings relevant to the aims of the study?                        | Relevant              |
|                            | 13. Conclusions                                                                | Adequate              |
| Ethics                     | 14. How clear and coherent is the reporting of ethics?                         | Not sure/not reported |
| Overall assessment         | As far as can be ascertained from the paper, how well was the study conducted? | +                     |

| <b>LeDorze et al. [70]</b> |                                                                                |               |
|----------------------------|--------------------------------------------------------------------------------|---------------|
| Theoretical Approach       | 1. Is a qualitative approach appropriate?                                      | Appropriate   |
|                            | 2. Is the study clear in what it seeks to do?                                  | Clear         |
| Study design               | 3. How defensible/rigorous is the research design/methodology?                 | Not Sure      |
| Data collection            | 4. How well was the data collection carried out?                               | Appropriately |
| Trustworthiness            | 5. Is the role of the researcher clearly described?                            | Not described |
|                            | 6. Is the context clearly described?                                           | Clear         |
|                            | 7. Were the methods reliable?                                                  | Not sure      |
| Analysis                   | 8. Is the data analysis sufficiently rigorous?                                 | Rigorous      |
|                            | 9. Is the data 'rich'?                                                         | Rich          |
|                            | 10. Is the analysis reliable?                                                  | Reliable      |
|                            | 11. Are the findings convincing?                                               | Convincing    |
|                            | 12. Are the findings relevant to the aims of the study?                        | Relevant      |
|                            | 13. Conclusions                                                                | Adequate      |
| Ethics                     | 14. How clear and coherent is the reporting of ethics?                         | Appropriate   |
| Overall assessment         | As far as can be ascertained from the paper, how well was the study conducted? | 2. +          |

| <b>Matos et al. [71]</b> |                                                                                |                    |
|--------------------------|--------------------------------------------------------------------------------|--------------------|
| Theoretical Approach     | 1. Is a qualitative approach appropriate?                                      | Appropriate        |
|                          | 2. Is the study clear in what it seeks to do?                                  | Clear              |
| Study design             | 3. How defensible/rigorous is the research design/methodology?                 | Not Sure           |
| Data collection          | 4. How well was the data collection carried out?                               | Appropriately      |
| Trustworthiness          | 5. Is the role of the researcher clearly described?                            | Not described      |
|                          | 6. Is the context clearly described?                                           | Clear              |
|                          | 7. Were the methods reliable?                                                  | Reliable           |
| Analysis                 | 8. Is the data analysis sufficiently rigorous?                                 | Rigorous           |
|                          | 9. Is the data 'rich'?                                                         | Poor               |
|                          | 10. Is the analysis reliable?                                                  | Reliable           |
|                          | 11. Are the findings convincing?                                               | Not sure           |
|                          | 12. Are the findings relevant to the aims of the study?                        | Partially Relevant |
|                          | 13. Conclusions                                                                | Adequate           |
| Ethics                   | 14. How clear and coherent is the reporting of ethics?                         | Appropriate        |
| Overall assessment       | As far as can be ascertained from the paper, how well was the study conducted? | +                  |

| <b>Natterlund. [72]</b> |                                                                                |                       |
|-------------------------|--------------------------------------------------------------------------------|-----------------------|
| Theoretical Approach    | 1. Is a qualitative approach appropriate?                                      | Appropriate           |
|                         | 2. Is the study clear in what it seeks to do?                                  | Clear                 |
| Study design            | 3. How defensible/rigorous is the research design/methodology?                 | Not Sure              |
| Data collection         | 4. How well was the data collection carried out?                               | Appropriately         |
| Trustworthiness         | 5. Is the role of the researcher clearly described?                            | Not described         |
|                         | 6. Is the context clearly described?                                           | Clear                 |
|                         | 7. Were the methods reliable?                                                  | Reliable              |
| Analysis                | 8. Is the data analysis sufficiently rigorous?                                 | Rigorous              |
|                         | 9. Is the data 'rich'?                                                         | Rich                  |
|                         | 10. Is the analysis reliable?                                                  | Not sure/not reported |
|                         | 11. Are the findings convincing?                                               | Convincing            |
|                         | 12. Are the findings relevant to the aims of the study?                        | Relevant              |
|                         | 13. Conclusions                                                                | Adequate              |
| Ethics                  | 14. How clear and coherent is the reporting of ethics?                         | Appropriate           |
| Overall assessment      | As far as can be ascertained from the paper, how well was the study conducted? | ++                    |

| <b>Niemi and Johansson.[73]</b> |                                                                                |                       |
|---------------------------------|--------------------------------------------------------------------------------|-----------------------|
| Theoretical Approach            | 1. Is a qualitative approach appropriate?                                      | Appropriate           |
|                                 | 2. Is the study clear in what it seeks to do?                                  | Clear                 |
| Study design                    | 3. How defensible/rigorous is the research design/methodology?                 | Defensible            |
| Data collection                 | 4. How well was the data collection carried out?                               | Appropriately         |
| Trustworthiness                 | 5. Is the role of the researcher clearly described?                            | Clearly described     |
|                                 | 6. Is the context clearly described?                                           | Clear                 |
|                                 | 7. Were the methods reliable?                                                  | Reliable              |
| Analysis                        | 8. Is the data analysis sufficiently rigorous?                                 | Rigorous              |
|                                 | 9. Is the data 'rich'?                                                         | Rich                  |
|                                 | 10. Is the analysis reliable?                                                  | Not sure/not reported |
|                                 | 11. Are the findings convincing?                                               | Not sure              |
|                                 | 12. Are the findings relevant to the aims of the study?                        | Relevant              |
|                                 | 13. Conclusions                                                                | Adequate              |
| Ethics                          | 14. How clear and coherent is the reporting of ethics?                         | Appropriate           |
| Overall assessment              | As far as can be ascertained from the paper, how well was the study conducted? | +                     |

| <b>Parr. [74]</b>    |                                                                                |                       |
|----------------------|--------------------------------------------------------------------------------|-----------------------|
| Theoretical Approach | 1. Is a qualitative approach appropriate?                                      | Appropriate           |
|                      | 2. Is the study clear in what it seeks to do?                                  | Clear                 |
| Study design         | 3. How defensible/rigorous is the research design/methodology?                 | Defensible            |
| Data collection      | 4. How well was the data collection carried out?                               | Appropriately         |
| Trustworthiness      | 5. Is the role of the researcher clearly described?                            | Not described         |
|                      | 6. Is the context clearly described?                                           | Clear                 |
|                      | 7. Were the methods reliable?                                                  | Reliable              |
| Analysis             | 8. Is the data analysis sufficiently rigorous?                                 | Not sure/not reported |
|                      | 9. Is the data 'rich'?                                                         | Rich                  |
|                      | 10. Is the analysis reliable?                                                  | Not sure/not reported |
|                      | 11. Are the findings convincing?                                               | Not sure              |
|                      | 12. Are the findings relevant to the aims of the study?                        | Relevant              |
|                      | 13. Conclusions                                                                | Adequate              |
| Ethics               | 14. How clear and coherent is the reporting of ethics?                         | Not sure/not reported |
| Overall assessment   | As far as can be ascertained from the paper, how well was the study conducted? | +                     |

| <b>Parr. [75]</b>    |                                                                                |                       |
|----------------------|--------------------------------------------------------------------------------|-----------------------|
| Theoretical Approach | 1. Is a qualitative approach appropriate?                                      | Appropriate           |
|                      | 2. Is the study clear in what it seeks to do?                                  | Clear                 |
| Study design         | 3. How defensible/rigorous is the research design/methodology?                 | Defensible            |
| Data collection      | 4. How well was the data collection carried out?                               | Appropriately         |
| Trustworthiness      | 5. Is the role of the researcher clearly described?                            | Unclear               |
|                      | 6. Is the context clearly described?                                           | Clear                 |
|                      | 7. Were the methods reliable?                                                  | Reliable              |
| Analysis             | 8. Is the data analysis sufficiently rigorous?                                 | Not sure/not reported |
|                      | 9. Is the data 'rich'?                                                         | Not sure/not reported |
|                      | 10. Is the analysis reliable?                                                  | Not sure/not reported |
|                      | 11. Are the findings convincing?                                               | Not sure              |
|                      | 12. Are the findings relevant to the aims of the study?                        | Relevant              |
|                      | 13. Conclusions                                                                | Inadequate            |
| Ethics               | 14. How clear and coherent is the reporting of ethics?                         | Inappropriate         |
| Overall assessment   | As far as can be ascertained from the paper, how well was the study conducted? | -                     |

| <b>Pound. [76]</b>   |                                                                                |               |
|----------------------|--------------------------------------------------------------------------------|---------------|
| Theoretical Approach | 1. Is a qualitative approach appropriate?                                      | Appropriate   |
|                      | 2. Is the study clear in what it seeks to do?                                  | Clear         |
| Study design         | 3. How defensible/rigorous is the research design/methodology?                 | Defensible    |
| Data collection      | 4. How well was the data collection carried out?                               | Appropriately |
| Trustworthiness      | 5. Is the role of the researcher clearly described?                            | Unclear       |
|                      | 6. Is the context clearly described?                                           | Clear         |
|                      | 7. Were the methods reliable?                                                  | Reliable      |
| Analysis             | 8. Is the data analysis sufficiently rigorous?                                 | Rigorous      |
|                      | 9. Is the data 'rich'?                                                         | Rich          |
|                      | 10. Is the analysis reliable?                                                  | Reliable      |
|                      | 11. Are the findings convincing?                                               | Convincing    |
|                      | 12. Are the findings relevant to the aims of the study?                        | Relevant      |
|                      | 13. Conclusions                                                                | Adequate      |
| Ethics               | 14. How clear and coherent is the reporting of ethics?                         | Appropriate   |
| Overall assessment   | As far as can be ascertained from the paper, how well was the study conducted? | ++            |

| <b>Pringle et al. [77]</b> |                                                                                |                       |
|----------------------------|--------------------------------------------------------------------------------|-----------------------|
| Theoretical Approach       | 1. Is a qualitative approach appropriate?                                      | Appropriate           |
|                            | 2. Is the study clear in what it seeks to do?                                  | Unclear               |
| Study design               | 3. How defensible/rigorous is the research design/methodology?                 | Indefensible          |
| Data collection            | 4. How well was the data collection carried out?                               | Appropriately         |
| Trustworthiness            | 5. Is the role of the researcher clearly described?                            | Not described         |
|                            | 6. Is the context clearly described?                                           | Unclear               |
|                            | 7. Were the methods reliable?                                                  | Reliable              |
| Analysis                   | 8. Is the data analysis sufficiently rigorous?                                 | Not sure/not reported |
|                            | 9. Is the data 'rich'?                                                         | Poor                  |
|                            | 10. Is the analysis reliable?                                                  | Not sure/not reported |
|                            | 11. Are the findings convincing?                                               | Not convincing        |
|                            | 12. Are the findings relevant to the aims of the study?                        | Partially Relevant    |
|                            | 13. Conclusions                                                                | Inadequate            |
| Ethics                     | 14. How clear and coherent is the reporting of ethics?                         | Appropriate           |
| Overall assessment         | As far as can be ascertained from the paper, how well was the study conducted? | -                     |

| <b>Runne. [78]</b>   |                                                                                |                       |
|----------------------|--------------------------------------------------------------------------------|-----------------------|
| Theoretical Approach | 1. Is a qualitative approach appropriate?                                      | Appropriate           |
|                      | 2. Is the study clear in what it seeks to do?                                  | Mixed                 |
| Study design         | 3. How defensible/rigorous is the research design/methodology?                 | Defensible            |
| Data collection      | 4. How well was the data collection carried out?                               | Appropriately         |
| Trustworthiness      | 5. Is the role of the researcher clearly described?                            | Not described         |
|                      | 6. Is the context clearly described?                                           | Clear                 |
|                      | 7. Were the methods reliable?                                                  | Reliable              |
| Analysis             | 8. Is the data analysis sufficiently rigorous?                                 | Not sure/not reported |
|                      | 9. Is the data 'rich'?                                                         | Rich                  |
|                      | 10. Is the analysis reliable?                                                  | Reliable              |
|                      | 11. Are the findings convincing?                                               | Not convincing        |
|                      | 12. Are the findings relevant to the aims of the study?                        | Partially Relevant    |
|                      | 13. Conclusions                                                                | Not sure              |
| Ethics               | 14. How clear and coherent is the reporting of ethics?                         | Not sure/not reported |
| Overall assessment   | As far as can be ascertained from the paper, how well was the study conducted? | -                     |

| <b>Worrall et al. [79]</b> |                                                                                |                       |
|----------------------------|--------------------------------------------------------------------------------|-----------------------|
| Theoretical Approach       | 1. Is a qualitative approach appropriate?                                      | Appropriate           |
|                            | 2. Is the study clear in what it seeks to do?                                  | Clear                 |
| Study design               | 3. How defensible/rigorous is the research design/methodology?                 | Defensible            |
| Data collection            | 4. How well was the data collection carried out?                               | Appropriately         |
| Trustworthiness            | 5. Is the role of the researcher clearly described?                            | Not described         |
|                            | 6. Is the context clearly described?                                           | Unclear               |
|                            | 7. Were the methods reliable?                                                  | Reliable              |
| Analysis                   | 8. Is the data analysis sufficiently rigorous?                                 | Not sure/not reported |
|                            | 9. Is the data 'rich'?                                                         | Poor                  |
|                            | 10. Is the analysis reliable?                                                  | Not sure/not reported |
|                            | 11. Are the findings convincing?                                               | Convincing            |
|                            | 12. Are the findings relevant to the aims of the study?                        | Relevant              |
|                            | 13. Conclusions                                                                | Adequate              |
| Ethics                     | 14. How clear and coherent is the reporting of ethics?                         | Not sure/not reported |
| Overall assessment         | As far as can be ascertained from the paper, how well was the study conducted? | +                     |
